1  
2  
3  
4  
5  
6  
7  
8  
9  
10  
11  
12  
13  
14  
15  
16  
17  
18  
19  
20  
21  
22

## **A novel RAB11-containing adaptor complex anchoring myosin-5 to secretory vesicles**

Mario Pinar<sup>1</sup>, Ana Alonso<sup>1</sup>, Vivian de los Ríos<sup>2</sup>, Ignacio Bravo-Plaza<sup>1</sup>, Álvaro Gandara<sup>3</sup>, Ernesto Arias-Palomo<sup>3</sup> and Miguel Á. Peñalva<sup>1,\*</sup>

1. Department of Cellular and Molecular Biology

2. Proteomics Facility

3. Department of Chemical and Structural Biology

Centro de Investigaciones Biológicas CSIC, Ramiro de Maeztu 9, 28040 Madrid, Spain

(\*) Corresponding author at the above address, Miguel A. Peñalva

([penalva@cib.csic.es](mailto:penalva@cib.csic.es); direct phone: +34911097358

<https://orcid.org/0000-0002-3102-2806>

**Short title:** On how myosin-5 engages fungal secretory vesicles

23

24 **Abstract**

25 Hyphal fungi grow rapidly by apical extension, providing a notorious example of polarized  
26 growth. The continuous supply of secretory vesicles necessary to meet the demands of  
27 the extending tip and the long intracellular distances existing between the tip and the  
28 basal septum, often localized > 100  $\mu\text{m}$  away from the former, impose the need of  
29 efficient networks of intracellular traffic involving exquisite cooperation between  
30 microtubule- and actin-mediated transport. In *Aspergillus nidulans* kinesin-1 conveys  
31 secretory vesicles to the hyphal tip, where they are transferred to myosin-5, which  
32 focuses them at the growing apex, thereby determining cell shape. This relay mechanism  
33 and the central role played by myosin-5 in hyphal morphogenesis suggested that the  
34 mechanisms anchoring secretory vesicles to this motor should involve specific  
35 adaptor(s) ensuring the robustness of actomyosin-dependent transport.

36 Secretory vesicles are charged with RAB11, a regulatory GTPase that determines  
37 the Golgi to post-Golgi identity transition. By using a combination of shotgun proteomics,  
38 GST-RAB pull-down assays, *in vitro* reconstitution experiments, targeted reverse  
39 genetics and multidimensional fluorescence microscopy with endogenously tagged  
40 proteins we show that RAB11, the master regulator of fungal exocytosis, mediates  
41 myosin-5 engagement both by contacting the motor and by recruiting UDS1, a  
42 homologue of an as yet uncharacterized *Schizosaccharomyces* protein ‘upregulated  
43 during mitosis’, which we demonstrate to be a novel RAB11 effector. Analytical  
44 ultracentrifugation determined that UDS1 is an elongated dimer and negative-stain  
45 electron microscopy showed that, in agreement, UDS1 is rod-shaped. UDS1 does not  
46 contact myosin-5 directly, but rather recruits the coiled-coil HMSV, which bridges  
47 RAB11/UDS1 to myosin-5. An HMSV-scaffolded complex containing UDS1 and myosin-  
48 5 is present in cells, and a RAB11-UDS1-HMSV complex can be reconstituted *in vitro* in  
49 a RAB nucleotide state-dependent manner. In the absence of UDS1/HMSV the steady  
50 state levels of myosin-5 at the apical vesicle supply center diminish markedly, such that  
51 microtubule-dependent transport spreading vesicles across the apical dome  
52 predominates over apex-focused actin-mediated transport. As a consequence, RAB11  
53 and chitin-synthase B (a cargo of the RAB11 pathway) are not focused at the apex, being  
54 distributed instead across the apical dome. Therefore, the RAB11 effector UDS1/HMSV  
55 cooperates with the GTPase to adapt secretory vesicles to myosin-5, which is required  
56 for the apical targeting of RAB11 cargoes and thus for the normal morphology of the  
57 hyphae.

58

59

60

## 61 **Introduction**

62

63 How the multiplicity of membranous cargoes of eukaryotic cells are specifically adapted  
64 to molecular motors constitutes a fundamental question of cell biology. Across the  
65 eukaryotic realm, type V myosins play a key role in the transport of these cargoes, often  
66 acting in concert with microtubule-dependent motors (Hammer & Sellers, 2012). For  
67 example, in the filamentous fungus *Aspergillus nidulans*, a single myosin-5 (denoted  
68 MyoE) and a kinesin-1 (KinA) cooperate to transport RAB11 secretory vesicles (SVs)  
69 originating at the Golgi to the hyphal apices (Pantazopoulou et al., 2014, Peñalva et al.,  
70 2017).

71

72 In *A. nidulans* and other hyphal fungi these SVs concentrate at an apical structure  
73 denoted Spitzenkörper (SPK), which acts as a vesicle supply center from which SVs are  
74 delivered to the growing tip's plasma membrane. The SPK contains a F-actin organizing  
75 center (Sharpless & Harris, 2002), such that actin cables span the region of the tip  
76 spreading out from the apex like the ribs of an umbrella. In contrast, microtubules (MTs)  
77 make apical contacts with their plus-ends at a broader, crescent-shaped region of the tip  
78 denoted 'the apical dome'.

79

80 A division of roles underlies cooperation between actomyosin and microtubule (MT)  
81 transport in *A. nidulans* (Pantazopoulou et al., 2014, Peñalva et al., 2017, Pinar et al.,  
82 2015, Pinar & Peñalva, 2020, Schuchardt et al., 2005, Zhang et al., 2011): kinesin-1  
83 conveys RAB11 SVs to the hyphal tips whereas myosin-5 concentrates them at the SPK  
84 (Figure 1A). The partially redundant role played by kinesin-1 makes myosin-5 non-  
85 essential, although its absence slows down growth markedly and causes morphological  
86 abnormalities resulting from inability to focus exocytosis at the apex. Cooperation  
87 between the microtubule and the actin cytoskeletons is not uncommon in tip-growing  
88 cells of organisms that are evolutionary distant from fungi. Another notable example of  
89 this cooperation occurs in the protonema of the moss *Physcomitrella patens*, which  
90 contains a cluster of F-actin at the apex that governs the directionality of growth, and that  
91 strikingly resembles the fungal SPK/vesicle supply center (Wu & Bezanilla, 2018)

92

93 Membranous cargoes attach to the globular C-terminal domain (GTD) of myosin-5 via  
94 'receptors' that are cargo-specific adaptors (Hammer & Sellers, 2012, Pashkova et al.,  
95 2006, Wu et al., 2002). In the case of SVs these adaptors contain a RAB GTPase, be it

96 RAB11, Sec4/RAB8 or both (Wong & Weisman, 2021). In *S. cerevisiae*, Ypt31/32 (yeast  
97 RAB11s) and Sec4 (yeast Rab8) bind directly and without involvement of any other  
98 proteinaceous co-adaptor to the GTD of the myosin-5 Myo2p (Jin et al., 2011, Lipatova  
99 et al., 2008, Santiago-Tirado et al., 2011), although the levels of PtdIns4P on SVs are  
100 also important for the Myo2p-SV association (Santiago-Tirado et al., 2011). However,  
101 this model of the RAB as the only component of the myosin-5 adaptor to RAB11 vesicles  
102 is far from being universal. For example, in mammalian cells the RAB11a effector  
103 RAB11-FIP2 (RAB11 family interacting protein 2) acts as co-adaptor cooperating with  
104 the GTPase to recruit myosin-Vb to recycling endosome vesicles (Hales et al., 2002,  
105 Schafer et al., 2014, Wang et al., 2008), and in flies a protein trio consisting of myosin  
106 V, RAB11 and dRip11 deliver exocytic vesicles to the rhabdomere base (Li et al., 2007).

107

108 Intracellular distances in hyphal tip cells are remarkably large (up to 125  $\mu\text{m}$  from tip to  
109 septum). Thus, it is unsurprising that *A. nidulans* uses MTs for the long-distance shuttling  
110 of membranous organelles. This feature has been experimentally advantageous to study  
111 adaptors by which organelles engage motors. For example, studies on the MT-  
112 dependent movement of early endosomes in *A. nidulans* led to the discovery of the  
113 FTS/Hook/FHIP (FHF) complex serving as adaptor between dynein and endosome  
114 cargo (Bielska et al., 2014, Qiu et al., 2019, Yao et al., 2014, Zhang et al., 2014)

115

116 Hyphae of *A. nidulans* grow by apical extension at  $\sim 1 \mu\text{m}/\text{min}$  at  $28^\circ\text{C}$ , implying that  
117 transport of SVs to the extending tip is optimized to meet the high demand of lipids that  
118 fuel the expansion in membrane surface, as well as to deliver enzymes that modify the  
119 cell wall to facilitate growth. SVs are loaded with three motors: myosin-5, kinesin-1 and  
120 dynein (Peñalva et al., 2017). It has been suggested that SVs are handed over from by  
121 kinesin-1 to myosin-5 in the region of the tip, hypothetically by switching from MT to actin  
122 cables, yet the mechanism by which myosin-5 prevails over kinesin-1 in the tip region is  
123 not understood. In view of the crucial role that myosin-5 plays in their lifestyle, we  
124 hypothesized that hyphal fungi have an adaptor by which SVs engage this motor very  
125 robustly, to ensure the efficiency of the latest step in their transport. Here we report the  
126 molecular composition of a novel adaptor that engages SVs with myosin-5. We show  
127 that myosin-5 is recruited to SVs via a RAB11 protein complex also containing UDS1  
128 and HMSV, two proteins whose homologues in *Neurospora crassa* have been recently  
129 identified as components of the SPK (Zheng et al., 2020). Trafficking of RAB11 SVs to  
130 the SPK/vesicle supply center is impaired if this complex is disrupted, as expected for a  
131 bona fide co-adaptor of myosin-5.

132

## 133 **Results**

### 134 **Myosin-5 is key for delivering RAB11 secretory vesicles to the hyphal tips**

135 The efficiency of myosin-5 transport is reflected in the distribution of RAB11 SVs  
136 accumulating in the tips before fusing with the PM. In the wild-type, these SVs gather at  
137 the SPK/vesicle supply center. In *myoE* $\Delta$  cells completely lacking myosin-5 transport  
138 SVs cannot be focused at the SPK, yet they still arrive at the tip by kinesin-1/microtubule-  
139 mediated transport (Pantazopoulou et al., 2014, Peñalva et al., 2017) (Figure 1B).  
140 Consequently, RAB11 is delocalized from the SPK to a tip crescent that reflects the  
141 steady-state distribution of the microtubules' plus-ends at the apical dome cortex (Figure  
142 1A). This delocalization is paralleled by a conspicuous reduction of RAB11 in the tip  
143 (Figure 1B), strongly suggesting that myosin-5 is a major contributor to the transport of  
144 RAB11. Consistent with a secretory defect, loss of myosin-5 results in abnormal hyphal  
145 morphogenesis [Figure 1B, note that exocytosis determines the shape of the cell wall  
146 and markedly reduces growth (Figure 1F)(Peñalva et al., 2017, Taheri-Talesh et al.,  
147 2012)].

148  
149 A candidate to adapt myosin-5 to RAB11 SVs is the RAB GTPase Sec4 acting  
150 downstream of RAB11 during transport between the TGN and the PM (Jin et al., 2011).  
151 This could be tested directly because Sec4 is not essential in *A. nidulans*, despite of its  
152 absence being nearly as debilitating as that of MyoE/myosin-5 (Figure 1F). Indeed, the  
153 amounts of RAB11 SVs accumulating in the tip were noticeably decreased in *sec4* $\Delta$   
154 hyphae (Figure 1C). However, contrasting with *myoE* $\Delta$  mutants, *sec4* $\Delta$  mutants were still  
155 able to gather RAB11 SVs at the SPK. In agreement, myosin-5/MyoE still concentrated  
156 in the SPK in the absence of Sec4, albeit less efficiently as well (Figure 1D and Movie  
157 1). Therefore, these data establish that there must be another adaptor sharing with Sec4  
158 the ability to engage SVs to myosin-5. Previous studies with fungal and metazoan cells  
159 pointed to RAB11 as the most likely candidate (Goldenring, 2015, Hales et al., 2002,  
160 Lipatova et al., 2008, Roland et al., 2011).

### 161 **Both RAB11 and Sec4 interact directly with myosin-5.**

162 In the intensively studied transport of SVs to the growing bud of *S. cerevisiae*, the RAB11  
163 homologues Ypt31/32 and Sec4 recruit Myo2 through direct binding to an amino acid  
164 patch located in the highly conserved globular tail domain (GTD) of this myosin-5 (Jin et  
165 al., 2011, Lipatova et al., 2008). If this mechanism were conserved in *Aspergillus*, the  
166 MyoE GTD domain, isolated from the rest of the protein, should bind the RABs present  
167 on the SVs, being transported with them to the tips. To test this prediction, we expressed

168 a construct consisting of the GFP-tagged MyoE GTD domain in *Aspergillus* wild-type,  
169 *myoE* $\Delta$  and *sec4* $\Delta$  hyphae (Figure 1E). In the wt, GFP-GTD, although partly cytosolic,  
170 was present in SVs accumulating at the tip, indicating that the GTD is indeed sufficient  
171 to localize to SVs *in vivo*. This recruitment of the GTD to SVs did not depend on  
172 interaction with resident myosin-5 because in *myoE* $\Delta$  cells GFP-GTD localized to the  
173 apical dome (Figure 1C), recapitulating the distribution of RAB11 SVs (Figure  
174 1B,C)(Movie 2). We concluded that the MyoE GTD is sufficient to bind to SVs.  
175 Remarkably, the MyoE GTD also concentrated at the apex of *sec4* $\Delta$  cells (Figure 1C),  
176 further confirming that myosin-5 transport of SVs is still operative without Sec4.

177

178 In the budding yeast, critical residue Tyr1415 is at the center of a Myo2 GTD patch that  
179 binds the RABs linking the motor to SVs (Figure 1F, schematics). Because the budding  
180 yeast does not use microtubules to transport SVs, Y1415R substitution affecting a  
181 residue crucial for the interaction between the RABs and the myosin-5 is lethal (Lipatova  
182 et al., 2008). K1473 located on the opposite GTD surface to Y1415 (Figure 1F) belongs  
183 to a patch of residues that has been reported to bind the Sec15 subunit of the exocyst  
184 (Jin et al., 2011) and to participate in GTD-motor domain interactions maintaining Myo2p  
185 in a closed conformation (Donovan & Bretscher, 2015). To investigate RAB/MyoE  
186 interactions we introduced substitutions Y1414R and K1472E (equivalent to *S.*  
187 *cerevisiae* Y1415 and K1473) into MyoE by replacing the wt *myoE* locus with the  
188 corresponding mutant alleles. Y1414R resulted in a conspicuous growth defect,  
189 confirming that MyoE Y1414 plays an important physiological role. In contrast K1472E  
190 caused a minor colony growth defect by itself. In double mutants *myoE* (K1472E) did not  
191 weaken *sec4* $\Delta$  strains any further. In sharp contrast, the double *sec4* $\Delta$  *myoE* (Y1414R)  
192 mutant combination was nearly lethal (Figure 1F). As Y1414 is crucial for RAB binding,  
193 these data provide strong genetic evidence that an exocytic RAB other than Sec4 is  
194 capable of binding directly to the myosin-5 GTD.

195

196 Therefore, we investigated the possibility that MyoE is a direct effector of both Sec4 and  
197 RAB11. As MyoE is insoluble when expressed in bacteria, we synthesized MyoE in a  
198 coupled transcription/translation system and used this protein as prey in GST-RAB pull-  
199 down assays in which MyoE was detected with a rabbit polyclonal antiserum raised  
200 against its GTD. In these assays Sec4-GST and RAB11-GST, but not RAB5b-GST  
201 [RAB5b is the main EE RAB (Abenza et al., 2010)] pulled-down MyoE, showing discreet  
202 yet reproducible nucleotide specificity (Figure 1G). Nucleotide specificity was  
203 nevertheless established by experiments showing that myosin-5 was specifically

204 retained by GST-RAB11 GTP $\gamma$ S-affinity beads ([Figure 2A](#), see below). Thus, Sec4 and  
205 RAB11 bind MyoE directly, focusing SVs at the SPK.

206

### 207 **The actomyosin pathway protein UDS1 is a prototypic RAB11 effector**

208 We hypothesized that other RAB11 effectors might reinforce the binding of MyoE to GTP-  
209 RAB11, similar to the situation with mammalian RAB11 and myosin-Vb (Hales et al.,  
210 2002, Schafer et al., 2014). To search for these effectors, we identified by liquid  
211 chromatography and tandem mass spectrometry (LC-MS/MS) the proteins retained by  
212 glutathione Sepharose beads containing RAB11-GST baits loaded with GDP or GTP $\gamma$ -  
213 S. The resulting hits were ordered by abundance of peptide spectra matches (PSMs) in  
214 the GTP $\gamma$ S sample relative to the GDP one, which helped to identify potential  
215 physiological hits. The highly abundant GDP-dissociation inhibitor GdiA (Pinar et al.,  
216 2015) served as specific GDP-RAB binder control, the previously characterized and  
217 abundant RAB11-GTP effector BapH (Pinar & Peñalva, 2017) served as positive control,  
218 and the unrelated AP-2 alpha-adaptin as negative one ([Figure 2A](#)). This analysis  
219 highlighted two potential actin-related hits. One was MyoE itself, which was exclusively  
220 retained by GST-RAB11 (GTP) beads, reinforcing the conclusion that this myosin-5 is a  
221 RAB11 effector. The second was the relatively abundant and highly specific RAB11-GTP  
222 effector AN5595 ([Figure 2A](#)). The 941 residue AN5595 product is predicted to have a  
223 strong tendency to form coiled-coils ([Figure 2B](#)). A *N. crassa* homologue of AN5595  
224 denoted JANUS-1 interacts with the polarisome component Spa2 and has been  
225 suggested to serve as an SPK scaffold (Zheng et al., 2020). However, AN5595 showed  
226 features of an actomyosin regulator ([Figure 2B](#)), as it contains a SCOP Superfamily  
227 tropomyosin domain (SSF57997) suggestive of a parallel coiled-coil quaternary  
228 structure, and a UDS1 domain (PF15456) named after its as yet uncharacterized  
229 *Schizosaccharomyces pombe* homologue, whose name stands for ‘upregulated during  
230 septation’, and which localizes to the contractile actin ring in the mitotic septum (Ikebe  
231 et al., 2011). Therefore, we denoted AN5595 as UDS1.

232

233 To confirm that UDS1 is a *bona fide* RAB11 effector we HA3-tagged the protein  
234 endogenously and used USD1-HA3 cell extracts in pull-down assays with purified GST-  
235 RAB baits, loaded with GTP $\gamma$ S or GDP, and with GST-GFP as negative control. UDS1-  
236 HA3 was pulled-down solely by GTP $\gamma$ S-RAB11 but not by GFP, GDP-RAB11, GTP $\gamma$ S-  
237 RAB5b or GDP-RAB5b baits ([Figure 2C](#)), confirming that UDS1 is subordinated to  
238 RAB11.

239

240 Next, we purified UDS1-His6 from bacteria. By gel filtration chromatography UDS1  
241 eluted at a position corresponding to > 600 kDa (Figure S1), suggesting homo-  
242 oligomerization and/or a 3D structure substantially deviating from the globular shape.  
243 Sedimentation equilibrium ultracentrifugation of purified UDS1 (Mr 106,857 Da) revealed  
244 a buoyant mass of  $57002 \pm 403$  Da corresponding to a molar mass of  $209,073 \text{ Da} \pm 1612$   
245 Da, matching the molecular weight of a dimer (Figure 2D). Moreover, although the  
246 flexibility observed at the level of individual particles precluded us from obtaining 2D  
247 averages, individual EM images revealed a rod-shaped structure highly suggestive of a  
248 highly elongated coiled-coiled dimer. Therefore, UDS1 is an elongated dimer, with an  
249 approximate length of  $\sim 500 \text{ \AA}$  (Figure 2E).

250

251 As the above RAB pull-down experiments using cell extracts do not rule out the  
252 possibility that RAB11 and UDS1 interact by way of bridging protein(s), we used the His-  
253 tagged protein to repeat the GST-RAB pull-down assays. Figure 2F shows that purified  
254 UDS1 behaves as the protein present in *Aspergillus* extracts, being pulled-down by  
255  $\text{GTP}\gamma\text{S-RAB11}$  but not by  $\text{GDP-RAB11}$ , nor by the inactive or active forms of RAB5b and  
256 Sec4. In summary, UDS1 is a coiled-coil dimer that binds directly to the (GTP) active  
257 form of RAB11.

### 258 ***Aspergillus* UDS1 colocalizes with both myosin-5 and RAB11 SVs**

259 In current models (Figure 1A), RAB11 SVs arrive at the tip using kinesin-1 and are further  
260 concentrated at the SPK by myosin-5. Figure 3A shows that in agreement with these  
261 models RAB11 SVs fill a region at the apex that extends slightly beyond the SPK, as  
262 defined by the strictly apical MyoE-GFP signal. In colocalization experiments with  
263 RAB11, UDS1 behaves like MyoE, being restricted to the SPK, whereas RAB11 shows  
264 a slightly broader distribution (Figure 3B)(Movie 3). This distribution of RAB11 SVs  
265 extending beyond the SPK resembles the distribution of vesicles with a diameter of 70-  
266 90 nm observed by EM at the tip region (Hohmann-Marriott et al., 2006), which suggests  
267 that these vesicles correspond to RAB11 SVs. The behavior of UDS1, akin to that of  
268 MyoE, is consistent with UDS1 being a MyoE associate. Indeed, as predicted, UDS1  
269 strictly colocalizes with myosin-5 in still images (Figure 3C) and across time, as seen in  
270 Figure 3C kymograph derived from a movie covering > 15 min (Movie 4). Moreover, in  
271 the absence of myosin-5 resulting in redistribution of RAB11 vesicles from the SPK to  
272 the apical dome (Figure 1A) UDS1 strictly colocalizes with RAB11 SVs arriving at the  
273 apical dome by way of MTs (Figure 3D), agreeing with UDS1 being a RAB11 effector  
274 that is present in SVs, rather than a structural component of the SPK. Movie 5 shows



275 how UDS1-GFP recurs in the apical dome of a *myoE* $\Delta$  tip, as would be expected if UDS1  
276 SVs arrive through MT transport to the PM.

277

## 278 **Myosin-5 associates directly with HMSV, a fourth component of the** 279 **RAB11/actomyosin pathway**

280 To investigate the possibility that MyoE and UDS1 associate, we analyzed, by LC-  
281 MS/MS, GFP-Trap immunoprecipitates of MyoE-GFP and UDS1-GFP cells, using  
282 immunoprecipitates of a strain expressing the unrelated bait Uso1-GFP as a negative  
283 control (Uso1 acts in the ER/Golgi interface). UDS1 indeed pulled down MyoE, although  
284 MyoE pulled down UDS1 inefficiently, suggestive of weak or indirect interaction ([Figure](#)  
285 [4A](#)). Remarkably, an as yet uncharacterized protein, the product of AN1213,  
286 coprecipitated with MyoE-GFP quite efficiently. Conversely, MyoE coprecipitated  
287 efficiently with GFP-tagged AN1213. A homologue of AN1213, denoted SPZ-1, has been  
288 investigated in *N. crassa* and proposed to serve as scaffold at the SPK (Zheng et al.,  
289 2020). However, for reasons that become clear below we denoted AN1213 as HMSV  
290 (*hooking myosin to SVs*). HMSV coprecipitated with UDS1-GFP as well, indicating that  
291 these proteins also interact ([Figure 4A](#)). In short, MyoE, UDS1 and HMSV appear to be  
292 associates, and components of the RAB11 pathway

293

294 HMSV is a 994 residue-long protein whose 300 N-terminal residues are predicted to be  
295 disordered, while the remaining ~700 residues have strong propensity to form coiled-  
296 coils ([Figure 4B](#)). Like UDS1, HMSV localizes to the SPK, strictly colocalizing with MyoE  
297 ([Figure 4C](#))([Movie 6](#)). To determine the phenotypic consequences of removing UDS1  
298 and HMSV we constructed null *uds1* $\Delta$  and *hmsV* $\Delta$  alleles. They are phenotypically  
299 indistinguishable, resulting in a radial colony growth defect ([Figure 4D](#)) and, at the  
300 cellular level, in abnormally wide hyphae ([Figure 4E](#)), both phenotypic features indicative  
301 of defective exocytosis. Notably, the colony growth defect resulting from *uds1* $\Delta$  and  
302 *hmsV* $\Delta$  was markedly weaker than that caused by *myoE* $\Delta$  ([Figure 4D](#)). Double *uds1* $\Delta$   
303 *hmsV* $\Delta$  mutants behaved like the parental single mutants, consistent with the  
304 corresponding products being components of a functional unit ([Figure S2](#)). The fact that  
305 both *uds1* $\Delta$  and *hmsV* $\Delta$  are hypostatic to *myoE* $\Delta$  ([Figure 4D](#)) strongly suggested that this  
306 hypothetical complex acts through MyoE, although UDS1 and HMSV would not play an  
307 essential role in MyoE function.

308

309 The high yields of HMSV and MyoE recovered with their respective GFP-Traps  
310 immunoprecipitates ([Figure 4A](#)) strongly suggested that MyoE and HMSV are direct

311 interactors. This prediction was confirmed by co-immunoprecipitation experiments using  
312 MyoE and HMSV-HA3 expressed by coupled transcription-translation reactions primed  
313 with their respective cDNAs. The two proteins were combined and immunoprecipitated  
314 with  $\alpha$ -MyoE-specific IgGs or with IgGs raised against the unrelated protein Uso1 (acting  
315 in the ER/Golgi interface).  $\alpha$ -MyoE IgGs, but not  $\alpha$ -Uso1 IgGs, immunoprecipitated  
316 HMSV-HA3 (Figure 4F), establishing that HMSV and MyoE interact directly. In short, all  
317 the above data strongly suggested that HMSV acts as a connector between  
318 RAB11/UDS1 and MyoE.

319

320 Unlike UDS1, HMSV did not appear to interact with RAB11 in shotgun proteomic  
321 experiments (Figure 2A). To confirm this observation, we performed more sensitive GST-  
322 pull down assays with extracts of cells expressing HA3-tagged baits. Under conditions  
323 in which UDS1-HA3 strongly associated with RAB11-GST, HMSV-HA3 did not (Figure  
324 4G). Even though strong overexposure of the blots revealed a faint signal in the GTP $\gamma$ S-  
325 RAB11 lane, these data argued against HMSV being a direct interactor of RAB11 and  
326 suggested instead that another factor might bridge HMSV to RAB11 (note that total cell  
327 extracts—not purified proteins—were used as preys in this experiment).

328

### 329 **HMSV scaffolds a myosin-5-containing heterotrimeric complex that binds to the** 330 **active RAB11 conformer**

331 An appealing candidate to link HMSV indirectly to RAB11 was UDS1. Figure 5A shows  
332 that GST-UDS1, but not the unrelated bait GST-GFP, pulled-down *in vitro* synthesized  
333 HMSV-HA3. In contrast, neither GST bait pulled-down *in vitro* synthesized Uso1-HA3,  
334 confirming specificity and establishing that purified UDS1 and HMSV interact. Therefore,  
335 by interacting directly with both MyoE and UDS1, HMSV would act as scaffold of a  
336 heterotrimeric complex that is recruited by RAB11 to SVs by contacting both UDS1 and  
337 MyoE/myosin-5.

338

339 To test this model, we performed two sets of experiments. First, we demonstrated *in vitro*  
340 that HMSV is recruited to active RAB11 only if UDS1 is present to bridge the interaction  
341 (Figure 5B). We performed GST-RAB pull-downs in the presence of bacterially  
342 expressed UDS1, *in vitro* synthesized HMSV-HA3 or both. HMSV was recruited by  
343 GTP $\gamma$ S-RAB11, but did so only when UDS1 was present in the reaction mix. Neither  
344 conformation of RAB5b nor GDP-RAB11 pulled-down HMSV even when UDS1 was

345 present. We conclude that HMSV is an indirect effector of RAB11 that requires the  
346 presence of UDS1 to be recruited to the GTPase.

347

348 Secondly, we demonstrated that the stable complex reconstructed *in vitro*, consisting of  
349 MyoE, HMSV and UDS1, is present in cellular lysates and is scaffolded by HMSV. As  
350 determined by anti-MyoE Western blotting of GFP-Trap immunoprecipitates of whole-  
351 cell extracts, MyoE strongly associates with UDS1-GFP and with HMSV-GFP, but not  
352 with the unrelated bait Uso1-GFP (Figure 6A). Indeed, the associations are so efficient  
353 that co-immunoprecipitated MyoE could be visualized directly by silver-staining of SDS-  
354 PAGE gels (Figure 6A, right). Despite HMSV appears to be the less abundant bait (anti-  
355 GFP western blot, Figure 6A, right), the interaction between MyoE and HMSV was  
356 markedly more efficient than that between MyoE and UDS1, in agreement with the fact  
357 that MyoE and UDS1 interact indirectly by way of HMSV. Consistently, the interaction  
358 between MyoE and UDS1 was undetectable with *hmsV* $\Delta$  extracts (i.e. was completely  
359 dependent on the presence of HMSV) (Figure 6B), whereas than that between MyoE  
360 and HMSV was completely independent of UDS1, taking place irrespectively of whether  
361 wild-type or *uds1* $\Delta$  extracts were used (Figure 6C). Lastly, the interaction between  
362 UDS1-GFP and HMSV-HA3 was completely independent of MyoE (Figure 6D), as  
363 predicted by *in vitro* reconstitution experiments above.

364

365 Taken together these data show that these proteins form a complex in the order  
366 MyoE/HMSV/UDS1 that has the dual ability to interact with the active form of RAB11  
367 through UDS1- (Figures 3-5) and MyoE-mediated (Figure 1) contacts.

368

369 **Evidence that UDS1 and HMSV are a co-receptor assisting RAB11 to recruit**  
370 **myosin-5 to SVs.**

371 A diagnostic readout of myosin-5 transport is the focusing of SVs at the SPK. Consistent  
372 with UDS1 and HMSV acting in a complex regulating actomyosin transport, both *uds1* $\Delta$   
373 and *hmsV* $\Delta$  affected RAB11 SVs similarly, reallocating them from the SPK to a crescent-  
374 shaped distribution in the apical dome (Figure 7A). This effect was markedly less  
375 prominent than that caused by *myoE* $\Delta$ , which resulted in a broader crescent and, as  
376 discussed above, in a marked reduction of the signal of SVs docked at the tip cortex  
377 (Figure 1B). Therefore, these data strongly indicate that myosin-5 transport is debilitated  
378 in *uds1* $\Delta$  and *hmsV* $\Delta$  mutants, such that although this transport is not abolished,  
379 MT/kinesin-1-mediated transport gains prominence, which results in targeting SVs to a  
380 broader surface determined by the sites at which MTs' plus ends reach the apical dome.

381 Impairment of actomyosin transport in these mutants explains the partial exocytic deficit  
382 that growth tests indicate (Figure 4D).

383

384 All the above experiments suggested that the UDS1/HMSV complex might form part of  
385 a co-receptor reinforcing the RAB11-mediated recruitment of myosin-5 to SVs. Myosin-  
386 5 dwells in an inactive conformation that is shifted to the active conformation by cargo  
387 (Donovan & Bretscher, 2015). Thus, a deficit in cargo loading would be translated into a  
388 drop in myosin-5 activity, which should in turn result in a reduction in the levels of myosin-  
389 5 at the SPK. Figure 7A, and B shows that both *uds1* $\Delta$  and *hmsV* $\Delta$  reduce the SPK MyoE  
390 signal by 5-6-fold (a significant difference;  $P < 0.0001$  in unpaired *t*-tests), supporting the  
391 contention that in these mutant backgrounds the loading of myosin-5 with SVs is  
392 compromised. Movie 7 dynamically depicts the effect of *hmsV* $\Delta$  on the steady-state  
393 levels of MyoE accumulating at the SPK.

394

395 We next investigated the dependence of UDS1 and HMSV localization on each other. In  
396 *hmsV* $\Delta$  cells UDS1 delocalized from the SPK to an apical crescent remarkably similar to  
397 that observed with RAB11 (Figure 7A), indicating that the connection of UDS1 (RAB11)  
398 SVs with MyoE is impaired (recall that a broader distribution indicates that the balance  
399 between actomyosin and MT transport has been shifted towards the latter). In sheer  
400 contrast, HMSV is not delocalized from the SPK in *uds1* $\Delta$  cells, but the signal was  
401 reduced to an extent roughly commensurate with the reduction in MyoE signal (Figure  
402 7A and B), indicating that HMSV goes with the proportion of myosin-5 that is (less  
403 efficiently) loaded with cargo by way of the direct interaction of RAB11 with the motor,  
404 and therefore that HMSV binds indirectly to RAB11 by way of UDS1. Notably, the  
405 localization of RAB11, UDS1 and HMSV in *myoE* $\Delta$  cells is remarkably similar (Figure  
406 7A) (Movie 8 for HMSV), reflecting their dependence on MT transport in their distribution  
407 to the apical dome, and further demonstrating that UDS1 and HMSV are components of  
408 RAB11 SVs rather than structural constituents of the SPK.

409

#### 410 **Ablation of UDS1 or HMSV impairs the delivery of an exocytic cargo to the SPK**

411 A well characterized cargo of RAB11 SVs is the chitin synthase ChsB (Hernández-  
412 González et al., 2018a). This integral membrane protein is exocytosed to the apical  
413 plasma membrane by way of the SPK, diffuses away from the tip and it is taken up by a  
414 highly active endocytic collar that transports it to a sorting endosome. From this  
415 compartment ChsB returns to the TGN where it is incorporated into RAB11 SVs delivered  
416 to the SPK (Figure 8, scheme). In the wild-type, a proportion of ChsB is present in the

417 SPK. In *uds1* $\Delta$  and *hmsV* $\Delta$  cells this accumulation of ChsB in the SPK is no longer seen,  
418 resembling the situation with RAB11, which is included in [Figure 8](#) for comparison. We  
419 interpret that the absence of the UDS1/HMSV co-receptor affects transport of a RAB11  
420 cargo from the TGN to the SPK; (In passing, reduced delivery of ChsB to the apex might  
421 contribute to the morphological defect characteristic of *uds1* $\Delta$  and *hmsV* $\Delta$  hyphae).

422

423 In summary, our data strongly support a model in which the HMSV and UDS1, which are  
424 indirect and direct RAB11 effectors, respectively, serve as co-adaptor between SVs  
425 budding from the TGN and MyoE, the only *Aspergillus* myosin-5 motor ([Figure 9](#)). When  
426 this co-receptor is disorganized by the ablation of either of its two components,  
427 actomyosin transport of these SVs still occurs, albeit less efficiently, due to the direct  
428 interaction between RAB11 and MyoE.

429

## 430 **Discussion**

431

432 The ability of myosin-5 to transport cargo along actin filaments is crucial for the  
433 biogenesis and distribution of membranous compartments (Hammer & Sellers, 2012,  
434 Wong & Weisman, 2021). *A. nidulans* has a single myosin-5, MyoE (Taheri-Talesh et al.,  
435 2012), implying that specificity for different cargoes must be mediated by different  
436 adaptors, *i.e.* proteins engaging membranous organelles to the motor (Cross & Dodding,  
437 2019, Wong & Weisman, 2021). Adaptors often involve a RAB family member, exploiting  
438 the fact that individual RABs display a high selectivity for a cognate membrane  
439 compartment (Pfeffer, 2013, Pinar & Peñalva, 2021). RABs can interact directly with  
440 myosin-5, or indirectly, by means of intermediate proteins that bridge the activated RAB  
441 and the motor (Hammer & Sellers, 2012, Wong & Weisman, 2021). A well understood  
442 example of co-adaptor is melanophilin, which bridges RAB27 on melanosomes to MyoVa  
443 (Wu et al., 2002). Even if the binding of the RAB to the myosin-5 is direct, it frequently  
444 involves additional co-adaptors that help stabilizing the complex. This is the case of  
445 metazoan RAB11, FIP2 and MyoVb (FIP2 is a direct effector of RAB11), which form a  
446 tripartite complex required for traffic between recycling endosomes and the PM (Hales  
447 et al., 2002, Li et al., 2007, Schafer et al., 2014, Wang et al., 2008). Besides complex  
448 stabilization co-adaptors play additional roles. For example, the C-terminal region of  
449 melanophilin binds F-actin, and this binding dramatically increases the processivity of  
450 MyoVa (Sckolnick et al., 2013). Moreover, melanophilin tracks the plus-ends of MTs by  
451 hitchhiking on EB1. In turn, melanophilin recruits MyoVa to the MTs' plus ends, which  
452 might be mechanistically important to ensure the efficient transfer of melanosomes from

453 MTs to actin cables (Wu et al., 2005). Another example of additional functions of RAB-  
454 scaffolded myosin-5 adaptors occurs in mouse oocytes, where myosin-5 is recruited to  
455 RAB11 vesicles by cooperative interactions with both the GTPase and the actin  
456 nucleator SPIR-2, which helps coordinating MyoVa vesicle transport with actin  
457 nucleation (Pylypenko et al., 2016). Adaptors may play additional roles unrelated to  
458 transport itself. Notably, they may help to release the vesicle from myosin-5 upon arrival  
459 to destination: Phosphorylation and ubiquitin-mediated degradation of the yeast  
460 vacuolar adaptor Vps17 is required to release the organelle from Myo2 (Wong et al.,  
461 2020). We cannot rule out that UDS1 and HMSV play additional roles, such as retaining  
462 SVs in the SPK/vesicle supply center. For example, their *N. crassa* homologues, which  
463 are not involved in vesicle trafficking, have been proposed to act as polarity scaffolds  
464 (Zheng et al., 2020).

465

466 In *A. nidulans* the biogenesis of SVs dispatched to the PM is mediated by RAB11. SVs  
467 are loaded with myosin-5, kinesin-1 and dynein (Pantazopoulou et al., 2014, Peñalva et  
468 al., 2017), but the adaptors linking these molecular motors to vesicles remain  
469 uncharacterized. Resembling melanosome transport, kinesin-1 hauls SVs to tip-proximal  
470 regions before transferring them to myosin-5, which concentrates SVs at the SPK (the  
471 cell periphery, in the case of melanosomes). This two-step mechanism involves the  
472 transfer of SVs from MT- to F-actin-mediated transport, a relay that is almost certainly  
473 compromised by the high density of cytoskeletal tracks and organelles populating the  
474 hyphal tip. Genetic and biochemical evidence showed that RAB11 engages MyoE (=   
475 myosin-5) by way of a direct contact between the GTPase and the thoroughly studied  
476 GTD of the motor (GTD cargo binding domains of mammalian MyoVa,b,c and fungal  
477 Myo2 and MyoE are conserved (Pashkova et al., 2006, Pylypenko et al., 2013)). Yet we  
478 hypothesized that additional co-receptors were likely to be involved to facilitate an  
479 efficient relay and the subsequent MyoE-powered journey of SVs to the SPK across a  
480 crowded cytoplasm, and that these would be effectors of RAB11. Shotgun proteomics  
481 identified UDS1 and HMSV as components of a tripartite complex (see the model in  
482 [Figure 9](#)), in which at least one component, UDS1, is dimeric. UDS1 binds directly to  
483 both RAB11 and HMSV, and HMSV is a scaffold that binds directly to both MyoE and  
484 UDS1, connecting the motor to RAB11-UDS1. In agreement, in *hmsV* $\Delta$  cells UDS1-GFP  
485 distributes like RAB11 whereas in *uds1* $\Delta$  cells HMSV-GFP distributes like myosin-5,  
486 indicating that the whole receptor can be split in two stable subcomplexes ([Figure 7](#)).  
487 Therefore, both UDS1 and HMSV are necessary for the assembly of a receptor complex  
488 whose absence results in debilitated F-actin-mediated transport, which is reflected in the  
489 spreading of RAB11 SVs across the apical dome. Inefficient F-actin transport of RAB11

490 correlates with slower colony growth resulting from ablation of either co-adaptor, and  
491 spreading of RAB11 SVs across the hyphal tip dome correlates with delocalization of its  
492 cargo, ChsB, from the SPK. Of note, F-actin transport is not abolished without the co-  
493 adaptors (Figure 9), because RAB11 is able to bind MyoE directly, which makes the  
494 phenotypic consequences of ablating UDS1 or HMSV less deleterious than those  
495 resulting from removing MyoE, whose ablation leaves SV transport exclusively in the  
496 hands of kinesin-1.

497

498 As to how the presence of two additional proteins contributes to the efficiency of myosin-  
499 5 transport it is worth mentioning that in the absence of MyoE a proportion of RAB11  
500 SVs decorates the array of tip actin cables emanating from the SPK (Pantazopoulou et  
501 al., 2014), suggesting that these vesicles contain a F-actin-binder. It is tempting to  
502 speculate that MyoE co-adaptor(s) resemble melanophilin (Sckolnick et al., 2013) or the  
503 Sec4p::Myo2p co-adaptor Smy1p (Hodges et al., 2009, Lwin et al., 2016) in that they  
504 interact with actin cables to increase the processivity of the motor. Even more suggestive  
505 is the hypothetical possibility that F-actin binding by the MyoE co-adaptors facilitates the  
506 switch between MT and F-actin transport. It should be noted that Sec4 cannot recruit  
507 UDS1 (Figure 2E), which is consistent with the view that *A. nidulans* Sec4 acts  
508 downstream of the RAB11-mediated transport of SVs to the SPK, mediating the ultimate  
509 step of exocytosis (Pinar & Peñalva, 2021).

510

511 Our work highlights the fact that cargo adaptor proteins for myosin-5 are difficult to  
512 identify by primary sequence or domain composition-based searches (Wong &  
513 Weisman, 2021). Both UDS1 and HMSV are predicted coiled-coil proteins. Cross and  
514 Dodding have recently reviewed the frequent occurrence of coiled-coil proteins among  
515 adaptors of molecular motors, including myosin-5 (Cross & Dodding, 2019). A well-  
516 understood example is the coiled-coil melanosome protein RILPL2 (RAB interacting  
517 lysosomal protein-like 2), which bridges RAB36 with the MyoVa GTD (Matsui et al., 2012,  
518 Wei et al., 2013).

519

520 In summary, we have identified a novel receptor complex required for the efficient  
521 coupling of RAB11 SVs to the myosin-5 MyoE. Proof-of-concept that a motor-cargo  
522 interface can be targeted by a small chemical has been recently provided (Randall et al.,  
523 2017). Although speculative at the moment, the possibility of interfering with fungal  
524 growth by diminishing the efficiency of myosin-5 mediated transport is appealing.

525

## 526 **Methods**

### 527 **Aspergillus techniques**

528 Standard *A. nidulans* media were used for strain propagation and conidiospore  
529 production. GFP and epitope-tagged alleles were introduced in the different genetic  
530 backgrounds by meiotic recombination (Todd et al., 2007) and/or transformation (Tilburn  
531 et al., 1983), which used recipient *nkuA*Δ strains deficient in the non-homologous end  
532 joining pathway (Nayak et al., 2005). Complete strain genotypes are listed in Table S1.

### 533 **Null mutant strains and protein tagging**

534 *uds1*Δ, *hmsV*Δ, *sec4*Δ (Pantazopoulou et al., 2014) and *myoE*Δ (Taheri-Talesh et al.,  
535 2012) were constructed by transformation-mediated gene replacement with cassettes  
536 made by fusion PCR carrying appropriate selectable markers (Szewczyk et al., 2006).  
537 Integration events were confirmed by PCR with external primers.

538

539 The following proteins were C-terminally tagged endogenously, using cassettes  
540 constructed by fusion PCR (Nayak et al., 2005, Szewczyk et al., 2006): UDS1-GFP,  
541 UDS1-HA3, UDS1-tdTomato, HMSV-GFP, HMSV-HA3, MyoE-GFP (Taheri-Talesh et  
542 al., 2012), MyoE-mCherry and ChsB-GFP (Hernández-González et al., 2018a). GFP-  
543 RAB11 (Pantazopoulou et al., 2014) and mCherry-RAB11 (Pinar & Peñalva, 2020) were  
544 expressed from its own promoter.

545

### 546 **GFP-GTD transgene**

547 A transforming cassette consisting of, from 5' to 3', the sucrose-inducible promoter of the  
548 inulinase gene (*inuA*) (Hernández-González et al., 2018b), the GFP-coding sequence  
549 translationally fused to the coding sequence for residues 1082 through 1569 of MyoE,  
550 the *A. fumigatus pyrG* gene and the *inuA* gene 3'-flanking region was constructed by 5-  
551 way fusion PCR, using the following primers (underlined sequences indicate regions of  
552 overlap used for fusion PCRs):

553 (1): *inuA* promoter region, PCR-amplified with primers:

554 5'-GTGGAGGCCACTCTCGGAAAC-3'

555 5'-CAGTGAAAAGTTCTTCTCCTTTACTCATTTTGGTGATGTCGCTGACCGC-3'

556 (the underlined overlapped with GFP-coding region)

557 (2): GFP-(Gly-Ala)<sub>6</sub>

558 5'- ATGAGTAAAGGAGAAGAACTTTTC-3'

559 5'- GGCACCGGCTCCAGCGCCTGC-3'



560 (3): MyoE-GTD  
561 5'- CTGGTGCAGGCGCTGGAGCCGGTGCCCAGGCGTTGAACGGAGACCAGC-  
562 3': [the underlined overlapping with the GFP-(Gly-Ala)<sub>6</sub>] coding region.  
563 5'- ATTCCAGCACACTGGCGGCCGTTACTTACTCCATCACCCATTCTCAG-3':  
564 (the underlined overlapping with *pyrGaf*)  
565 (4): *pyrGaf*  
566 5'- GTAACGGCCGCCAGTGTGCTG-3'  
567 5'- GTCTGAGAGGAGGCACTGATG-3'  
568 (5): *inuA* 3'-UTR  
569 5'- ACGCATCAGTGCCTCCTCTCAGACAGGATCTAGCTAGATGTTTTGTTG-3':  
570 5'- CAGCAGTCAAGCAATACCAAGC-3'  
571 (the underlined overlapping with *pyrGaf*).

572

573 The cassette was used to replace the *inuA* gene, considered to be a safe haven, by  
574 homologous recombination. *inuA*Δ does not affect growth on carbon sources other than  
575 inulin (glucose is used as standard carbon source in *A. nidulans* media).

576

### 577 **Myosin-5 mutants**

578 A DNA cassette consisting of the 1478 3'-coding nucleotides of *myoE*, the *A. fumigatus*  
579 *pyrGaf* gene and 870 nucleotides of the *myoE* 3'-UTR region was cloned in pGEM-T  
580 easy (Promega). This plasmid was used as template for site-directed mutagenesis  
581 (QuickChange kit, Agilent Technologies) with the following oligonucleotides:

582 (a) Y1414R (genomic sequence coordinates T4391C A4392G):

583 Fw: 5'- GAGGCCTCCAGATCAACCGCAACATAACTCGCATCGAG-3'

584 Rv: 5'- CTCGATGCGAGTTATGTTGCGGTTGATCTGGAGGCCTC-3'

585 (b) K1472E (A4658G):

586 Fw: 5'- CTCTCCAAACCAAATCCAAGAGCTGCTAAACCAATACCT-3'

587 Rv: 5'- AGGTATTGGTTTAGCAGCTCTTGGATTTGGTTTGGAGAG-3'

588 Wild-type and mutant DNA cassettes, obtained after *NotI* digestion, were used to  
589 transform strain MAD5736. Transformants incorporating the wild-type and mutant *myoE*  
590 alleles were identified by PCR and confirmed by DNA sequencing. A transformant  
591 carrying the wild-type cassette was indistinguishable from the 'true' wild-type in terms of  
592 growth.

### 593 **Plasmids for protein expression**

#### 594 GST constructs

595 pET21b-RAB11-GST: carries cDNA encoding cysteine-less RAB11 with GST C-  
596 terminally attached. *NdeI/BamHI* insert in pET21b.

597 pET21b- Sec4-GST: carries cDNA encoding cysteine-less Sec4 with GST C-terminally  
598 attached. *NdeI/XhoI* insert in pET21b.

599 pET21b-RAB5b-GST: carries cDNA encoding cysteine-less RAB5b with GST C-  
600 terminally attached. *NheI/NotI* insert in pET21b.

601 Note that in all three constructs GST is attached to the C-termini of the RABs, and that  
602 they all include a stop codon after the GST coding region to interrupt translation before  
603 the His tag.

604 pGEX2T-GFP: pGEX-2T derivative encoding a GST-sGFP fusion.

605 pGEX2T-UDS1: UDS1 cDNA cloned as *BamHI* in pGEX-2T (N-terminal GST)

606

#### 607 TNT expression constructs

608 pSP64 MyoE: MyoE cDNA cloned as a *BamHI* fragment in Promega's pSP64 poly (A).

609 pSP64 HMSV-HA: C-terminally HA3-tagged cDNA encoding HMSV cloned as

610 *PstI/XmaI* in Promega's pSP64 poly (A).

611 pSP64 UsoA-HA: C-terminally HA3-tagged cDNA encoding Uso1 cloned as *PstI/XmaI*  
612 in Promega's pSP64 poly (A).

613

#### 614 UDS1-His6 construct

615 pET21b-UDS1: UDS1 cDNA cloned as *NheI/NotI* in pET21b

616

#### 617 ***In vitro* transcription/translation**

618 Proteins were synthesized using TNT® SP6 Quick Coupled Transcription/Translation  
619 system (Promega L2080) using the standard reaction mix (rabbit reticulocyte lysate plus  
620 amino acids) supplemented with 20 µM methionine. Reactions were primed with 1 µg of  
621 purified, circular pSP64 derivatives, which were purified using NucleoBond Xtra-Midi  
622 columns (Macherey Nagel, FRG).

623

#### 624 **Antibodies and western blotting**

625 Antisera against MyoE and Uso1 were raised in rabbits by Davids Biotechnology  
626 (<https://www.davids-bio.com>). Animals were immunized with His6-tagged polypeptides  
627 containing residues 1082-1569 of MyoE (the GTD) or residues 1-659 of USO1. These  
628 polypeptides were purified by Ni<sup>2+</sup> affinity chromatography after expression in *E. coli*  
629 BLB21 as described (Pinar et al., 2015). Antibodies against the target proteins were

630 purified from raw antisera (40 ml) by affinity chromatography with the respective  
631 antigens, previously coupled to 1 ml HI-TRAP NHS columns (GE/Merck) packed with  
632 Sepharose pre-activated for covalent coupling of ligands containing primary amino  
633 groups, following instructions of the manufacturer. Antibodies were eluted with 100 mM  
634 glycine, pH 3.0, neutralized with 2M Tris, pH 7.5 and stored at -20°C.

635

636 Western blots were reacted with the following antibodies:

637 For HA3-tagged proteins:  $\alpha$ -HA rat mAb (1/1,000) (Roche) as primary antibody, and  
638 HRP-conjugated  $\alpha$ -rat IgM+IgG, as secondary antibodies (Southern Biotechnology;  
639 (1:4,000).

640 For His6-tagged UDS1:  $\alpha$ -His primary antibody (1/10,000; Clontech) and HRP-  
641 conjugated goat anti-mouse IgG (H+L) secondary antibodies (Jackson ImmunoResearch,  
642 1/5000).

643 For MyoE: MyoE/myosin-5 was detected with a custom-made  $\alpha$ -MyoE-GTD antiserum  
644 (1/4000; see above) and donkey HRP-coupled  $\alpha$ -rabbit IgG (GE NA-934) as secondary  
645 antibodies.

646 For  $\alpha$ -GFP western blotting: we used Roche's mixture of two mouse mAbs (1/5000) as  
647 primary antibodies and HRP-conjugated AffiniPure goat anti-mouse IgG (H+L)  
648 secondary antibodies (Jackson ImmunoResearch, 1/5000). In all cases reacting bands  
649 were detected with Clarity western ECL substrate (Biorad Laboratories).

650

### 651 **RAB-GST purification and nucleotide loading**

652 500 ml bacterial cultures in LB plus antibiotics as appropriate were incubated at 37°C  
653 until reaching a O.D. of 0.6-0.8 at 600 nm. These primary cultures were induced with 0.1  
654 mM IPTG, transferred to a 15°C incubator and shaken for an additional 20 h. Cells were  
655 collected by centrifugation and stored at -80°C. A pellet corresponding to 250 ml of the  
656 culture was resuspended in PBS containing Roche's cOmplete™ protease inhibitor  
657 cocktail, 0.2 mg/ml lysozyme and 1  $\mu$ g/ml of DNase I (Abenza et al., 2010) and lysed in  
658 a French Press. After centrifugation at 30,000 x g and 4°C for 30 min, the supernatant  
659 was mixed with 300  $\mu$ l of glutathione-Sepharose 4B (Sigma) and incubated at 4°C for 1  
660 h in a rotating wheel. Sepharose-bound RABs were resuspended in a buffer consisting  
661 of 25 mM HEPES PH 7.5, 110 mM KCl, 1 mM DTT, 10 mM EDTA and 125  $\mu$ M GDP o  
662 GTP $\gamma$ S and incubated for 30 min at 30°C with gentle rocking. Beads were then washed  
663 twice with nucleotide loading buffer (as above, but containing 10 mM Cl<sub>2</sub>Mg instead of  
664 10 mM EDTA) before incubating them overnight at 25°C with gentle rocking in nucleotide

665 loading buffer containing GDP or GTP $\gamma$ S (Jena Bioscience UN-1172 and UN-412,  
666 respectively).

667

#### 668 **UDS1-His6 expression and purification from bacteria**

669 *E. coli* cells (BLB21 pRIL) carrying pET21b-UDS1 were cultured at 37°C in LB containing  
670 ampicillin and chloramphenicol until reaching and OD<sup>660</sup> of 0.5. At this point cultures were  
671 induced with 0.1 M IPTG, transferred to 15°C and incubated overnight before collecting  
672 cells by centrifugation and storing pellets at -80°C. Bacterial pellets were thawed,  
673 resuspended in 25 ml of lysis buffer (as for RAB-GST proteins), incubated for 30 min in  
674 ice, and lysed with a French Press. Lysates were clarified by centrifugation (30,000 x at  
675 for 30 min at 4°C and purified in a Ni-Sepharose High Performance column. Imidazole  
676 (0.4 M) present in the eluted fraction was removed with a PD-10 column equilibrated in  
677 PBS, pH 7.4 containing 5% glycerol and 1 mM DTT. The eluate (3.5 ml) was loaded onto  
678 a HiLoad 16/600 Superdex pg column that was run at 1 ml/min. Fractions containing  
679 protein were analyzed by SDS-PAGE, stained with Coomassie and pooled as  
680 appropriate.

681

#### 682 **Total cell extracts**

683 These were carried out as described (Pinar et al., 2019). 70 mg of lyophilized mycelia  
684 were ground to a fine powder in 2 ml tubes containing a ceramic bead and a 20 sec pulse  
685 of a FastPrep set at power 4. The powder was suspended in 1.5 ml of 'low KCl buffer'  
686 (25 mM HEPES, pH 7.5, 110 mM KCl, 5 mM MgCl<sub>2</sub>, 1 mM DTT and 0.1% Triton)  
687 containing 10% (v/v) glycerol, complete ULTRA Tablets inhibitor cocktail (Roche) and ~  
688 100  $\mu$ l of 0.6 mm glass beads. The resulting suspension was homogenized with a 15 sec  
689 full-power pulse of the FastPrep and proteins were extracted after incubation for 10 min  
690 at 4°C in a rotating wheel. This extraction step was repeated two additional times before  
691 the resulting homogenate was clarified by centrifugation at 15,000 x g and 4°C in a  
692 refrigerated microcentrifuge.

693

#### 694 **RAB-GST pull-downs with total cell extracts**

695 6 mg of each extract were mixed with 10  $\mu$ l of nucleotide-loaded RAB-GST baits in a  
696 total volume of 0.4 ml in 0.8 ml Pierce centrifuge columns and the mixtures were  
697 incubated for 2 h at 4°C in a rotating wheel. GST-Sepharose beads were collected by  
698 low speed centrifugation, washed four times with 0.7 ml of 'medium KCl buffer' (25 mM

699 HEPES pH 7.5, 175 mM KCl, 5mM MgCl<sub>2</sub>, 1 mM DTT and 0,1% Triton X-100) before  
700 bound material was eluted with 20 µl of Laemmli loading buffer. 15 µl were run in 7.5%  
701 polyacrylamide gels that were analyzed by α-HA western blotting and 2µl were run in a  
702 10% polyacrylamide gel for Coomassie staining of the baits.

703

#### 704 **RAB-GST pull-downs with purified proteins**

705 Binding reactions were carried out in 0.8 ml Pierce centrifuge columns. Nucleotide-  
706 loaded RABs (10 µl of glutathione-Sepharose beads) were mixed with either 2.5 µg of  
707 purified UDS1-His6 or with 10 µl of TNT reaction mix primed with appropriate plasmids  
708 (pSP64-MyoE, pSP64-HMSV-HA3 or pS64-Uso1-HA3), in 0.4 ml of 'medium KCl' buffer  
709 containing 10% glycerol. The resulting mix was incubated for 2 h at 4°C in a rotating  
710 wheel. Beads were collected by low-speed microcentrifugation and washed four times in  
711 the same buffer before eluting bound material with 20 µl of Laemmli loading buffer. 5 µl  
712 aliquots were analyzed by western blotting using α-His antibody (for UDS1-His6) or α-  
713 HA antibody (for HMSV-HA3) and 7.5% polyacrylamide gels, or α-MyoE antibodies and  
714 Biorad's pre-casted 4-15% polyacrylamide gels (for MyoE).

715

#### 716 **Pull-down of the UDS1-HMSV complex with RAB11-GST**

717 10 µl of glutathione-Sepharose beads loaded with RAB11-GST GTPγS or GDP were  
718 incubated in Pierce microcolumns for 2 h at 4°C with 2.5 µg of UDS1-His6 and 10 µl of  
719 TNT-synthesized HMSV-HA3 in 400 µl of 'low KCl' buffer containing 10% glycerol. Beads  
720 were washed four times with 'medium KCl' buffer. Equal amounts of bound material were  
721 analyzed by western blotting using α-HA3 and α-His antibodies.

722

#### 723 **Pull-down with GST-UDS1**

724 GST-UDS1 was purified as described for RAB-GST proteins. 15 µl of glutathione-  
725 Sepharose beads containing bait protein fusions were mixed with 10 µl of TNT®-  
726 synthesized HMSV-HA3 or Uso1-HA3 preys (10 µl of each reaction mix) in 0.4 ml of 25  
727 mM HEPES pH 7.5, 300 mM KCl, 0.5% Triton, 0.5 mM EDTA and 1 mM DTT, using  
728 Pierce microcolumns, which were incubated for 2 h at 4°C in a rotating wheel. Beads  
729 were washed four times with the same buffer and eluted with 20 µl of Laemmli buffer. 5  
730 µl aliquots were analyzed by α-HA western blotting.

731

## 732 **ProtA immunoprecipitations**

733 For  $\alpha$ -MyoE co-immunoprecipitation experiments of HMSV-HA3, 5  $\mu$ l samples of Protein  
734 A-Sepharose (GE Healthcare) were preincubated with 10  $\mu$ l each of purified  $\alpha$ -MyoE or  
735  $\alpha$ -Uso1 antibodies for 3 h at room temperature. Antibody-loaded beads were mixed with  
736 25  $\mu$ l of TNT-synthesized MyoE and 25  $\mu$ l of TNT-synthesized HMSV-HA3 in 0.4 ml of  
737 25 mM HEPES pH 7.5, 500 mM NaCl, 0.5% Triton, 0.5 mM EDTA and 2% BSA, using  
738 0.8 ml Pierce microcolumns. Beads were recovered by microcentrifugation, washed four  
739 times in the same buffer (without BSA) and eluted with 20  $\mu$ l of Laemmli loading buffer.  
740 5  $\mu$ l of each sample were analyzed by western blot (7.5 % polyacrylamide gel) using  $\alpha$ -  
741 HA mAb. A gel run in parallel was stained with Coomassie blue to assess equal loading  
742 of Protein A beads with IgG heavy chains.

743

## 744 **GFP-Trap and western blotting**

745 Cell extracts [strains, MyoE-GFP (MAD4406), UDS1-GFP (MAD6379), HMSV-GFP  
746 (MAD7326) and Uso1-GFP (MAD6358)] were prepared as described above, but using  
747 the lysis buffer recommended by the manufacturer, which containing 25 mM Tris-HCl pH  
748 7.5, 150 mM NaCl, 0.5 mM EDTA, 0.5% NP40 and Roche's cOmplete protease  
749 inhibitors. Approximately 100 mg of total protein (4 ml of extract) were  
750 immunoprecipitated with 25  $\mu$ l of GFP-Trap magnetic agarose beads (Chromotek gtma-  
751 20) following incubation for 2 h at 4°C in a rotating wheel. Beads were washed four times  
752 with the same buffer before eluting the immunoprecipitated material with 60  $\mu$ l of  
753 Laemmli buffer. 10  $\mu$ l aliquots were analyzed by  $\alpha$ -HA3 western blotting (7.5%  
754 polyacrylamide gels) or  $\alpha$ -MyoE western blotting. 2  $\mu$ l were analyzed by  $\alpha$ -GFP western  
755 blotting to determine levels of immunoprecipitated baits. Lastly 8  $\mu$ l were analyzed by  
756 SDS-PAGE and silver staining.

## 757 **Shotgun proteomic analysis of RAB11-GST effectors**

758

759 Large scale purification of proteins interacting with the GDP and GTP $\gamma$ S forms of RAB11-  
760 GST was carried out as described previously for GST-RAB11 (Pinar & Peñalva, 2017).  
761 Bound proteins were loaded onto a 10% polyacrylamide gel, which was run until proteins  
762 moved 1 cm into the gel. The protein mixture band was detected by colloidal Coomassie  
763 staining, excised and processed for tryptic digestion and subsequent analysis by MS/MS  
764 essentially as described (Pinar et al., 2019). For MS/MS analyses of GFP-tagged bait  
765 associates, proteins were digested using the 'on-bead digest protocol for mass

766 spectrometry following immunoprecipitation with Nano-Traps' recommended by  
767 Chromotek. In both cases mass spectra \*.raw files were used to search the *A. nidulans*  
768 FGSC A4 version\_s10m02-r03\_orf\_trans\_allMODI proteome database (8223 protein  
769 entries) using Mascot search engine version 2.6 (Matrix Science). Peptides were filtered  
770 using Percolator (Kall et al., 2007), with a q-value threshold set to 0.01.

#### 771 **Analytical ultracentrifugation**

772  
773 Sedimentation equilibrium analysis of UDS1-His was carried out in the Molecular  
774 Interactions Facility of the Centro de Investigaciones Biológicas using an XL-A analytical  
775 ultracentrifuge (Beckman-Coulter Inc.) equipped with a UV-VIS detector set at 237 nm.  
776 Centrifugation was carried out in short (95  $\mu$ l) columns at speeds ranging from 6000 to  
777 9000 rpm, with a last high-speed (48,000 rpm) run to deplete the protein from the  
778 meniscus and obtain the corresponding baseline offsets. Weight-average buoyant  
779 molecular weights were determined by fitting, using HeteroAnalysis software (Cole,  
780 2004), a single-species model to the experimental data (corrected for temperature and  
781 solvent composition with SEDNTERP software (Laue, 1992)).

#### 782 **Negative staining electron microscopy.**

783  
784 Purified UDS1 was diluted to 0.2  $\mu$ M in 150 mM NaCl, 25 mM HEPES pH 7.5 and 5%  
785 glycerol, and stained with 2% (w/v) uranyl acetate. Specimens were examined under a  
786 JEOL 1230 electron microscope equipped with a TVIPS CMOS 4kx4k camera and  
787 operated at 100 kV. Data were collected at a nominal magnification of 40,000x, which  
788 corresponds to 2.84  $\text{\AA}$ /pixel at the micrograph level. The length of 71 representative  
789 particles selected from multiple micrographs was measured using ImageJ.

#### 790 **Fluorescence Microscopy**

791  
792 Hyphae were cultured in watch minimal medium (WMM) (Peñalva, 2005). Microscopy  
793 chambers, hardware, software and image acquisition procedures have been thoroughly  
794 documented (Pinar & Peñalva, 2020), with the sole exception that some of the  
795 experiments using the Hamamatsu Gemini beam splitter were carried out in a Leica DMI8  
796 inverted microscope instead of a Leica DMI6000. Z-stacks were deconvolved using  
797 Huygens Professional software (Hilversum, Holland), version 20.04.0p5 64 bits. Images  
798 (usually MIPs unless otherwise indicated) were contrasted with Metamorph (Molecular  
799 Dynamics) and annotated using Corel Draw. Movies were assembled with Metamorph  
800 and compressed using QuickTime (Apple Inc.). Quantitation of average MyoE-GFP

801 signals in the SPK was made using MIPs of raw images. Datasets were analyzed with  
802 Prism 3.02.

### 803 **Statistical analysis**

804 It is described in the legend to Figure 7. Analysis was carried out with GraphPad Prism  
805  
806

### 807 **Acknowledgements**

808 We thank Juan M. Luque (Molecular Interactions Facility, Centro de Investigaciones  
809 Biológicas) for his help with equilibrium sedimentation analyses, Elena Reoyo for skillful  
810 technical assistance and Herb Arst for critical reading of the manuscript. Thanks are due  
811 to Spain's Ministerio de Ciencia e Innovación for grants RTI2018-093344-B100 (MAP)  
812 and BFU2017-89143-P (EA-P), as well as for grant-associated Predoctoral contracts  
813 BES-2016-077440 (IB.-P/MAP) and PRE2018-086026 (to AG/EA-P). Thanks are also  
814 due to the Comunidad de Madrid grant for S2017/BMD-3691 (MAP). Grants were co-  
815 funded by European Regional Development and European Social Funds. The authors  
816 declare that they do not have any competing financial interests.

817

### 818 **Authors Contributions**

819 MP, AA and IB-P carried out biochemical and genetic experiments. VdR conducted  
820 MS/MS analyses, EA-P and AG conducted electron microscopy experiments and MAP  
821 carried out fluorescence protein localization analyses, supervised the project and, with  
822 MP, wrote the manuscript with input from all authors.

823

### 824 **Conflicts of interest**

825 The authors declare that they do not have any conflict of interest

826



827

## 828 **References**

- 829 Abenza JF, Galindo A, Pantazopoulou A, Gil C, de los Ríos V, Peñalva MA (2010)  
830 *Aspergillus* RabB<sup>Rab5</sup> integrates acquisition of degradative identity with the long-  
831 distance movement of early endosomes. *Mol Biol Cell* 21: 2756-2769
- 832 Bielska E, Schuster M, Roger Y, Berepiki A, Soanes DM, Talbot NJ, Steinberg G  
833 (2014) Hook is an adapter that coordinates kinesin-3 and dynein cargo attachment on  
834 early endosomes. *J Cell Biol* 204: 989-1007
- 835 Cole JL (2004) Analysis of heterogeneous interactions. *Methods Enzymol* 384: 212-32
- 836 Cross JA, Dodding MP (2019) Motor–cargo adaptors at the organelle–cytoskeleton  
837 interface. *Current Opinion in Cell Biology* 59: 16-23
- 838 Donovan KW, Bretscher A (2015) Head-to-tail regulation is critical for the in vivo  
839 function of myosin V. *J Cell Biol* 209: 359-365
- 840 Goldenring JR (2015) Recycling endosomes. *Current Opinion in Cell Biology* 35: 117-  
841 122
- 842 Hales CM, Vaerman J-P, Goldenring JR (2002) Rab11 Family Interacting Protein 2  
843 Associates with Myosin Vb and Regulates Plasma Membrane Recycling. *J Biol Chem*  
844 277: 50415-50421
- 845 Hammer JA, 3rd, Sellers JR (2012) Walking to work: roles for class V myosins as cargo  
846 transporters. *Nat Rev Mol Cell Biol* 13: 13-26
- 847 Hernández-González M, Bravo-Plaza I, Pinar M, de los Ríos V, Arst HN, Jr., Peñalva  
848 MA (2018a) Endocytic recycling via the TGN underlies the polarized hyphal mode of  
849 life. *PLoS Genetics* 14: e1007291
- 850 Hernández-González M, Pantazopoulou A, Spanoudakis D, Seegers CLC, Peñalva MA  
851 (2018b) Genetic dissection of the secretory route followed by a fungal extracellular  
852 glycosyl hydrolase. *Mol Microbiol* 109: 781-800
- 853 Hodges AR, Bookwalter CS, Kremontsova EB, Trybus KM (2009) A nonprocessive  
854 class V myosin drives cargo processively when a kinesin- related protein is a  
855 passenger. *Curr Biol* 19: 2121-5
- 856 Hohmann-Marriott MF, Uchida M, van de Meene AM, Garret M, Hjelm BE, Kokoori S,  
857 Roberson RW (2006) Application of electron tomography to fungal ultrastructure  
858 studies. *New Phytol* 172: 208-220
- 859 Ikebe C, Konishi M, Hirata D, Matsusaka T, Toda T (2011) Systematic localization  
860 study on novel proteins encoded by meiotically up-regulated ORFs in fission yeast.  
861 *Biosci Biotechnol Biochem* 75: 2364-70
- 862 Jin Y, Sultana A, Gandhi P, Franklin E, Hamamoto S, Khan AR, Munson M, Schekman  
863 R, Weisman LS (2011) Myosin V transports secretory vesicles via a Rab GTPase  
864 cascade and interaction with the exocyst complex. *Dev Cell* 21: 1156-70

- 865 Kall L, Canterbury JD, Weston J, Noble WS, MacCoss MJ (2007) Semi-supervised  
866 learning for peptide identification from shotgun proteomics datasets. *Nat Methods* 4:  
867 923-5
- 868 Laue TM, Shah, B.D., Ridgeway, T.M. and Pelletier, S.L (1992) Interpretation of  
869 analytical sedimentation data for proteins. In *Analytical Ultracentrifugation in*  
870 *Biochemistry and Polymer Science* Harding SE, Rowe, A.J. and Horton, J.C. (ed) pp  
871 90-125. Cambridge: Royal Society of Chemistry
- 872 Li BX, Satoh AK, Ready DF (2007) Myosin V, Rab11, and dRip11 direct apical  
873 secretion and cellular morphogenesis in developing *Drosophila* photoreceptors. *J Cell*  
874 *Biol* 177: 659-669
- 875 Lipatova Z, Tokarev AA, Jin Y, Mulholland J, Weisman LS, Segev N (2008) Direct  
876 interaction between a myosin V motor and the Rab GTPases Ypt31/32 is required for  
877 polarized secretion. *Mol Biol Cell* 19: 4177-87
- 878 Lwin KM, Li D, Bretscher A (2016) Kinesin-related Smy1 enhances the Rab-dependent  
879 association of myosin-V with secretory cargo. *Mol Biol Cell*
- 880 Matsui T, Ohbayashi N, Fukuda M (2012) The Rab interacting lysosomal protein (RILP)  
881 homology domain functions as a novel effector domain for small GTPase Rab36:  
882 Rab36 regulates retrograde melanosome transport in melanocytes. *J Biol Chem* 287:  
883 28619-31
- 884 Nayak T, Szewczyk E, Oakley CE, Osmani A, Ukil L, Murray SL, Hynes MJ, Osmani  
885 SA, Oakley BR (2005) A versatile and efficient gene targeting system for *Aspergillus*  
886 *nidulans*. *Genetics* 172: 1557-1566
- 887 Pantazopoulou A, Pinar M, Xiang X, Peñalva MA (2014) Maturation of late Golgi  
888 cisternae into RabE<sup>RAB11</sup> exocytic post-Golgi carriers visualized *in vivo*. *Mol Biol Cell*  
889 25: 2428-2443
- 890 Pashkova N, Jin Y, Ramaswamy S, Weisman LS (2006) Structural basis for myosin V  
891 discrimination between distinct cargoes. *EMBO J* 25: 693-700
- 892 Peñalva MA (2005) Tracing the endocytic pathway of *Aspergillus nidulans* with FM4-  
893 64. *Fungal Genet Biol* 42: 963-975
- 894 Peñalva MA, Zhang J, Xiang X, Pantazopoulou A (2017) Transport of fungal RAB11  
895 secretory vesicles involves myosin-5, dynein/dynactin/p25 and kinesin-1 and is  
896 independent of kinesin-3. *Mol Biol Cell* 28: 947-961
- 897 Pfeffer SR (2013) Rab GTPase regulation of membrane identity. *Curr Opin Cell Biol*  
898 25: 414-9
- 899 Pinar M, Arias-Palomo E, de los Ríos V, Arst HN, Jr., Peñalva MA (2019)  
900 Characterization of *Aspergillus nidulans* TRAPPs uncovers unprecedented similarities  
901 between fungi and metazoans and reveals the modular assembly of TRAPP. *PLOS*  
902 *Genetics* 15: e1008557
- 903 Pinar M, Arst HN, Jr., Pantazopoulou A, Tagua VG, de los Ríos V, Rodríguez-Salarichs  
904 J, Díaz JF, Peñalva MA (2015) TRAPP. II regulates exocytic Golgi exit by mediating  
905 nucleotide exchange on the Ypt31 orthologue RabE/RAB11. *Proc Natl Acad Sci USA*  
906 112: 4346-4351

- 907 Pinar M, Peñalva MA (2017) *Aspergillus nidulans* BapH is a RAB11 effector that  
908 connects membranes in the Spitzenkörper with basal autophagy. *Mol Microbiol* 106:  
909 452-468
- 910 Pinar M, Peñalva MA (2020) *En bloc* TGN recruitment of *Aspergillus* TRAPP II reveals  
911 TRAPP maturation as unlikely to drive RAB1-to-RAB11 transition. *J Cell Sci* 133:  
912 jcs241141
- 913 Pinar M, Peñalva MA (2021) The fungal RABOME: RAB GTPases acting in the  
914 endocytic and exocytic pathways of *Aspergillus nidulans* (with excursions to other  
915 filamentous fungi). *Mol Microbiol in press*
- 916 Pylypenko O, Attanda W, Gauquelin C, Lahmani M, Coulibaly D, Baron B, Hoos S,  
917 Titus MA, England P, Houdusse AM (2013) Structural basis of myosin V Rab GTPase-  
918 dependent cargo recognition. *Proceedings of the National Academy of Sciences* 110:  
919 20443-20448
- 920 Pylypenko O, Welz T, Tittel J, Kollmar M, Chardon F, Malherbe G, Weiss S, Michel  
921 CIL, Samol-Wolf A, Grasskamp AT, Hume A, Goud B, Baron B, England P, Titus MA,  
922 Schulle P, Weidemann T, Houdusse A, Kerkhoff E (2016) Coordinated recruitment of  
923 Spir actin nucleators and myosin V motors to Rab11 vesicle membranes. *eLife* 5:  
924 e17523
- 925 Qiu R, Zhang J, Xiang X (2019) LIS1 regulates cargo-adaptor-mediated activation of  
926 dynein by overcoming its autoinhibition in vivo. *J Cell Biol* 218: 3630-3646
- 927 Randall TS, Yip YY, Wallock-Richards DJ, Pfisterer K, Sanger A, Ficek W, Steiner RA,  
928 Beavil AJ, Parsons M, Dodding MP (2017) A small-molecule activator of kinesin-1  
929 drives remodeling of the microtubule network. *Proc Natl Acad Sci USA* 114: 13738-  
930 13743
- 931 Roland JT, Bryant DM, Datta A, Itzen A, Mostov KE, Goldenring JR (2011) Rab  
932 GTPase-Myo5B complexes control membrane recycling and epithelial polarization.  
933 *Proc Natl Acad Sci USA* 108: 2789-2794
- 934 Santiago-Tirado FH, Legesse-Miller A, Schott D, Bretscher A (2011) PI4P and Rab  
935 inputs collaborate in myosin-V-dependent transport of secretory compartments in  
936 yeast. *Dev Cell* 20: 47-59
- 937 Schafer JC, Baetz NW, Lapierre LA, McRae RE, Roland JT, Goldenring JR (2014)  
938 Rab11-FIP2 interaction with MYO5B regulates movement of Rab11a-containing  
939 recycling vesicles. *Traffic* 15: 292-308
- 940 Schuchardt I, Aßmann D, Thines E, Schuberth C, Steinberg G (2005) Myosin-V,  
941 Kinesin-1, and Kinesin-3 Cooperate in Hyphal Growth of the Fungus *Ustilago maydis*.  
942 *Mol Biol Cell* 16: 5191-5201
- 943 Sckolnick M, Kremmentsova EB, Warshaw DM, Trybus KM (2013) More than just a  
944 cargo adapter, melanophilin prolongs and slows processive runs of myosin Va. *J Biol*  
945 *Chem* 288: 29313-22
- 946 Sharpless KE, Harris SD (2002) Functional characterization and localization of the  
947 *Aspergillus nidulans* formin SEPA. *Mol Biol Cell* 13: 469-479

- 948 Szewczyk E, Nayak T, Oakley CE, Edgerton H, Xiong Y, Taheri-Talesh N, Osmani SA,  
949 Oakley BR (2006) Fusion PCR and gene targeting in *Aspergillus nidulans*. *Nat Protoc*  
950 1: 3111-20
- 951 Taheri-Talesh N, Xiong Y, Oakley BR (2012) The Functions of Myosin II and Myosin V  
952 Homologs in Tip Growth and Septation in *Aspergillus nidulans*. *PLoS ONE* 7: e31218
- 953 Tilburn J, Scazzocchio C, Taylor GG, Zabicky-Zissman JH, Lockington RA, Davies RW  
954 (1983) Transformation by integration in *Aspergillus nidulans*. *Gene* 26: 205-211
- 955 Todd RB, Davis MA, Hynes MJ (2007) Genetic manipulation of *Aspergillus nidulans* :  
956 meiotic progeny for genetic analysis and strain construction. *Nat Protoc* 2: 811-821
- 957 Wang Z, Edwards JG, Riley N, Provance DW, Karcher R, Li X-d, Davison IG, Ikebe M,  
958 Mercer JA, Kauer JA, Ehlers MD (2008) Myosin Vb Mobilizes Recycling Endosomes  
959 and AMPA Receptors for Postsynaptic Plasticity. *Cell* 135: 535-548
- 960 Wei Z, Liu X, Yu C, Zhang M (2013) Structural basis of cargo recognitions for class V  
961 myosins. *Proc Natl Acad Sci USA* 110: 11314-9
- 962 Wong S, Hepowitz NL, Port SA, Yau RG, Peng Y, Azad N, Habib A, Harpaz N,  
963 Schuldiner M, Hughson FM, MacGurn JA, Weisman LS (2020) Cargo Release from  
964 Myosin V Requires the Convergence of Parallel Pathways that Phosphorylate and  
965 Ubiquitylate the Cargo Adaptor. *Curr Biol* 30: 4399-4412.e7
- 966 Wong S, Weisman LS (2021) Roles and regulation of myosin V interaction with cargo.  
967 *Adv Biol Regul*: 100787
- 968 Wu S-Z, Bezanilla M (2018) Actin and microtubule cross talk mediates persistent  
969 polarized growth. *J Cell Biol* 217: 3531-3544
- 970 Wu XS, Rao K, Zhang H, Wang F, Sellers JR, Matesic LE, Copeland NG, Jenkins NA,  
971 Hammer JA, 3rd (2002) Identification of an organelle receptor for myosin-Va. *Nat Cell*  
972 *Biol* 4: 271-8
- 973 Wu XS, Tsan GL, Hammer JA, III (2005) Melanophilin and myosin Va track the  
974 microtubule plus end on EB1. *J Cell Biol* 171: 201-207
- 975 Yao X, Wang X, Xiang X (2014) FHIP and FTS proteins are critical for dynein-mediated  
976 transport of early endosomes in *Aspergillus*. *Mol Biol Cell* 25: 2181-2189
- 977 Zhang J, Qiu R, Arst HN, Jr., Peñalva MA, Xiang X (2014) HookA is a novel dynein-  
978 early endosome linker critical for cargo movement in vivo. *J Cell Biol* 204: 1009-26
- 979 Zhang J, Tan K, Wu X, Chen G, Sun J, Reck-Peterson SL, Hammer JA, 3rd, Xiang X  
980 (2011) *Aspergillus* Myosin-v supports polarized growth in the absence of microtubule-  
981 based transport. *PLoS ONE* 6: e28575
- 982 Zheng P, Nguyen TA, Wong JY, Lee M, Nguyen TA, Fan JS, Yang D, Jedd G (2020)  
983 Spitzenkorper assembly mechanisms reveal conserved features of fungal and  
984 metazoan polarity scaffolds. *Nat Commun* 11: 2830  
985

986

## 987 **Legends to Figures**

### 988 **Figure 1. SVs can be delivered to the vesicle supply center by myosin-5 in the** 989 **absence of Sec4: myosin-5 is a RAB11 effector.**

990 (A) Schemes depict the cooperation of kinesin-1 and myosin-5 to deliver RAB11 SVs to  
991 the SPK and the situation in a myosin-5-less mutant in which SVs distribute across the  
992 apical dome because they cannot be focused at the SPK due to the absence of F-actin-  
993 dependent transport.

994 (B) Localization of GFP-RAB11 in the wild-type and in a *myoE*Δ mutant lacking myosin-  
995 5, displayed with the same contrast adjustments. On the right image the magnified  
996 *myoE*Δ tip on the left has been contrasted to reveal better the localization of RAB11 SVs  
997 in this mutant.

998 (C) Localization of GFP-RAB11 in the wild-type and in a *sec4*Δ tip shown at equivalent  
999 contrast.

1000 (D) Localization of MyoE-GFP in the wild-type and in a *sec4*Δ tip shown at equivalent  
1001 contrast.

1002 (E) Localization of GFP-GTD expressed under the control of the sucrose-inducible *inuA*  
1003 promoter (Hernández-González et al., 2018b) from a single copy transgene integrated  
1004 at the *inuA* locus. The construct lacks the motor domains, the IQ repeats and most of the  
1005 coiled-coil regions of MyoE (scheme on the top). Wild-type and *sec4*Δ cells contain intact  
1006 the resident copy of *myoE*, whereas the *myoE*Δ cell does not, as indicated with crosses  
1007 at the scheme at the bottom.

1008 (F) Localization of residues Y1414 and K1472 on opposite surfaces of the GTD (left) and  
1009 growth tests (bottom) revealing that *myoE*<sup>Y1414R</sup>, but not *myoE*<sup>R1472E</sup>, shows a nearly lethal  
1010 negative synthetic interaction with *sec4*Δ. *myoE* missense mutant strains were  
1011 constructed by gene replacement.

1012 (G) GST pull-down experiments with indicated RABs as baits, loaded with GDP or  
1013 GTPγS. The prey was MyoE (myosin-5) expressed in a TNT® coupled transcription-  
1014 translation reaction. Material pulled-down by the beads was analyzed by western blotting  
1015 using anti-MyoE antiserum. The bottom row shows a Coomassie-stained gel of GST-  
1016 RABs used in these pull-down assays.

1017

1018 **Figure 2: UDS1, a novel, direct effector of RAB11**

1019 (A) Table: Proteins retained by GTP $\gamma$ S- and GDP-loaded RAB11-GST columns were  
1020 analyzed in a QExactive mass spectrometer. The table lists the spectral counts obtained  
1021 for each indicated protein and condition, as well as the relative enrichment detected in  
1022 one sample vs. the other. Note that markedly abundant GdiA (GDP dissociation factor)  
1023 interacts preferentially with GDP-RAB11. AP-2 $\alpha$  was used as negative control. Bottom,  
1024 GST-pull down assays with the indicated baits, using a prey extract of *A. nidulans*  
1025 expressing UDS1-HA3 from the endogenously tagged gene. Pull-downs were analyzed  
1026 by western blot with  $\alpha$ -HA3 antibody. GST-GFP was used as a further negative control.  
1027 (B) Features of UDS1. The probability of forming coiled-coils (red graph) and disordered  
1028 regions (grey area) is shown. The positions of the UDS1 and SCOP superfamily domains  
1029 are indicated.  
1030 (C) UDS1 is a dimer *in vitro*. Equilibrium ultracentrifugation of bacterially expressed and  
1031 purified UDS1 at a concentration of 4  $\mu$ M; Top: The concentration gradient obtained  
1032 (empty circles) is shown together with the best-fit analysis assuming that the protein is a  
1033 dimer. Bottom plot, differences between experimental data and estimated values for the  
1034 dimer model (residuals).  
1035 (D) Negative-stain electron microscopy of purified UDS1. The proteins were stained with  
1036 uranyl acetate and examined in a JEOL-1230 electron microscope. Four examples  
1037 selected showed the extended screw-like form of UDS1. The lengths of  $N=71$  molecules  
1038 were measured (plot; average 496  $\text{\AA}$  +/- 73 S.D.).  
1039 (E) GST-pull down assays using the indicated RABs and purified UDS1-His as prey.  
1040 UDS1 was detected by anti-His western blotting.  
1041

1042 **Figure 3. Subcellular localization of UDS1**

1043 (A) Representative images of a hyphal tip cell co-expressing mCh-RAB11 and MyoE-  
1044 GFP. Images are MIPs of deconvolved Z-stacks. All images in this Figure are shown at  
1045 the same magnification.  
1046 (B) Images of a hyphal tip cell co-expressing mCh-RAB11 and endogenously tagged  
1047 UDS1-GFP. Images are MIPs of deconvolved Z-stacks.  
1048 (C) Left, images of a hyphal tip cell co-expressing endogenously tagged MyoE-GFP and  
1049 UDS1-tdT. Images are MIPs of deconvolved Z-stacks. Right, MyoE-GFP and UDS1-tdT  
1050 strictly colocalize across time: A 4D movie made with MIPs of Z-stacks acquired every  
1051 30 sec (Supplemental movie 3) was used to draw a kymograph across the long axis of

1052 a hypha growing at 0.9  $\mu\text{m}/\text{min}$ . The diagonal lines traced by apical spots of the  
1053 fluorescent proteins reflect the hypha growing by apical extension.

1054 (D) UDS1-GFP strictly colocalizes with mCh-RAB11 SVs transported by MTs to the  
1055 apical dome in a cell lacking MyoE/myosin-5 (see also Figure 7A). Images are MIPs of  
1056 deconvolved Z-stacks.

#### 1057 **Figure 4. Characterization of HMSV, a myosin-5 interactor**

1058 (A) Cell extracts expressing the indicated GFP-tagged baits were immunoprecipitated  
1059 with GFP-Trap and the proteins associated with them were analyzed by LC-MS/MS. The  
1060 table lists the spectral counts obtained for each of the indicated co-precipitating proteins.  
1061 The GFP-tagged unrelated protein Uso1 (the homologue of mammalian p115) was used  
1062 as negative control.

1063 (B) Probability of forming coiled-coils (red graph) and disordered regions (grey area)  
1064 along the primary sequence of HMSV.

1065 (C) Endogenously tagged MyoE-mCh and HMSV-GFP strictly colocalize. Left, green and  
1066 red channel images are MIPs of deconvolved Z-stacks. Right, kymograph derived from  
1067 Supplemental Movie 5, which is a 4D series constructed with MIPs of Z-stacks acquired  
1068 with a beam splitter every 15 sec for a total of 15 min. The hypha was growing at 0.62  
1069  $\mu\text{m}/\text{min}$ .

1070 (D) Growth tests at 37°C of strains with indicated genotypes, which were point-inoculated  
1071 on complete medium.

1072 (E) Visual comparison of the different cell widths of the indicated mutant hyphae.

1073 (F) MyoE and HMSV interact directly: MyoE and HMSV-HA3 obtained from separate  
1074 TNT reactions were combined with Protein A beads preloaded with polyclonal IgGs  
1075 against MyoE or, as negative control, against the unrelated protein Uso1.  
1076 Immunoprecipitates were analyzed by western blotting with  $\alpha$ -HA antibody. Equal IgG  
1077 load for the two IP reactions was confirmed by Coomassie staining of IgG's heavy chains.

1078 (G) HMSV is not a (direct) RAB11 effector: GST-pull down assays with GDP and GTP $\gamma$ S  
1079 RAB11 baits, using prey cell extracts of *A. nidulans* expressing HMSV-HA3 (left) or, as  
1080 positive control, UDS1-HA3 from endogenously tagged genes. Pull-downs were  
1081 analyzed by western blot with  $\alpha$ -HA3 antibody. Note that no signal of HMSV is detected  
1082 under conditions in which the UDS1 signal is strong. However, after strong overexposure  
1083 a faint band of HMSV is detectable in the GTP $\gamma$ S reaction.

1084

1085 **Figure 5. HMSV is a direct interactor of UDS1 and an indirect effector of RAB11**

1086 (A) HMSV and UDS1 interact directly: Pull-down assays with GST-UDS1 as bait and  
1087 HMSV-HA3 or, as negative control, Uso1-HA3 as preys. Preys were obtained by TNT  
1088 expression. Pull-downs were analyzed by  $\alpha$ -HA3 western blotting.

1089 (B) UDS1 bridges the interaction of HMSV with the active form of RAB11. GST pull-down  
1090 assays with RAB11 and, as negative control, RAB5b baits. The preys, combined in the  
1091 reactions as indicated, were purified UDS1-His and TNT-synthesized HMSV-HA3.  
1092 Samples of the reactions were analyzed by  $\alpha$ -His and  $\alpha$ -HA western blotting. HMSV is  
1093 recruited to RAB11 only when UDS1 is present and only if the GTPase is in the active  
1094 conformation.

1095

1096 **Figure 6. In cells, UDS1 and MyoE/myosin-5 are present in a complex scaffolded**  
1097 **by HMSV**

1098 (A) Myosin-5/MyoE associates with UDS1 and HMSV but not with Uso1. Extracts of cells  
1099 expressing indicated endogenously-tagged GFP proteins were immunoprecipitated with  
1100 GFP-Trap nanobody. Left, western blot analysis of immunoprecipitates with  $\alpha$ -MyoE  
1101 antibody. The band indicated with an asterisk is unspecific. Right top, silver staining of  
1102 immunoprecipitates. MyoE is remarkably abundant in the HMSV sample, detectable in  
1103 the UDS1 sample and absent in the Uso1 sample. Right bottom, relative levels of the  
1104 preys revealed by  $\alpha$ -GFP western blotting.

1105 (B) UDS1 and MyoE/myosin-5 associate only if HMSV is present.

1106 (C) HMSV and MyoE/myosin-5 associate efficiently when UDS1 is absent

1107 (D) UDS1 associates with HMSV regardless of whether MyoE is absent or present. GFP-  
1108 Trap immunoprecipitates of cells co-expressing HMSV-HA3 were analyzed by  $\alpha$ -HA3  
1109 western blotting to detect HMSV, and by  $\alpha$ -GFP western blotting to reveal the relative  
1110 levels of the baits.

1111

1112 **Figure 7. Localization of myosin-5 and of RAB11 and its associates in different**  
1113 **genetic backgrounds supports the role of the tripartite complex as myosin-5**  
1114 **adaptor**

1115 (A) Localization of the components of the tripartite complex in the different genetic  
1116 backgrounds. Images are shown at the same magnification. All GFP reporters were  
1117 endogenously tagged, implying that the corresponding null background images are  
1118 empty. Images are MIPs of deconvolved Z-stacks.



1119 (B) Quantitation of the MyoE-GFP signal in the SPK of *uds1* $\Delta$  and *hmsV* $\Delta$  cells compared  
1120 to the wt. Mean values for the left graph were: wild-type 2842 A.U.  $\pm$  227 S.D. vs. *uds1* $\Delta$   
1121 558  $\pm$  159 S.D.,  $P < 0.0001$  in unpaired  $t$ -test. For the right graph (corresponding to a  
1122 different experiment), wild-type, 3496  $\pm$  245 S.D. vs. 654  $\pm$  149 in the *hmvS* $\Delta$  mutant ( $P$   
1123  $< 0.0001$  in unpaired  $t$ -test).

1124 **Figure 8. A cargo of the RAB11 recycling pathway is delocalized from the SPK in**  
1125 ***uds1* $\Delta$  and *hmsV* $\Delta$  cells**

1126 The scheme depicts the endocytic recycling pathway followed by the chitin-synthase  
1127 ChsB. *uds1* $\Delta$  and *hmsV* $\Delta$  mutations delocalize ChsB from the SPK, correlating with  
1128 delocalization of RAB11 from the SPK to an apical crescent. Red arrowheads indicate  
1129 the SPKs.

1130 **Figure 9. A model for the engagement of myosin-5 by RAB11 SVs in *A. nidulans*.**

1131 In the wild-type RAB11 is recruited to SVs during the Golgi-to-post-Golgi transition.  
1132 RAB11 interacts with the GTD of MyoE and with the UDS1 dimer. UDS1 in turn connects  
1133 active RAB11 to the HMSV scaffold (represented here as a monomer, but potentially  
1134 being a dimer). HMSV bridges RAB11/UDS1 to the MyoE myosin-5. In the presence of  
1135 the whole complex myosin-5 transport is most efficient (large arrow). In the absence of  
1136 UDS1 or HMSV there is still myosin-5 transport due to the direct interaction between  
1137 RAB11 and the MyoE GTD, albeit this transport is markedly less efficient (small arrows),  
1138 such that the accumulation of SVs in the SPK is impaired and MT-dependent transport  
1139 becomes more prominent, leading to the characteristic apical dome distribution of SVs  
1140 in these mutants (Figure 7A). Phenotypically the *hmsV* $\Delta$  *uds1* $\Delta$  double mutant is  
1141 indistinguishable from either of the single mutant strains (Figure S2). HMSV and UDS1  
1142 might sustain efficient myosin-5 transport by reinforcing the interaction between RAB11  
1143 and the motor or, alternatively, they might increase processivity of the motor or facilitate  
1144 the switch from MTs to actin cables in the crowded cytoplasm of the hyphal tip.

1145

1146

1147 **Legends to Movies**

1148 **Movie S1**

1149 GFP-tagged myosin-5 (MyoE) concentrates at the SPK/vesicle supply center of a *sec4Δ*  
1150 cell. The movie was built with 100 frames representing middle planes of the cell, acquired  
1151 (streaming to the RAM) at 2.5 fps (total 40 sec). Timestamp is in sec. msec.

1152 **Movie S2**

1153 GFP-GTD (inverted greyscale) arriving at the apical dome of a *myoEΔ* cells by way of  
1154 MT-dependent transport, implying that the myosin-5 GTD is sufficient to bind SVs. The  
1155 movie was built with 300 frames representing middle planes of the cell, acquired  
1156 (streaming to the RAM) at 5 fps (total 1 min). Timestamp is in sec. msec.

1157 **Movie S3**

1158 Co-filming of mCh-RAB11 and UDS1-GFP over a 25 min period. This movie was made  
1159 with the simultaneously acquired (using a Gemini beam splitter) red and green channel  
1160 images (shown in inverted greyscale) of a hypha co-expressing both proteins at  
1161 physiological levels. Built with 101 frames acquired every 15 sec (0.066 fps). Timestamp  
1162 in min. sec.

1163 **Movie S4**

1164 UDS1-tdT and MyoE-GFP strictly colocalize over time at the SPK. Z-stacks of the  
1165 corresponding channels (MIPs shown in inverted greyscale) were acquired every 30 sec  
1166 (0.033 fps) for a total of 38 frames (18.5 min). Timestamp is in min. sec.

1167 **Movie S5**

1168 UDS1-GFP arriving at the apical dome in a *myoEΔ* cell. Note the recurring dots localizing  
1169 to the plasma membrane, in all likelihood representing SVs containing UDS1 that are  
1170 being delivered to the dome by MT transport. The movie was made with middle planes  
1171 streamed to the RAM of the computer every 400 msec (2.5 fps). Timestamp is in sec.  
1172 msec.

1173 **Movie S6**

1174 mCh-MyoE and HMSV-GFP strictly colocalize over time at the SPK. Z-stacks in the  
1175 green and red channels were simultaneously acquired with a DualViewer every 15 sec

1176 (0.066 fps) for 15 min. The movie was built with the corresponding MIPs (shown in  
1177 inverted greyscale). Timestamp is in min.sec.

1178 **Movie S7**

1179 A wild-type and an *hmsV* $\Delta$  cell expressing MyoE-GFP are shown alongside using  
1180 equivalent contrast to underline the reduced levels of MyoE at the mutant's SPK. Some  
1181 moving vesicles are visible in the background. The movies were built with 100 middle  
1182 planes acquired with the same settings and streamed to the computer's RAM every 100  
1183 msec (10 fps) for a total of 10 sec. Timestamp is in sec. msec.

1184 **Movie S8**

1185 One hundred middle planes of a *myoE* $\Delta$  cell expressing HMSV-GFP were streamed to  
1186 the computer's RAM every 400 msec (2.5 fps) for a total of 40 sec. Note that HMSV  
1187 distributes like SVs arriving to the dome by MT transport. Time scale is in sec. msec.

1188  
1189

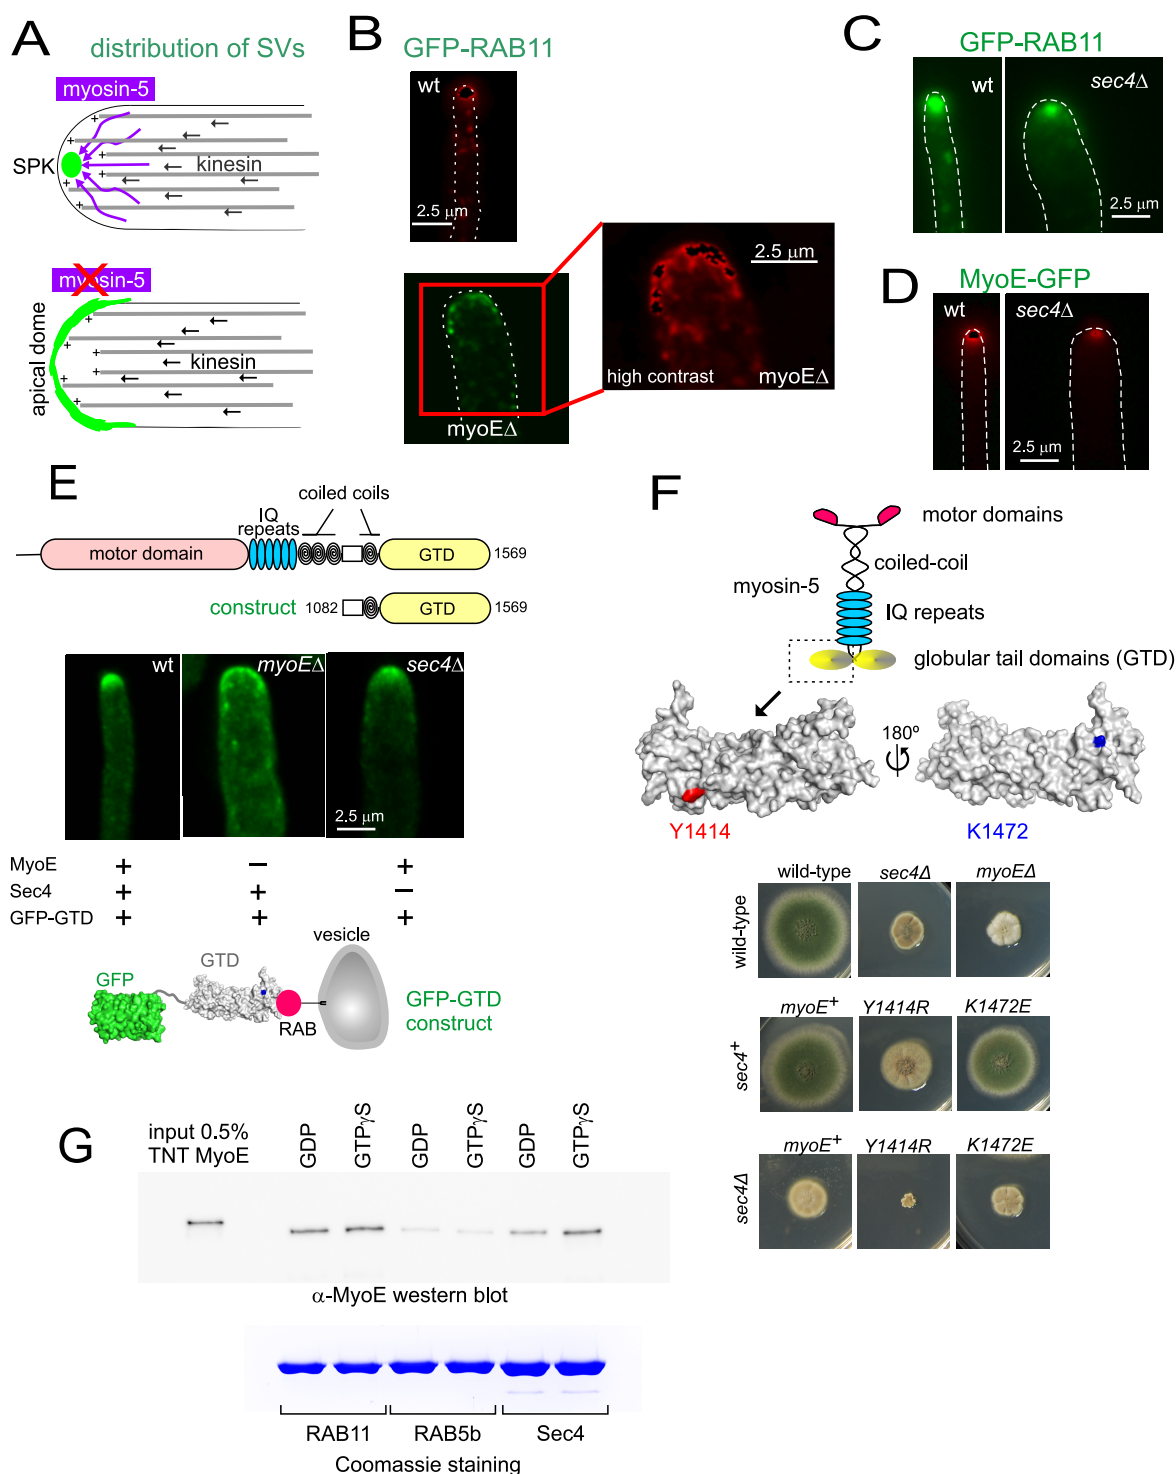

**Figure 1. SVs can be delivered to the vesicle supply center by myosin-5 in the absence of Sec4: myosin-5 is a RAB11 effector.** (A) Schemes depict the cooperation of kinesin-1 and myosin-5 to deliver RAB11 SVs to the SPK and the situation in a myosin-5-less mutant in which SVs distribute across the apical dome because they cannot be focused at the SPK due to the absence of F-actin-dependent transport.

(B) Localization of GFP-RAB11 in the wild-type and in a *myoEΔ* mutant lacking myosin-5, displayed with the same contrast adjustments. On the right image the magnified *myoEΔ* tip on the left has been contrasted to reveal better the localization of RAB11 SVs in this mutant.

(C) Localization of GFP-RAB11 in the wild-type and in a *sec4Δ* tip shown at equivalent contrast.

(D) Localization of MyoE-GFP in the wild-type and in a *sec4Δ* tip shown at equivalent contrast.

(E) Localization of GFP-GTD expressed under the control of the sucrose-inducible *inuA* promoter (Hernández-González et al., 2018b) from a single copy transgene integrated at the *inuA* locus. The construct lacks the motor domains, the IQ repeats and most of the coiled-coil regions of MyoE (scheme on the top). Wild-type and *sec4Δ* cells contain intact the resident copy of *myoE*, whereas the *myoEΔ* cell does not, as indicated with crosses at the scheme at the bottom.

(F) Localization of residues Y1414 and K1472 on opposite surfaces of the GTD (left) and growth tests (bottom) revealing that *myoE*<sup>Y1414R</sup>, but not *myoE*<sup>K1472E</sup>, shows a nearly lethal negative synthetic interaction with *sec4Δ*. *myoE* missense mutant strains were constructed by gene replacement.

(G) GST pull-down experiments with indicated RABs as baits, loaded with GDP or GTPS. The prey was MyoE (myosin-5) expressed in a TNT coupled transcription-translation reaction. Material pulled-down by the beads was analyzed by western blotting using anti-MyoE antiserum. The bottom row shows a Coomassie-stained gel of GST-RABs used in these pull-down assays.

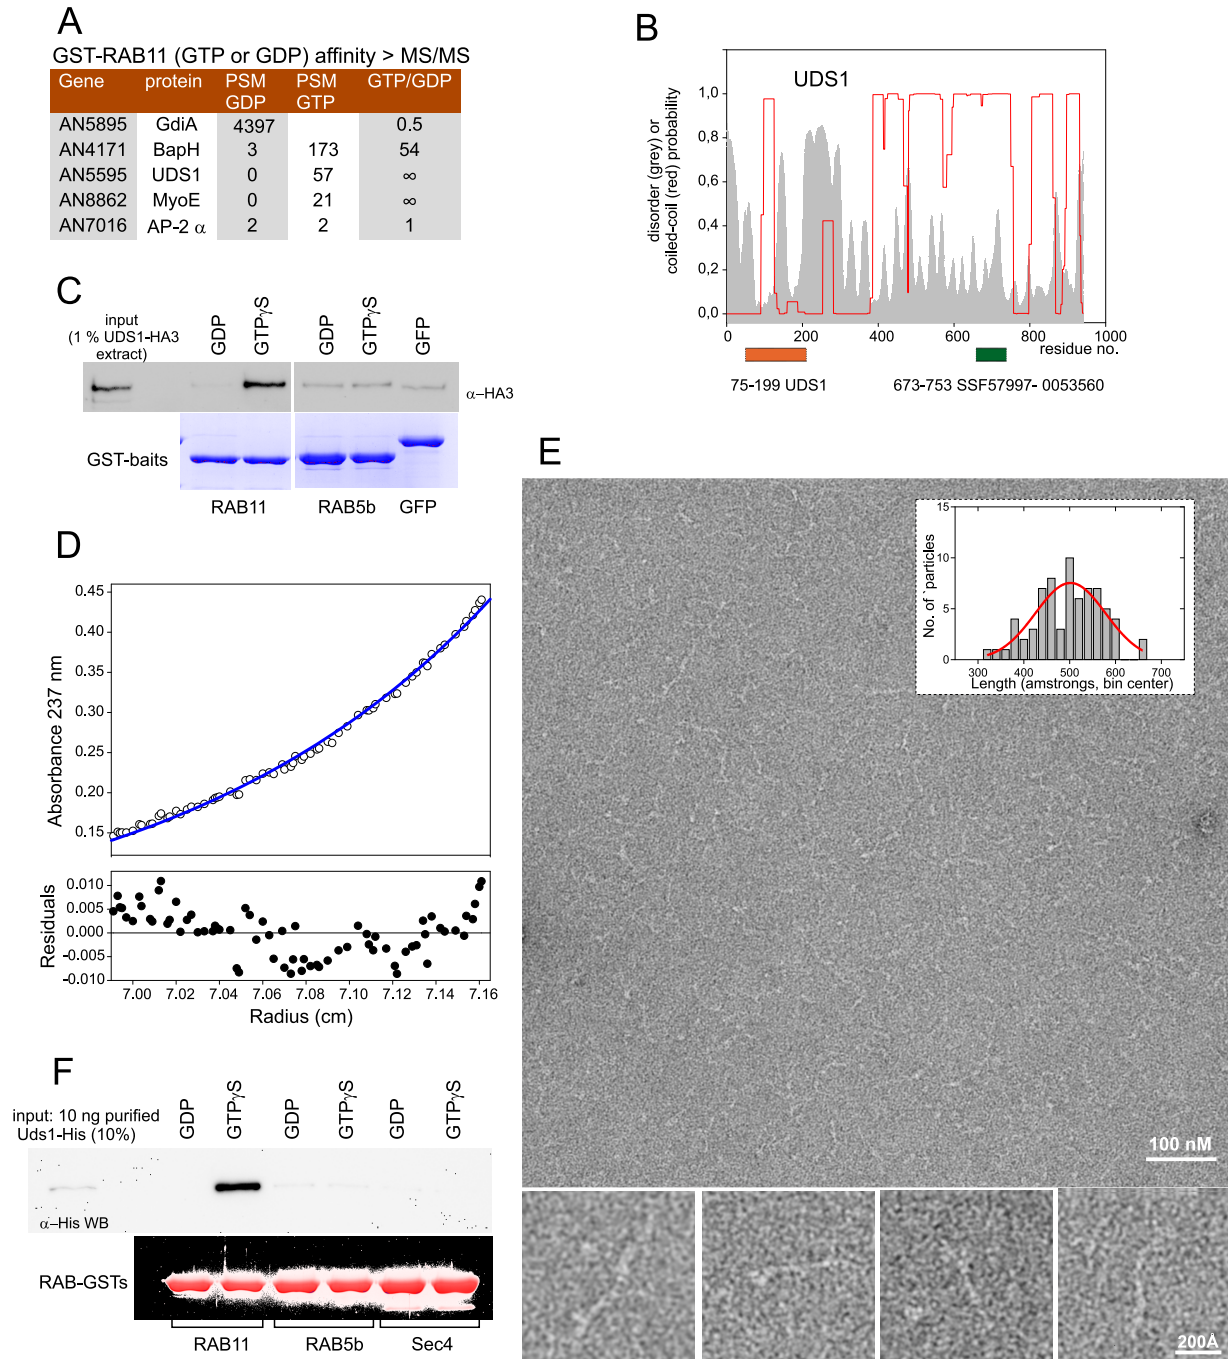

**Figure 2: UDS1, a novel, direct effector of RAB11**

(A) Table: Proteins retained by GTP $\gamma$ S- and GDP-loaded RAB11-GST columns were analyzed in a QExactive mass spectrometer. The table lists the spectral counts obtained for each indicated protein and condition, as well as the relative enrichment detected in one sample vs. the other. Note that markedly abundant GdiA (GDP dissociation factor) interacts preferentially with GDP-RAB11. AP-2 $\alpha$  was used as negative control. Bottom, GST-pull down assays with the indicated baits, using a prey extract of *A. nidulans* expressing UDS1-HA3 from the endogenously tagged gene. Pull-downs were analyzed by western blot with  $\alpha$ -HA3 antibody. GST-GFP was used as a further negative control.

(B) Features of UDS1. The probability of forming coiled-coils (red graph) and disordered regions (grey area) is shown. The positions of the UDS1 and SCOP superfamily domains are indicated.

(C) UDS1 is a dimer *in vitro*. Equilibrium ultracentrifugation of bacterially expressed and purified UDS1 at a concentration of 4  $\mu$ M; Top: The concentration gradient obtained (empty circles) is shown together with the best-fit analysis assuming that the protein is a dimer. Bottom plot, differences between experimental data and estimated values for the dimer model (residuals).

(D) Negative-stain electron microscopy of purified UDS1. The proteins were stained with uranyl acetate and examined in a JEOL-1230 electron microscope. Four examples selected showed the extended screw-like form of UDS1. The lengths of  $N=71$  molecules were measured (plot; average 496  $\text{\AA}$   $\pm$  73 S.D.).

(E) GST-pull down assays using the indicated RABs and purified UDS1-His as prey. UDS1 was detected by anti-His western blotting.

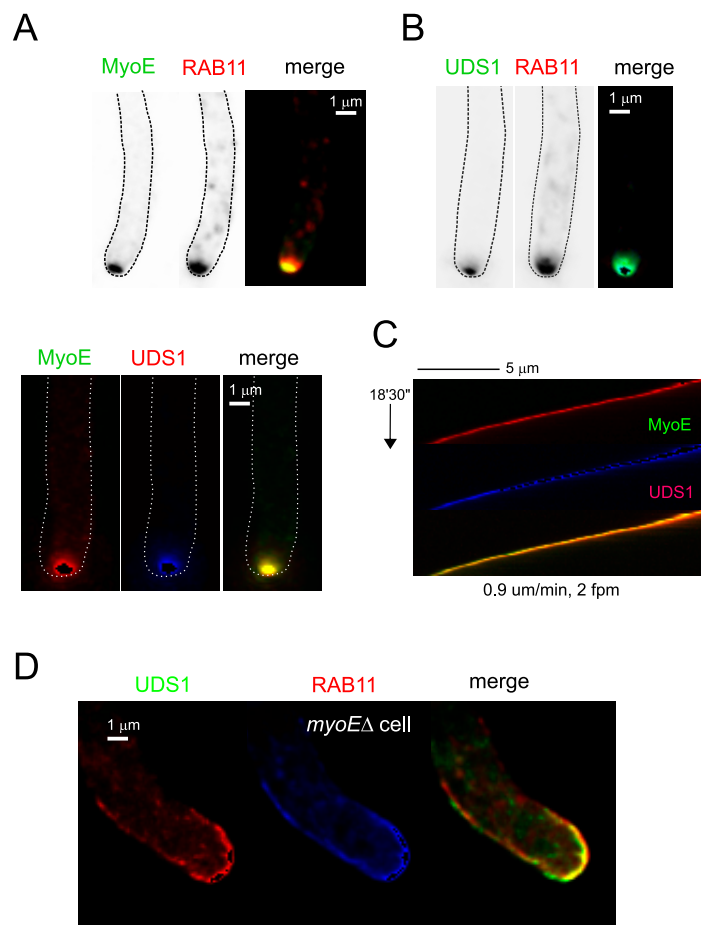

**Figure 3. Subcellular localization of UDS1**

(A) Representative images of a hyphal tip cell co-expressing mCh-RAB11 and MyoE-GFP. Images are MIPs of deconvolved Z-stacks. All images in this Figure are shown at the same magnification.

(B) Images of a hyphal tip cell co-expressing mCh-RAB11 and endogenously tagged UDS1-GFP. Images are MIPs of deconvolved Z-stacks.

(C) Left, images of a hyphal tip cell co-expressing endogenously tagged MyoE-GFP and UDS1-tdT. Images are MIPs of deconvolved Z-stacks. Right, MyoE-GFP and UDS1-tdT strictly colocalize across time: A 4D movie made with MIPs of Z-stacks acquired every 30 sec (Supplemental movie 3) was used to draw a kymograph across the long axis of a hypha growing at 0.9 μm/min. The diagonal lines traced by apical spots of the fluorescent proteins reflect the hypha growing by apical extension.

(D) UDS1-GFP strictly colocalizes with mCh-RAB11 SVs transported by MTs to the apical dome in a cell lacking MyoE/myosin-5 (see also Figure 7A). Images are MIPs of deconvolved Z-stacks

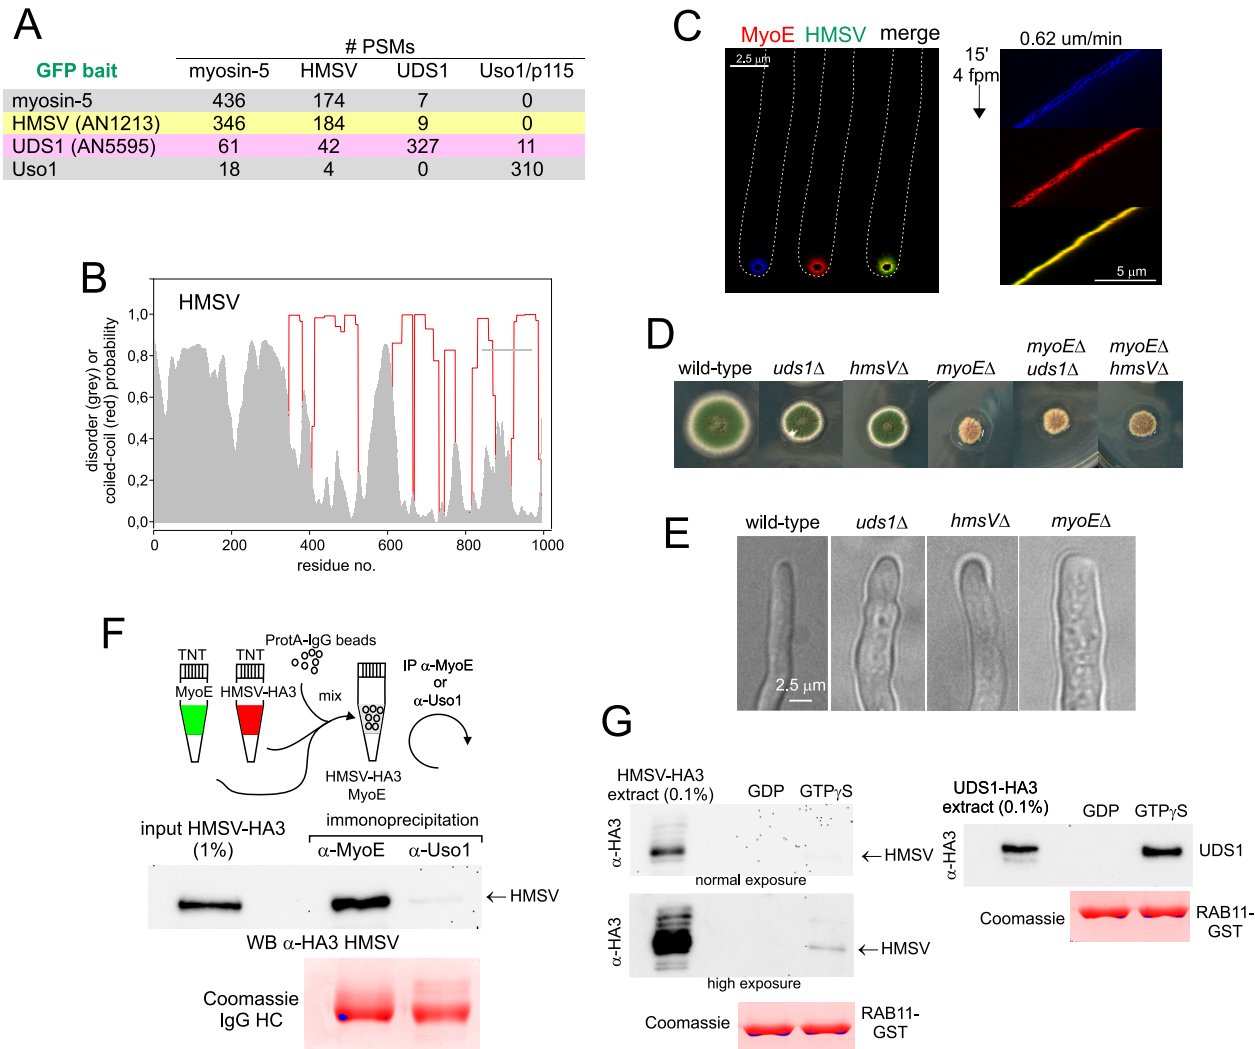

**Figure 4. Characterization of HMSV, a myosin-5 interactor**

(A) Cell extracts expressing the indicated GFP-tagged baits were immunoprecipitated with GFP-Trap and the proteins associated with them were analyzed by LC-MS/MS. The table lists the spectral counts obtained for each of the indicated co-precipitating proteins. The GFP-tagged unrelated protein Uso1 (the homologue of mammalian p115) was used as negative control.

(B) Probability of forming coiled-coils (red graph) and disordered regions (grey area) along the primary sequence of HMSV.

(C) Endogenously tagged MyoE-mCh and HMSV-GFP strictly colocalize. Left, green and red channel images are MIPs of deconvolved Z-stacks. Right, kymograph derived from Supplemental Movie 5, which is a 4D series constructed with MIPs of Z-stacks acquired with a beam splitter every 15 sec for a total of 15 min. The hypha was growing at 0.62  $\mu\text{m}/\text{min}$ .

(D) Growth tests at 37°C of strains with indicated genotypes, which were point-inoculated on complete medium.

(E) Visual comparison of the different cell widths of the indicated mutant hyphae.

(F) MyoE and HMSV interact directly: MyoE and HMSV-HA3 obtained from separate TNT reactions were combined with Protein A beads preloaded with polyclonal IgGs against MyoE or, as negative control, against the unrelated protein Uso1. Immunoprecipitates were analyzed by western blotting with  $\alpha$ -HA antibody. Equal IgG load for the two IP reactions was confirmed by Coomassie staining of IgG's heavy chains.

(G) HMSV is not a (direct) RAB11 effector: GST-pull down assays with GDP and GTP $\gamma$ S RAB11 baits, using prey cell extracts of *A. nidulans* expressing HMSV-HA3 (left) or, as positive control, UDS1-HA3 from endogenously tagged genes. Pull-downs were analyzed by western blot with  $\alpha$ -HA3 antibody. Note that no signal of HMSV is detected under conditions in which the UDS1 signal is strong. However, after strong overexposure a faint band of HMSV is detectable in the GTP $\gamma$ S reaction.

A

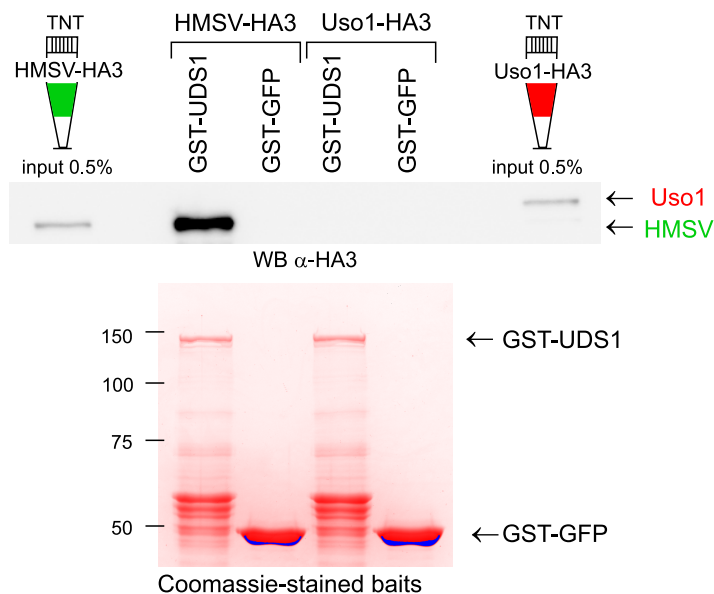

B

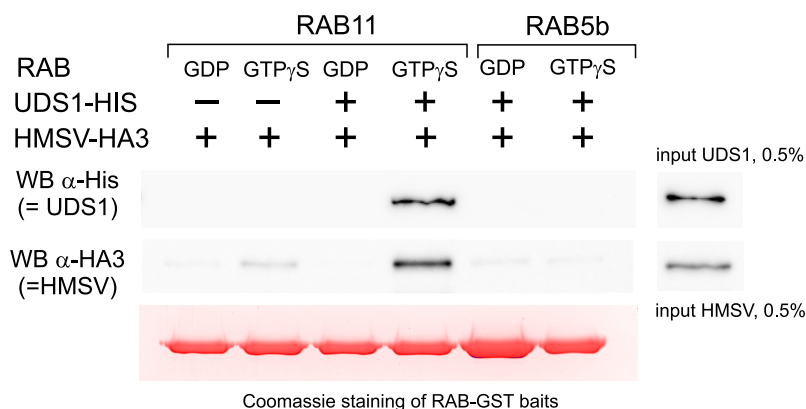

**Figure 5. HMSV is a direct interactor of UDS1 and an indirect effector of RAB11**

(A) HMSV and UDS1 interact directly: Pull-down assays with GST-UDS1 as bait and HMSV-HA3 or, as negative control, Uso1-HA3 as preys. Preys were obtained by TNT expression. Pull-downs were analyzed by  $\alpha$ -HA3 western blotting. (B) UDS1 bridges the interaction of HMSV with the active form of RAB11. GST pull-down assays with RAB11 and, as negative control, RAB5b baits. The preys, combined in the reactions as indicated, were purified UDS1-His and TNT-synthesized HMSV-HA3. Samples of the reactions were analyzed by  $\alpha$ -His and  $\alpha$ -HA western blotting. HMSV is recruited to RAB11 only when UDS1 is present and only if the GTPase is in the active conformation.



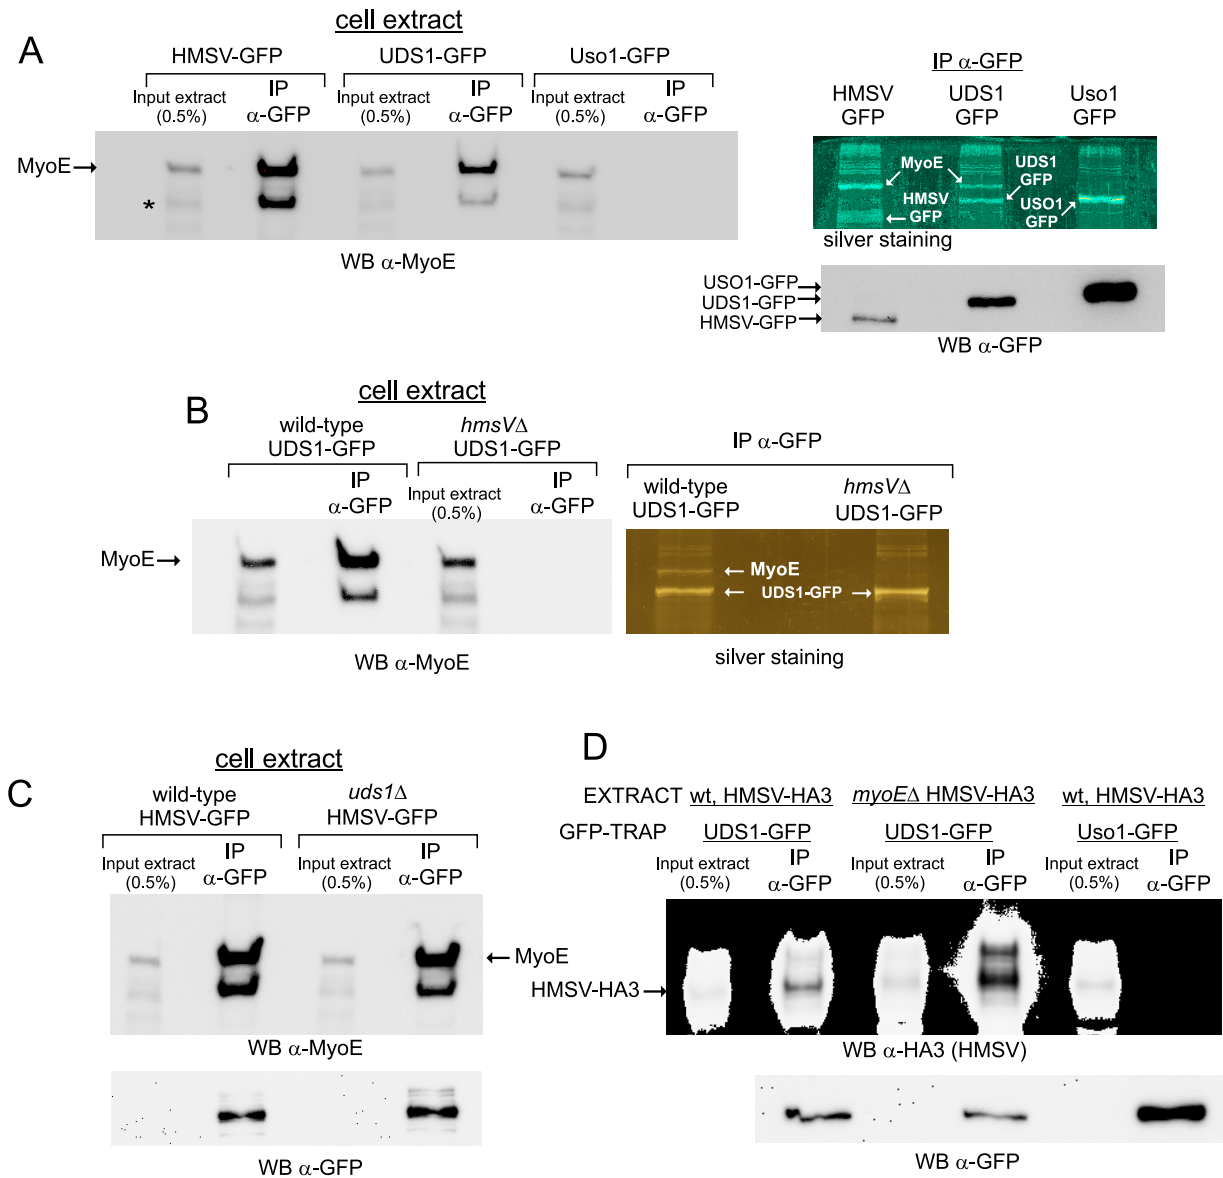

**Figure 6. In cells, UDS1 and MyoE/myosin-5 are present in a complex scaffolded by HMSV**

(A) Myosin-5/MyoE associates with UDS1 and HMSV but not with Uso1. Extracts of cells expressing indicated endogenously-tagged GFP proteins were immunoprecipitated with GFP-Trap nanobody. Left, western blot analysis of immunoprecipitates with  $\alpha$ -MyoE antibody. The band indicated with an asterisk is unspecific. Right top, silver staining of immunoprecipitates. MyoE is remarkably abundant in the HMSV sample, detectable in the UDS1 sample and absent in the Uso1 sample. Right bottom, relative levels of the preys revealed by  $\alpha$ -GFP western blotting.

(B) UDS1 and MyoE/myosin-5 associate only if HMSV is present.

(C) HMSV and MyoE/myosin-5 associate efficiently when UDS1 is absent

(D) UDS1 associates with HMSV regardless of whether MyoE is absent or present. GFP-Trap immunoprecipitates of cells co-expressing HMSV-HA3 were analyzed by  $\alpha$ -HA3 western blotting to detect HMSV, and by  $\alpha$ -GFP western blotting to reveal the relative levels of the baits.

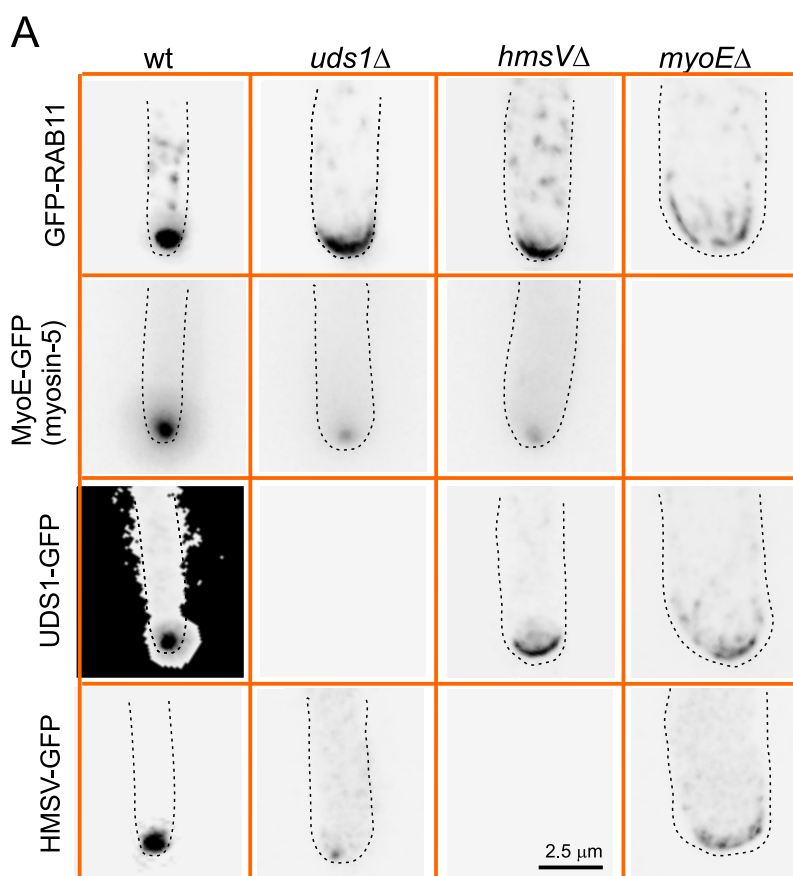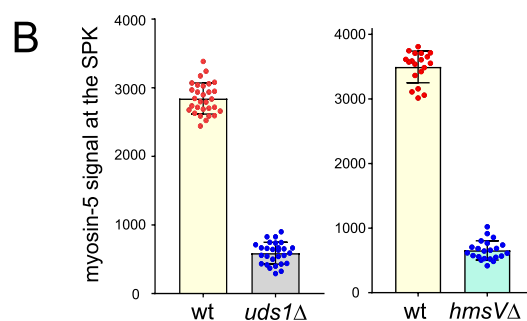

**Figure 7. Localization of myosin -5 and of RAB11 and its associates in different genetic backgrounds supports the role of the tripartite complex as myosin-5 adaptor**

(A) Localization of the components of the tripartite complex in the different genetic backgrounds. Images are shown at the same magnification. All GFP reporters were endogenously tagged, implying that the corresponding null background images are empty. Images are MIPs of deconvolved Z-stacks.

(B) Quantitation of the MyoE-GFP signal in the SPK of *uds1* $\Delta$  and *hmsV* $\Delta$  cells compared to the wt. Mean values for the left graph were: wild-type 2842 A.U.  $\pm$  227 S.D. vs. *uds1* $\Delta$  558  $\pm$  159 S.D.,  $P < 0.0001$  in unpaired *t*-test. For the right graph (corresponding to a different experiment), wild-type, 3496  $\pm$  245 S.D. vs. 654  $\pm$  149 in the *hmsV* $\Delta$  mutant ( $P < 0.0001$  in unpaired *t*-test).

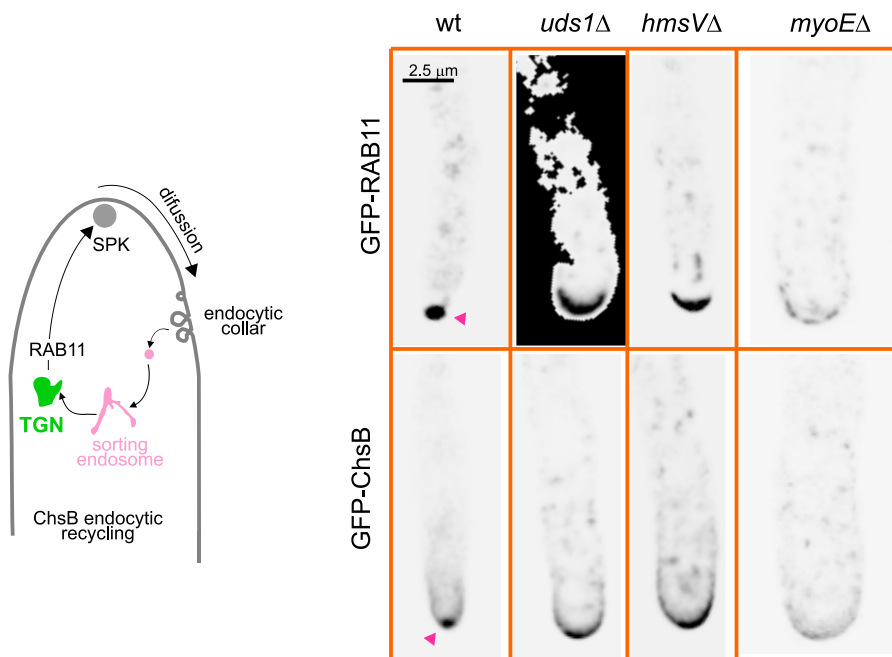

**Figure 8. A cargo of the RAB11 recycling pathway is delocalized from the SPK in *uds1Δ* and *hmsVΔ* cells**

The scheme depicts the endocytic recycling pathway followed by the chitin-synthase ChsB. *uds1Δ* and *hmsVΔ* mutations delocalize ChsB from the SPK, correlating with delocalization of RAB11 from the SPK to an apical crescent. Red arrowheads indicate the SPKs.

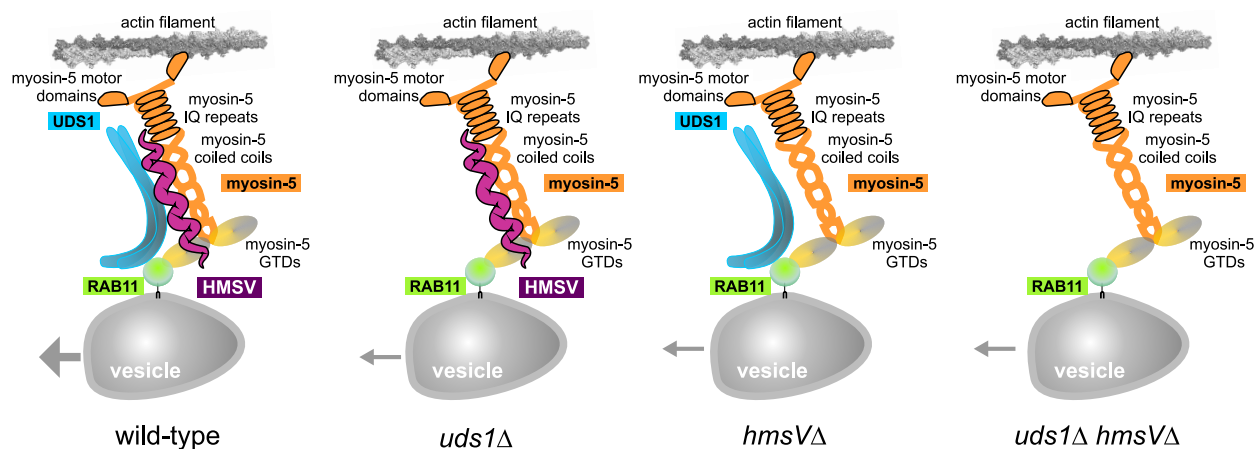

**Figure 9. A model for the engagement of myosin-5 by RAB11 SVs in *A. nidulans*.**

In the wild-type RAB11 is recruited to SVs during the Golgi-to-post-Golgi transition. RAB11 interacts with the GTD of MyoE and with the UDS1 dimer. UDS1 in turn connects active RAB11 to the HMSV scaffold (represented here as a monomer, but potentially being a dimer). HMSV bridges RAB11/UDS1 to the MyoE myosin-5. In the presence of the whole complex myosin-5 transport is most efficient (large arrow). In the absence of UDS1 or HMSV there is still myosin-5 transport due to the direct interaction between RAB11 and the MyoE GTD, albeit this transport is markedly less efficient (small arrows), such that the accumulation of SVs in the SPK is impaired and MT-dependent transport becomes more prominent, leading to the characteristic apical dome distribution of SVs in these mutants (Figure 7A). Phenotypically the *hmsV*Δ *uds1*Δ double mutant is indistinguishable from either of the single mutant strains (Figure S2). HMSV and UDS1 might sustain efficient myosin-5 transport by reinforcing the interaction between RAB11 and the motor or, alternatively, they might increase processivity of the motor or facilitate the switch from MTs to actin cables in the crowded cytoplasm of the hyphal tip.

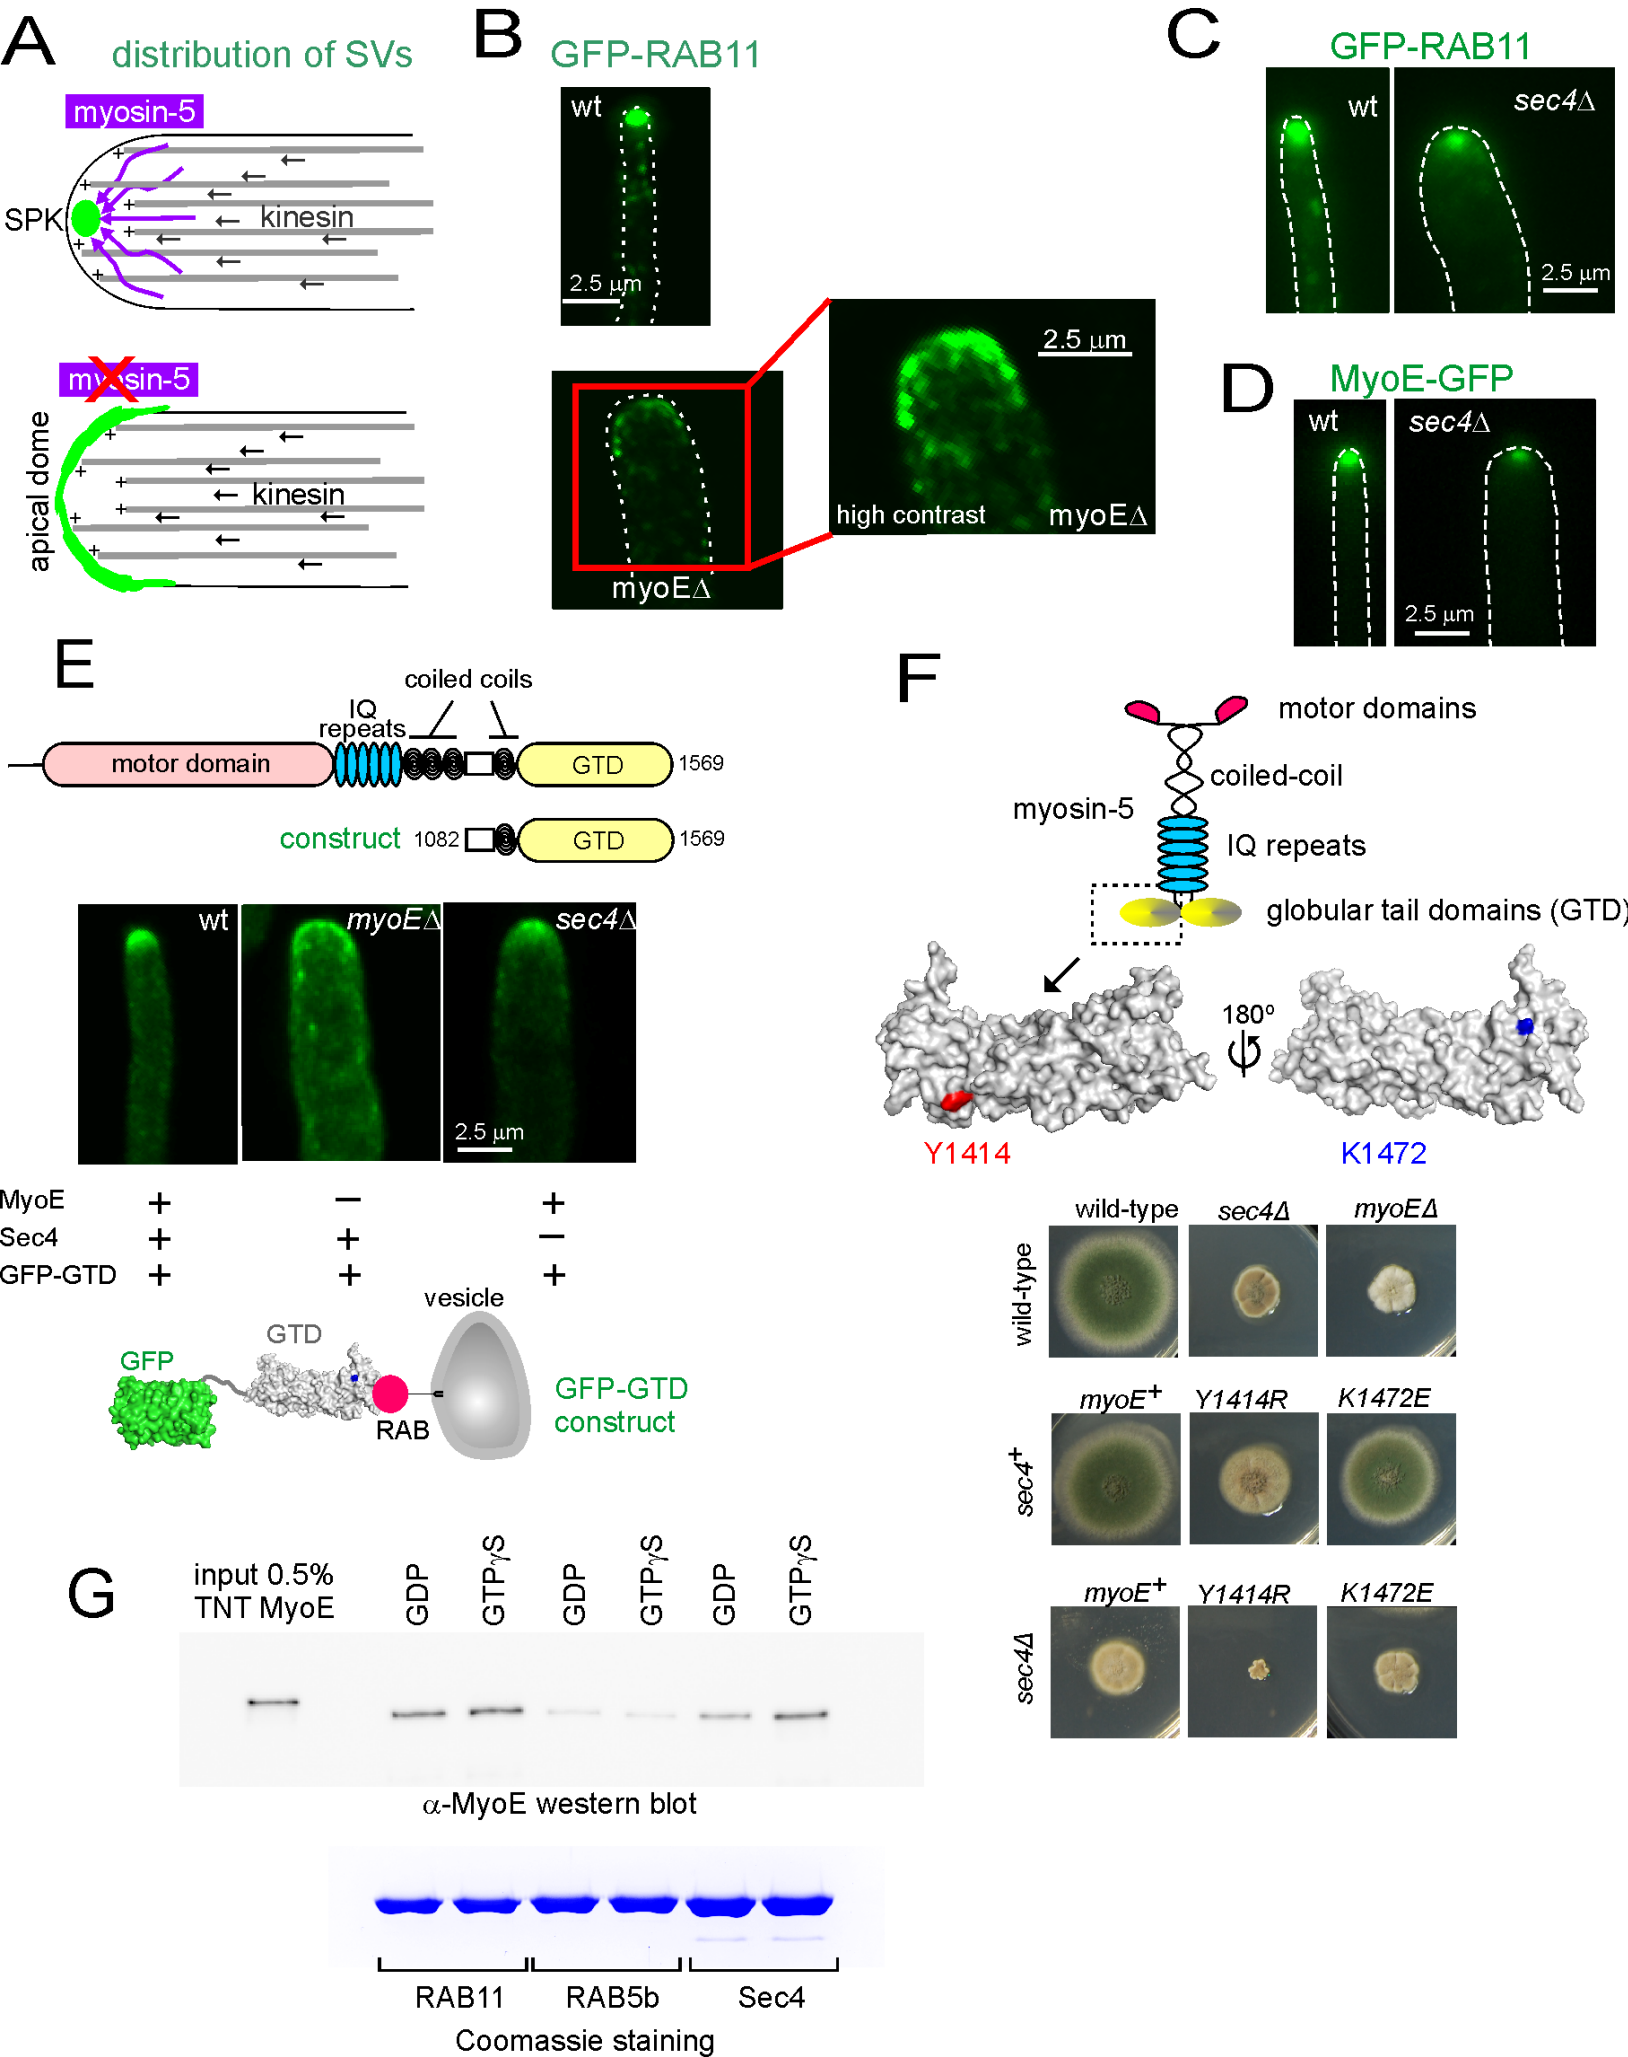

**A**

GST-RAB11 (GTP or GDP) affinity &gt; MS/MS

| Gene   | protein       | PSM<br>GDP | PSM<br>GTP | GTP/GDP |
|--------|---------------|------------|------------|---------|
| AN5895 | GdiA          | 4397       |            | 0.5     |
| AN4171 | BapH          | 3          | 173        | 54      |
| AN5595 | UDS1          | 0          | 57         | ∞       |
| AN8862 | MyoE          | 0          | 21         | ∞       |
| AN7016 | AP-2 $\alpha$ | 2          | 2          | 1       |

**C**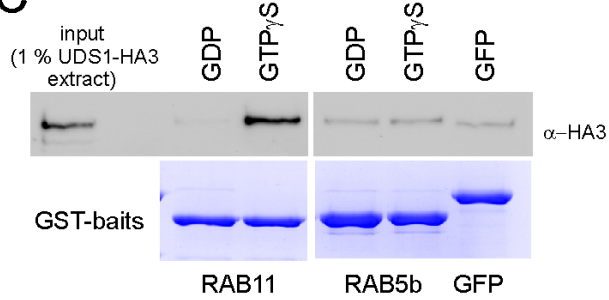**D**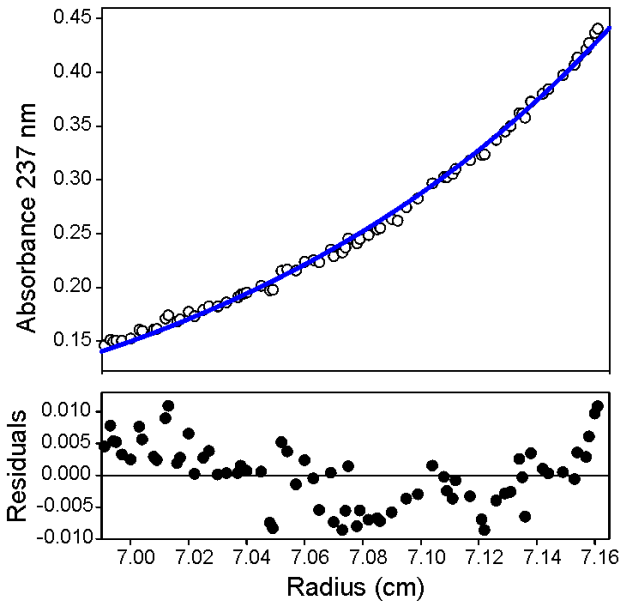**F**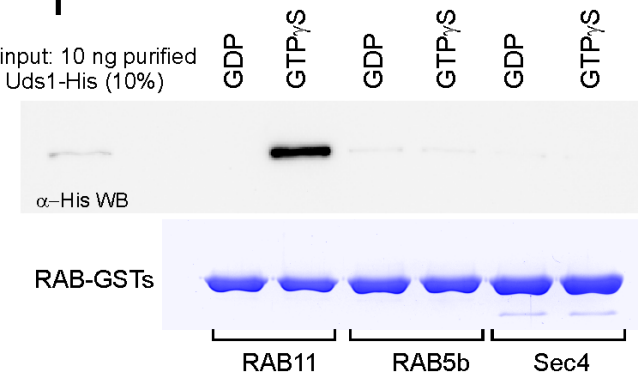**B**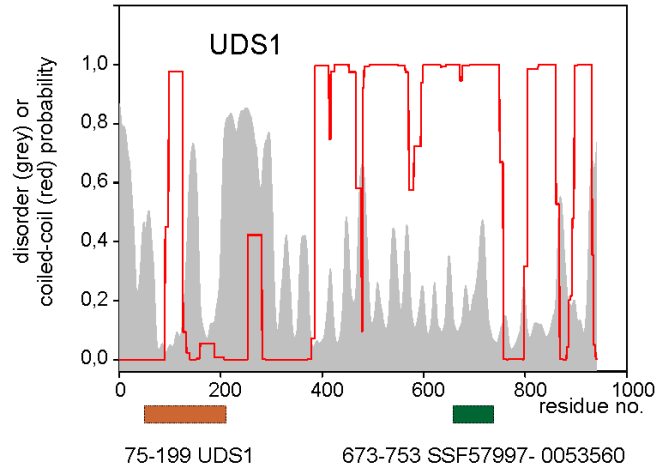**E**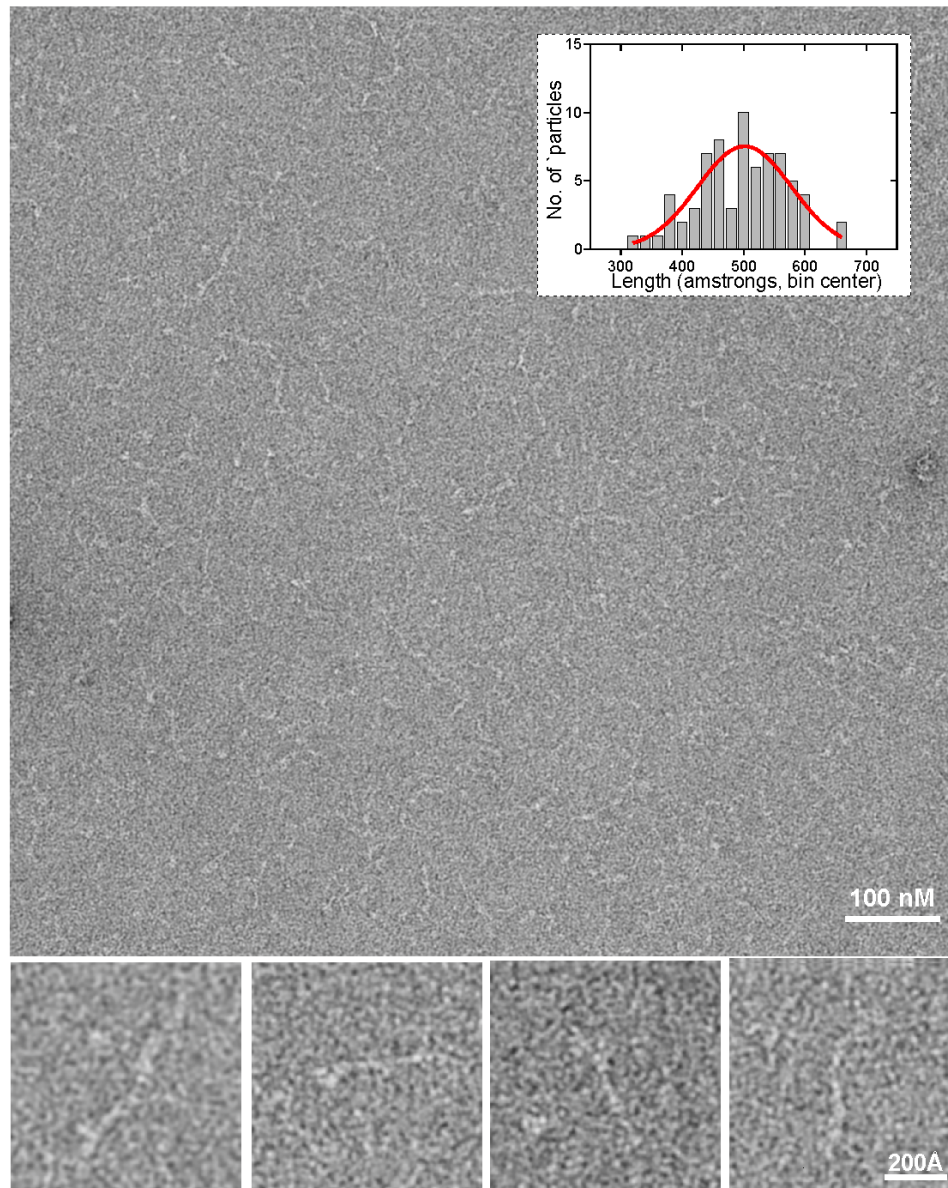

**A**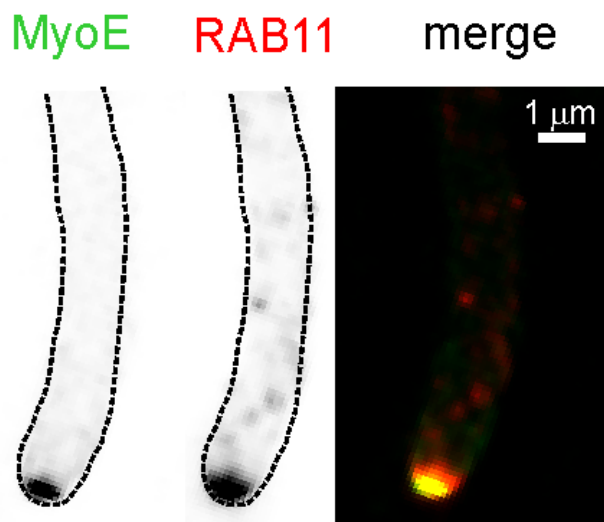**B**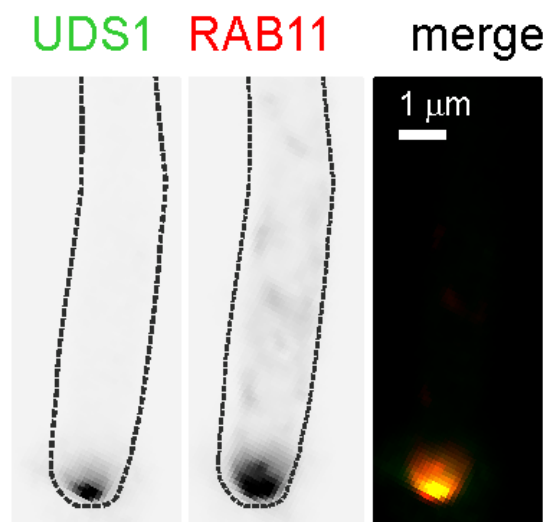**C**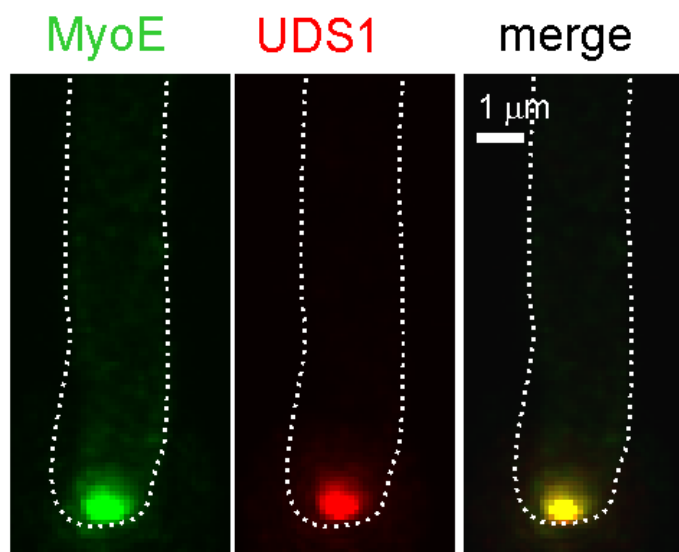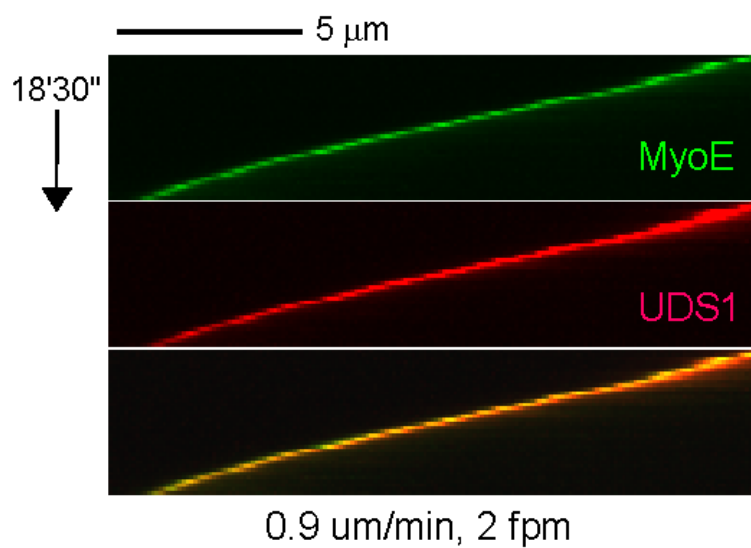**D**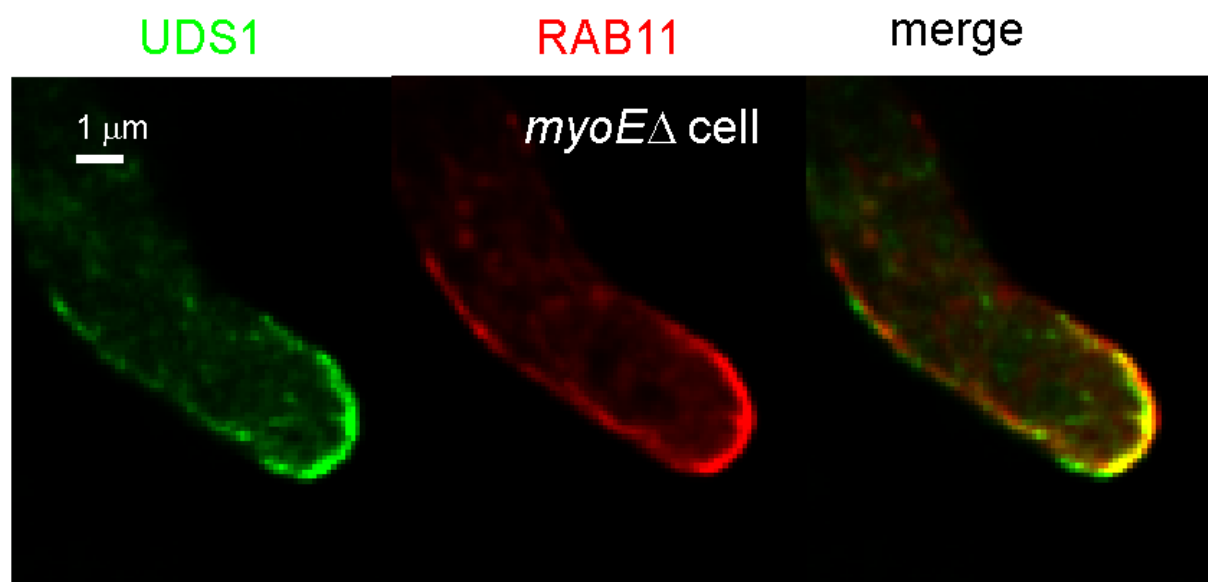

**A**

| GFP bait      | # PSMs   |      |      |           |
|---------------|----------|------|------|-----------|
|               | myosin-5 | HMSV | UDS1 | Uso1/p115 |
| myosin-5      | 436      | 174  | 7    | 0         |
| HMSV (AN1213) | 346      | 184  | 9    | 0         |
| UDS1 (AN5595) | 61       | 42   | 327  | 11        |
| Uso1          | 18       | 4    | 0    | 310       |

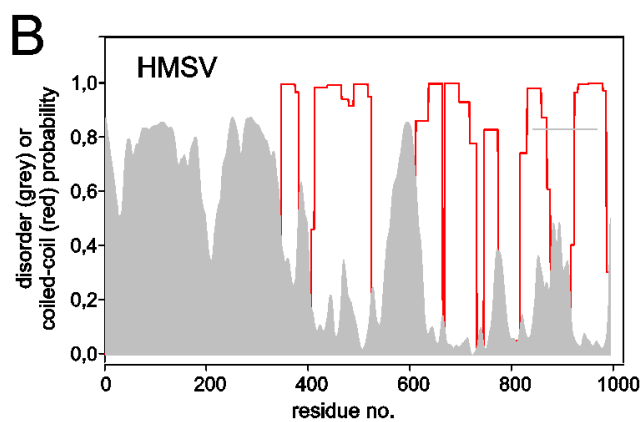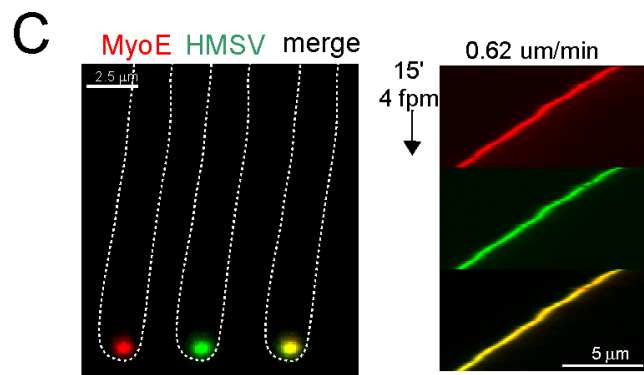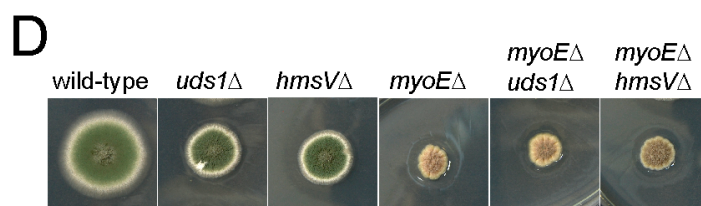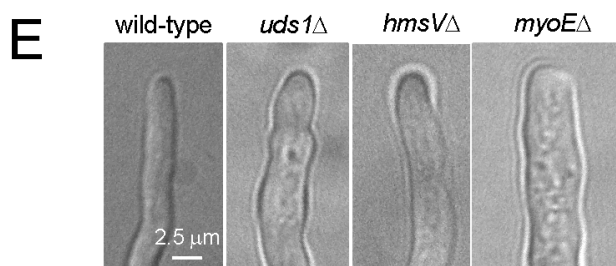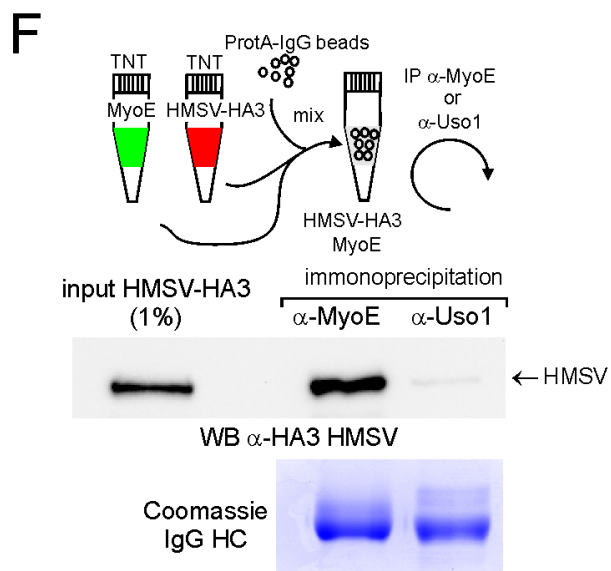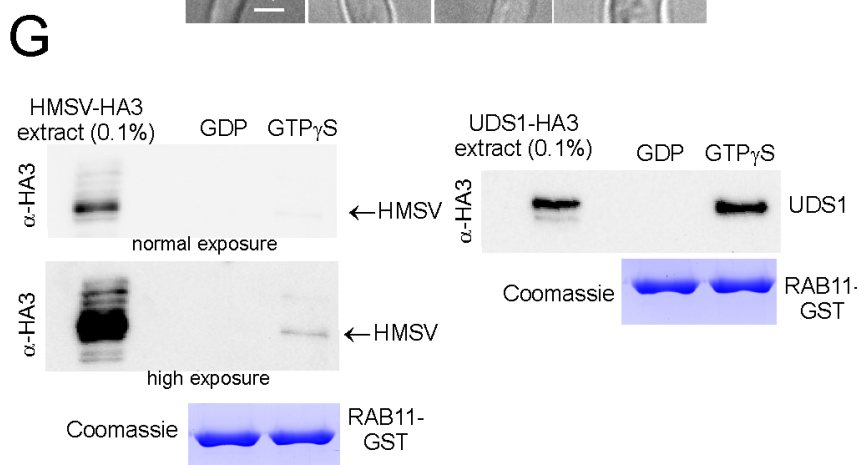



**A**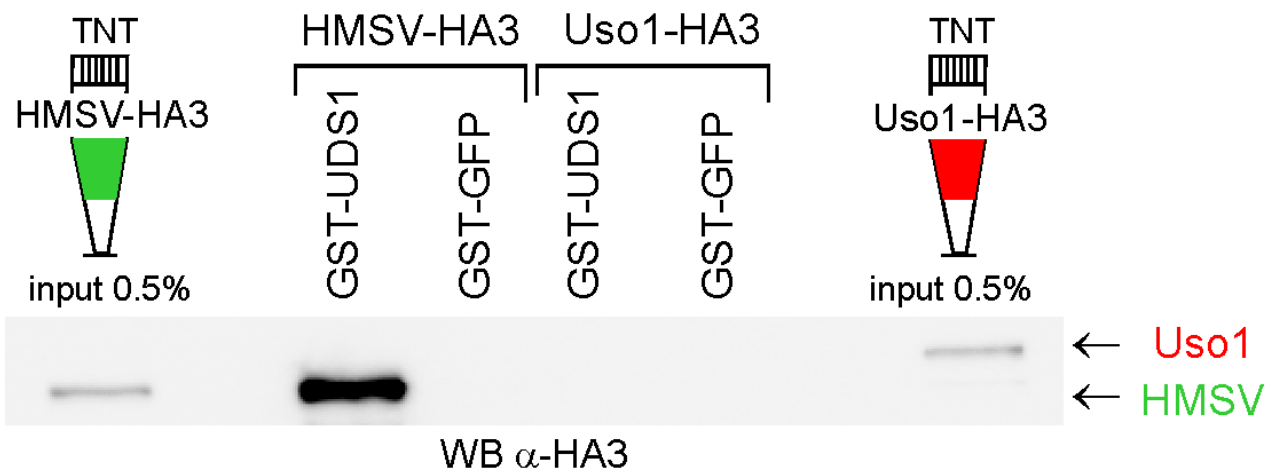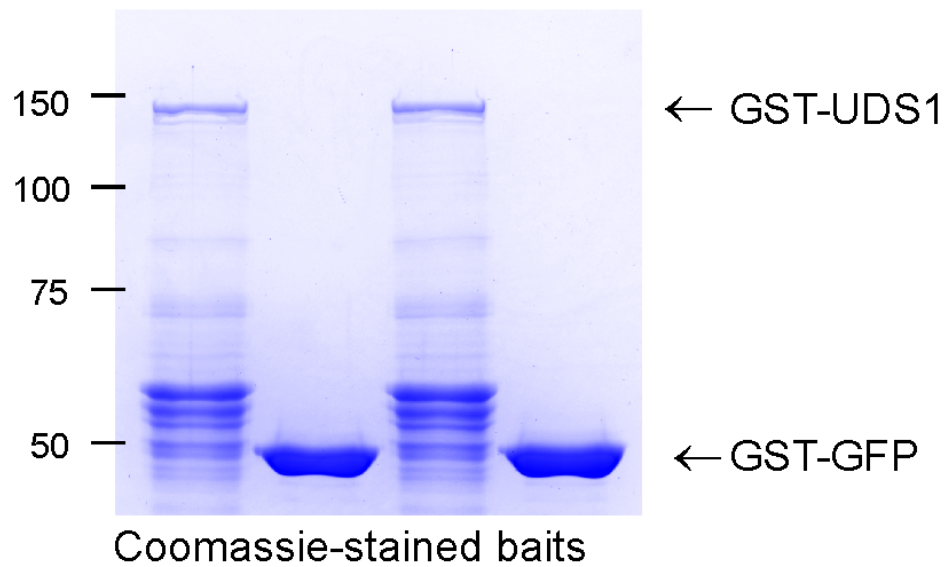**B**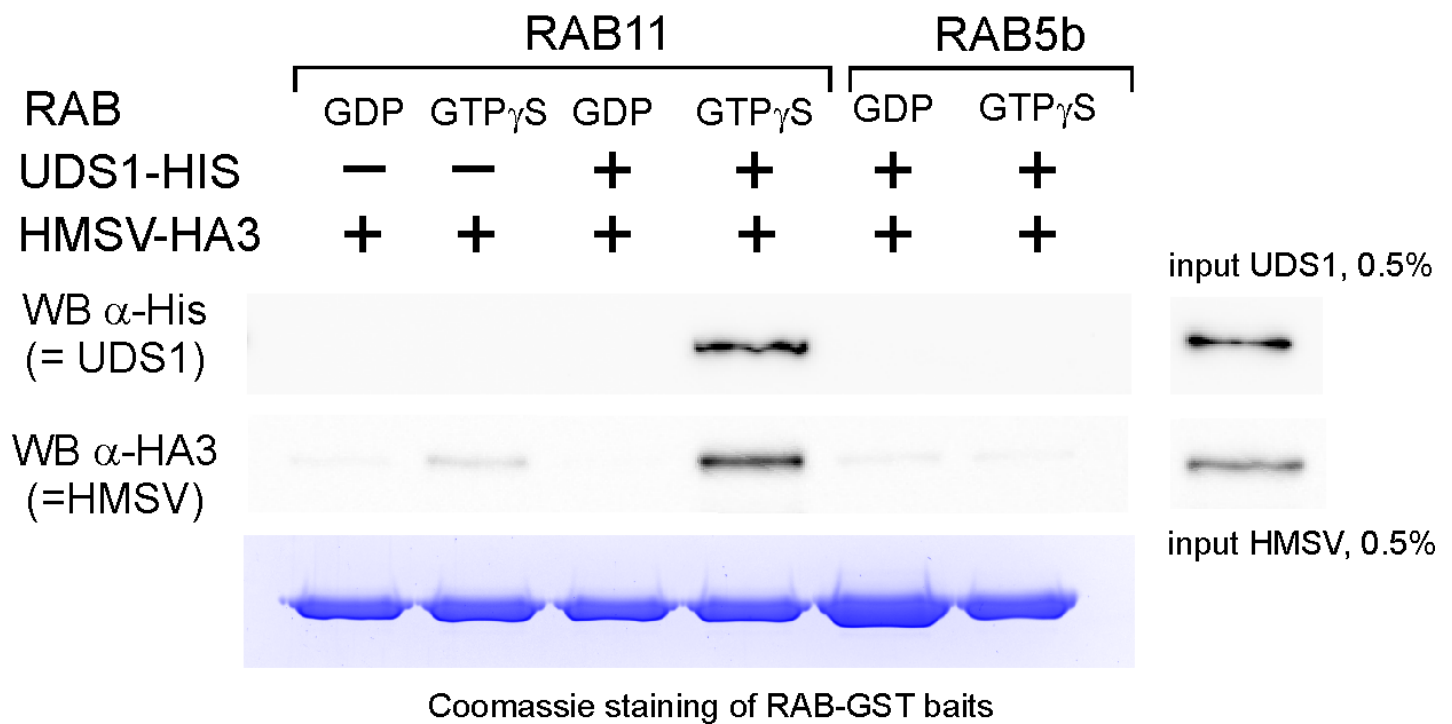

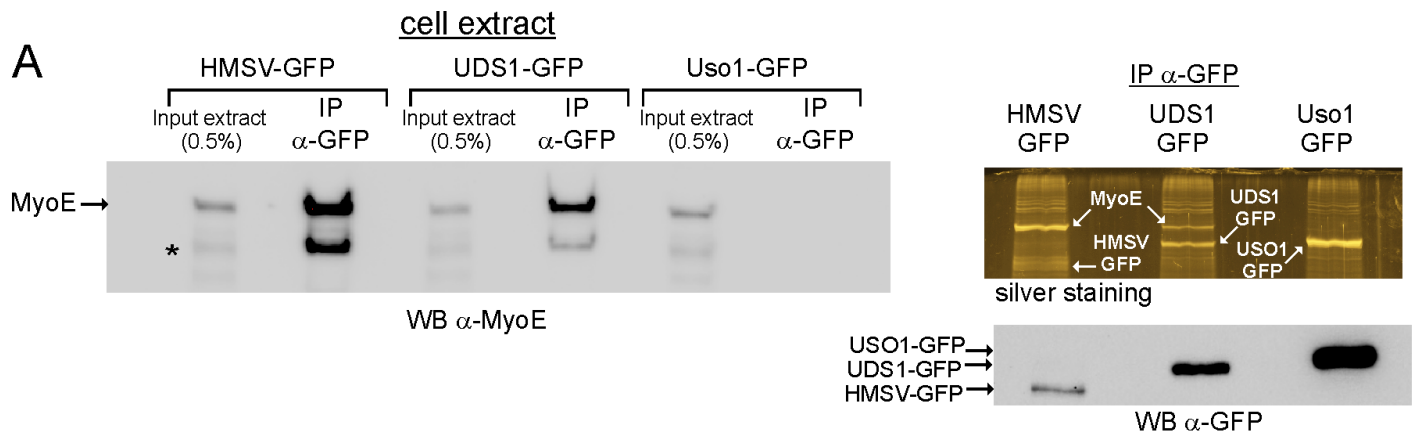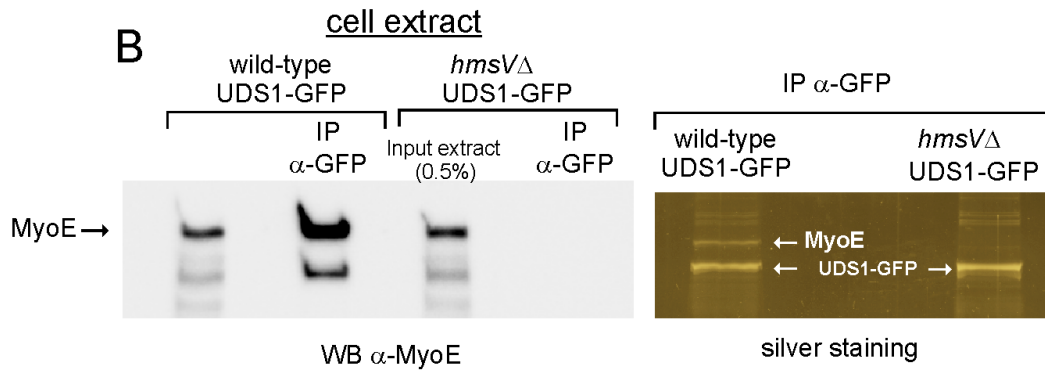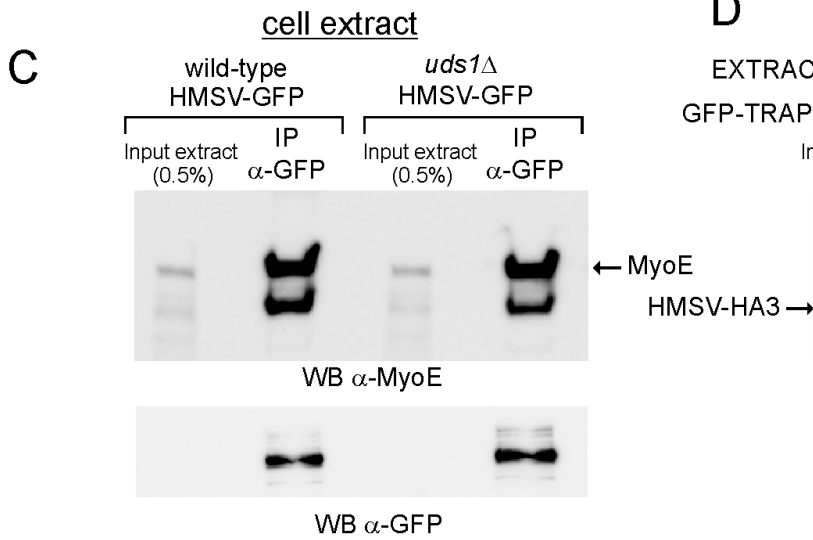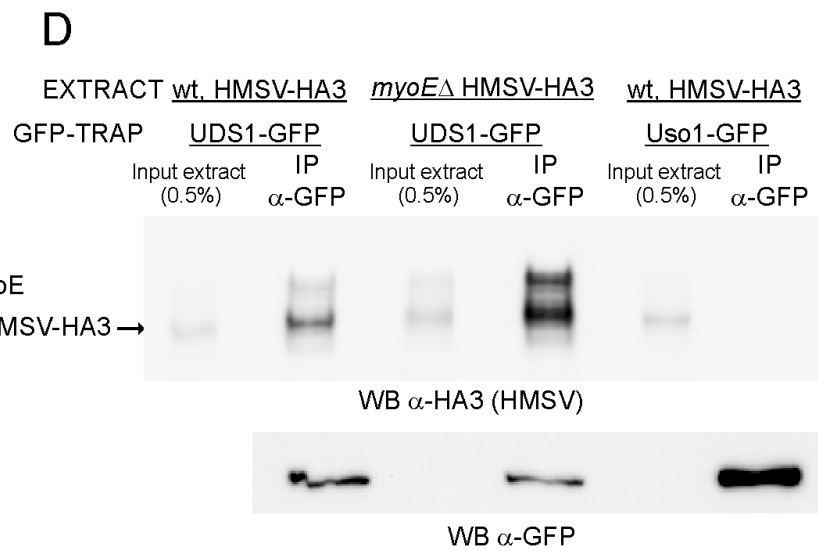

**A**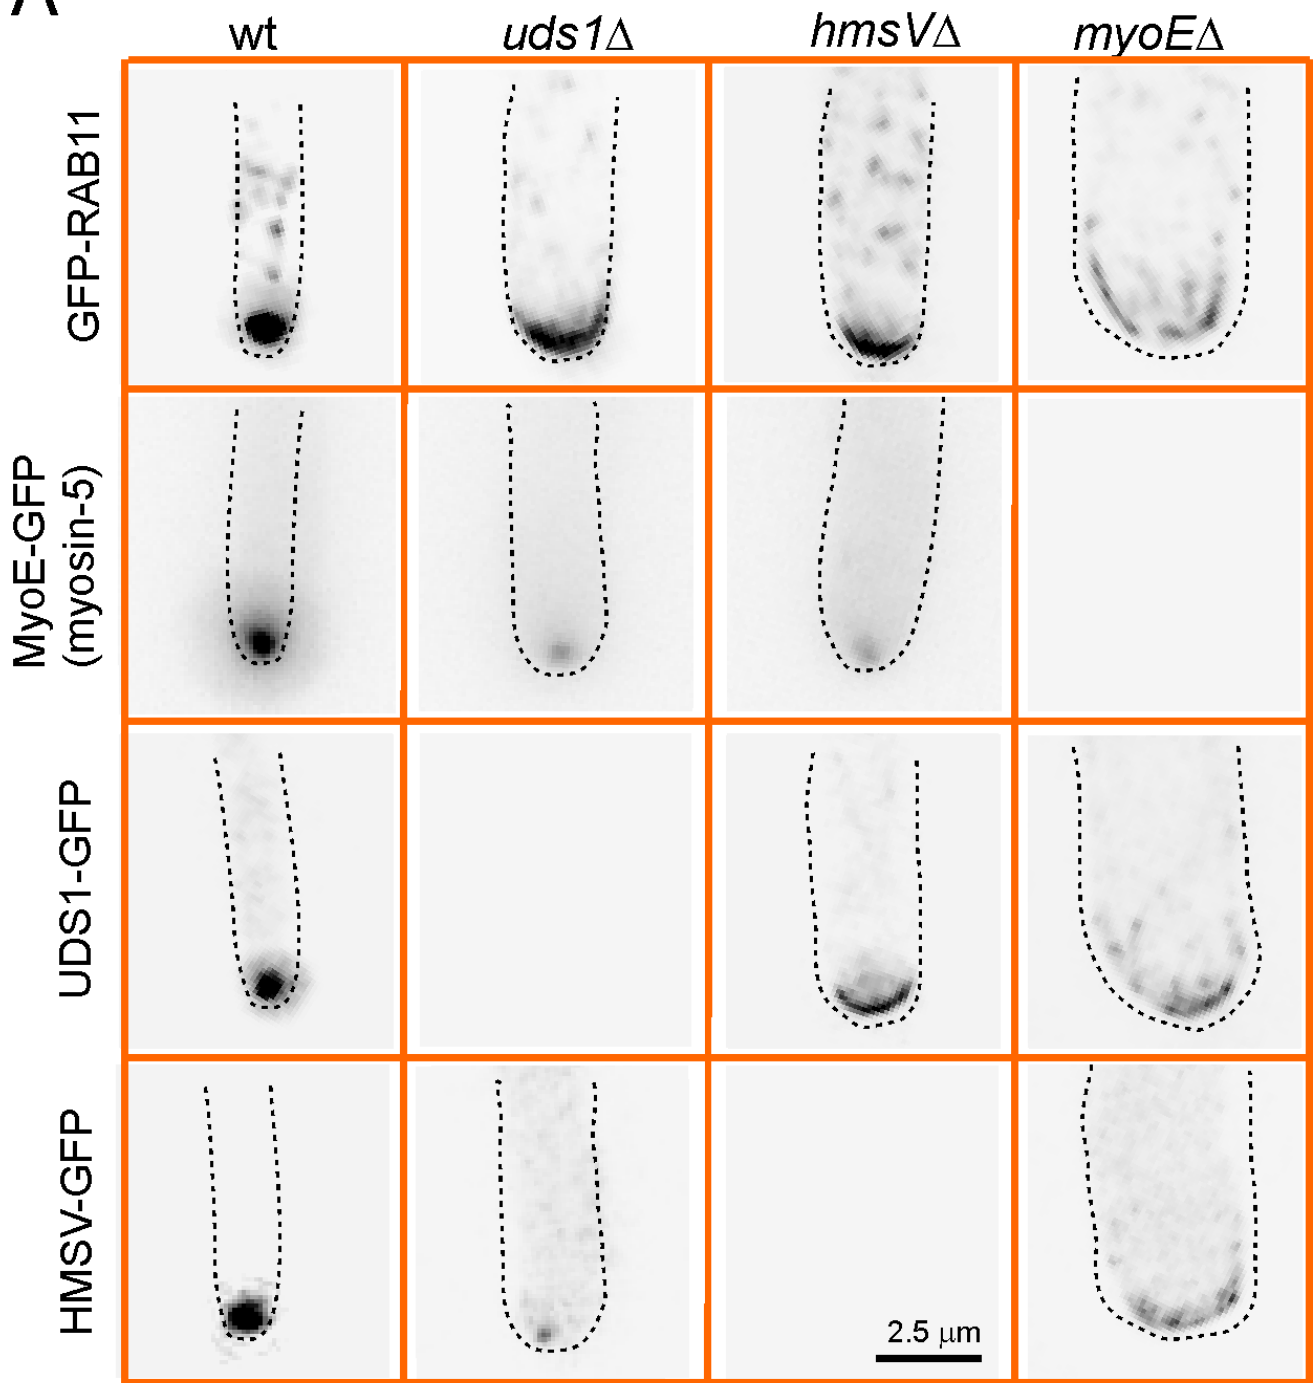**B**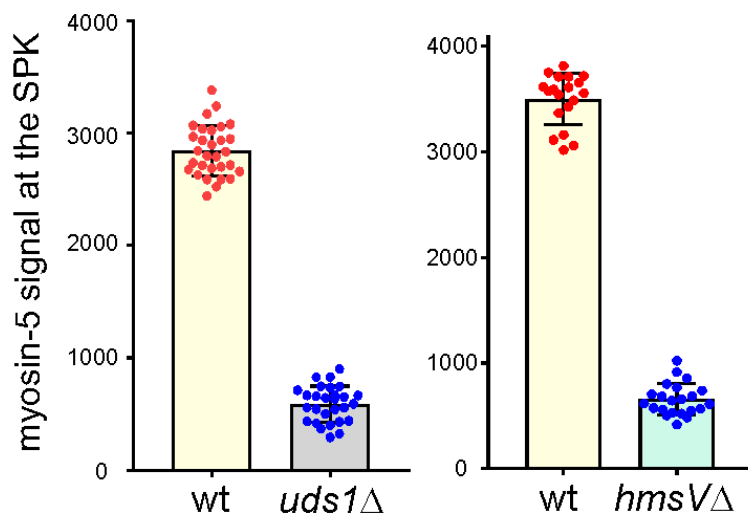

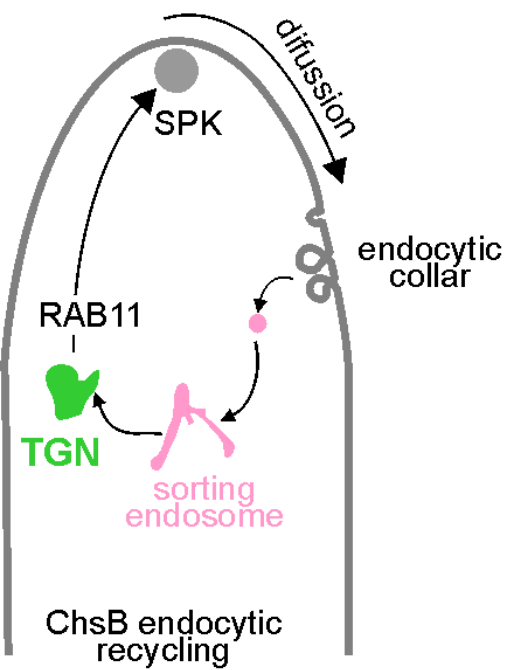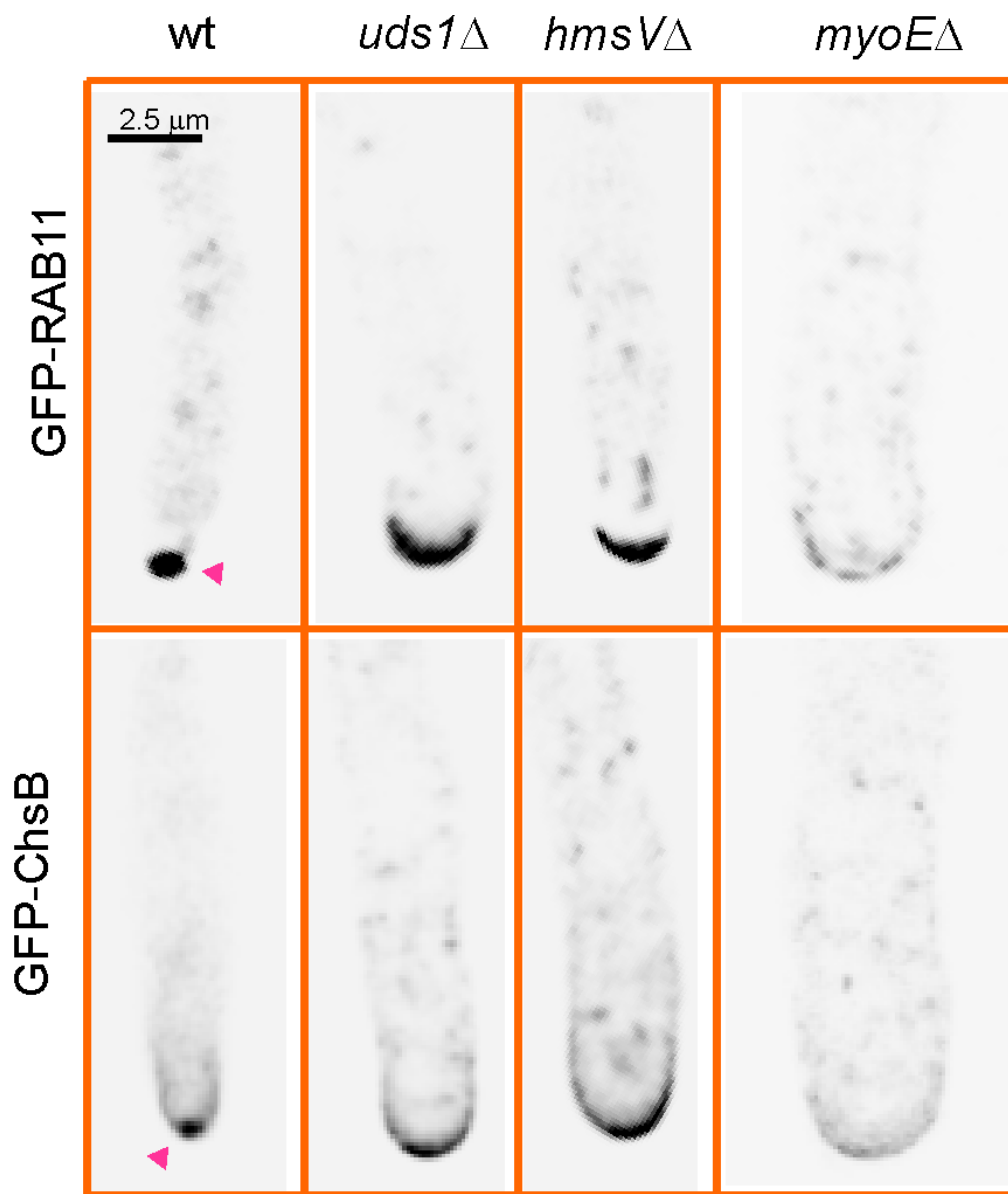

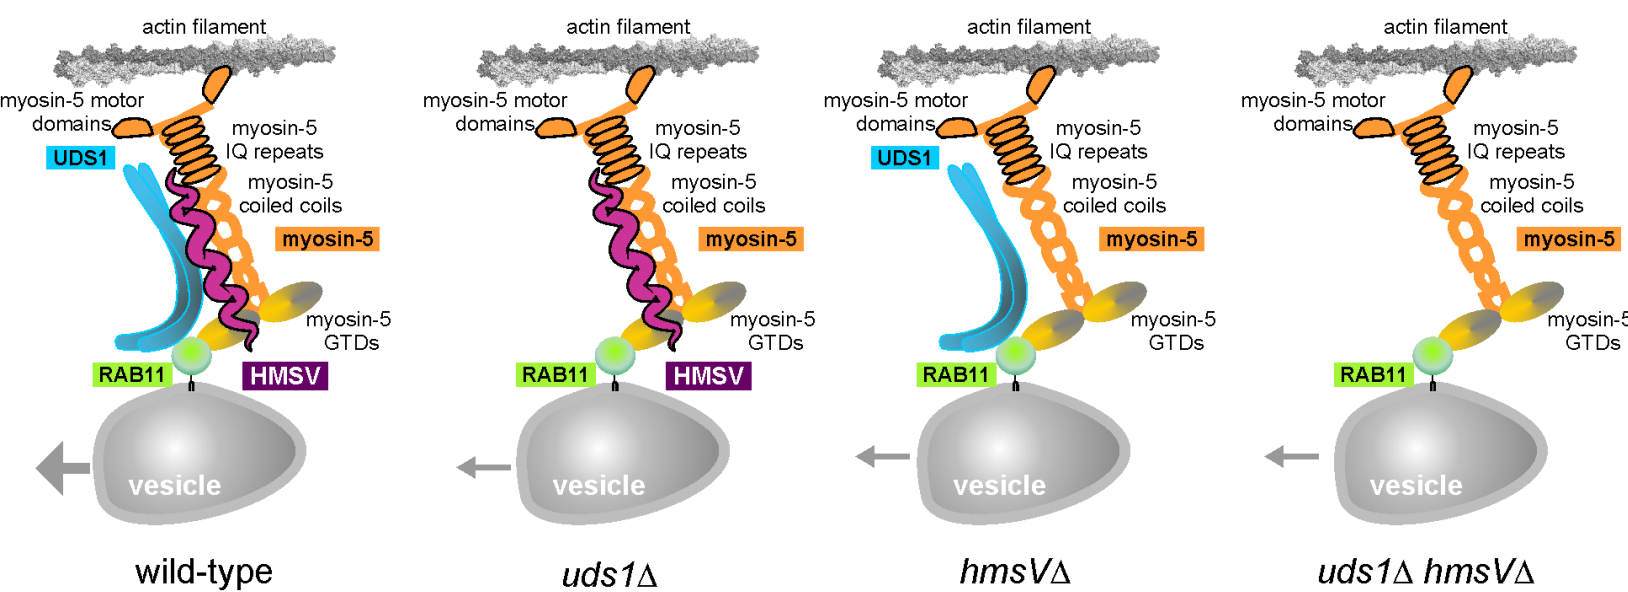

## **Supplemental Materials**

### **A novel RAB11-containing adaptor complex anchoring myosin-5 to secretory vesicles**

(Includes Movie legends, also annexed to the main manuscript to facilitate revision)

Mario Pinar, Ana Alonso, Vivian de los Ríos, Ignacio Bravo-Plaza, Álvaro Gandara, Ernesto Arias-Palomo and Miguel Á. Peñalva\*

\*Corresponding author. Email: [penalva@cib.csic.es](mailto:penalva@cib.csic.es)

#### **This PDF file includes:**

Figs. S1 to S2  
Table S1  
Movies S1 to S8 legends

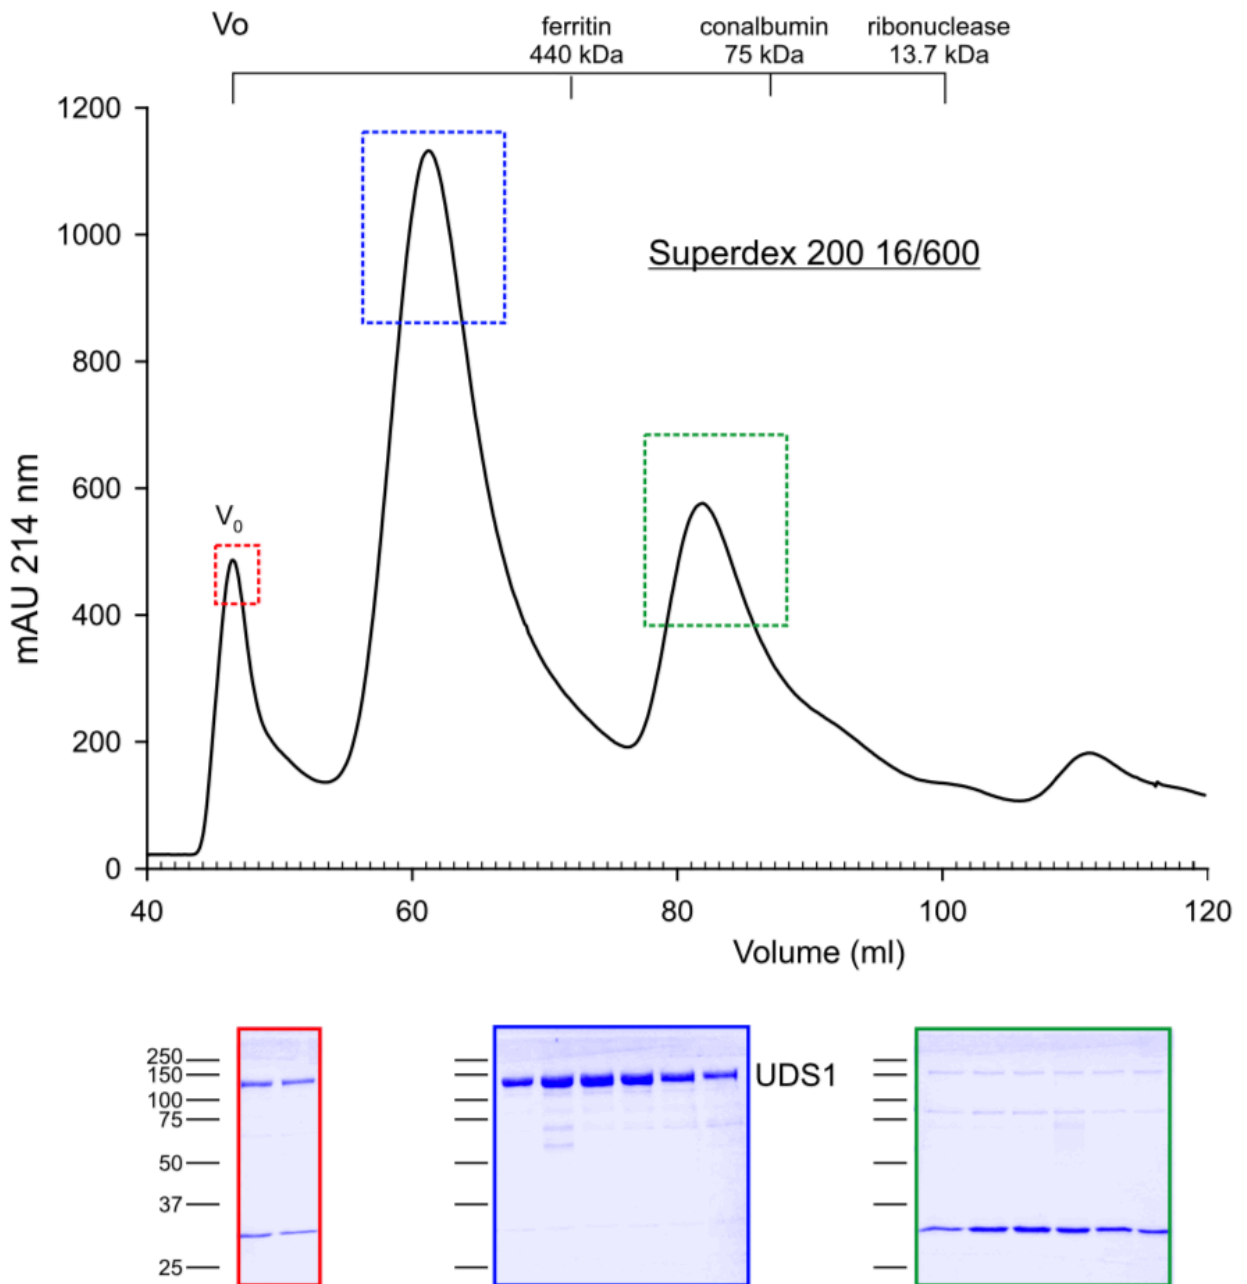

**Fig. S1. Gel filtration showing the elution profile of UDS1**

UDS1-His6 previously purified by Ni<sup>2+</sup> chromatography was injected onto a Hiloal 16/200 Superdex 600 gel filtration column, which was run at 1ml/min. Aliquots of fractions corresponding to the middle of the peaks were analyzed by SDS-PAGE and Coomassie staining.

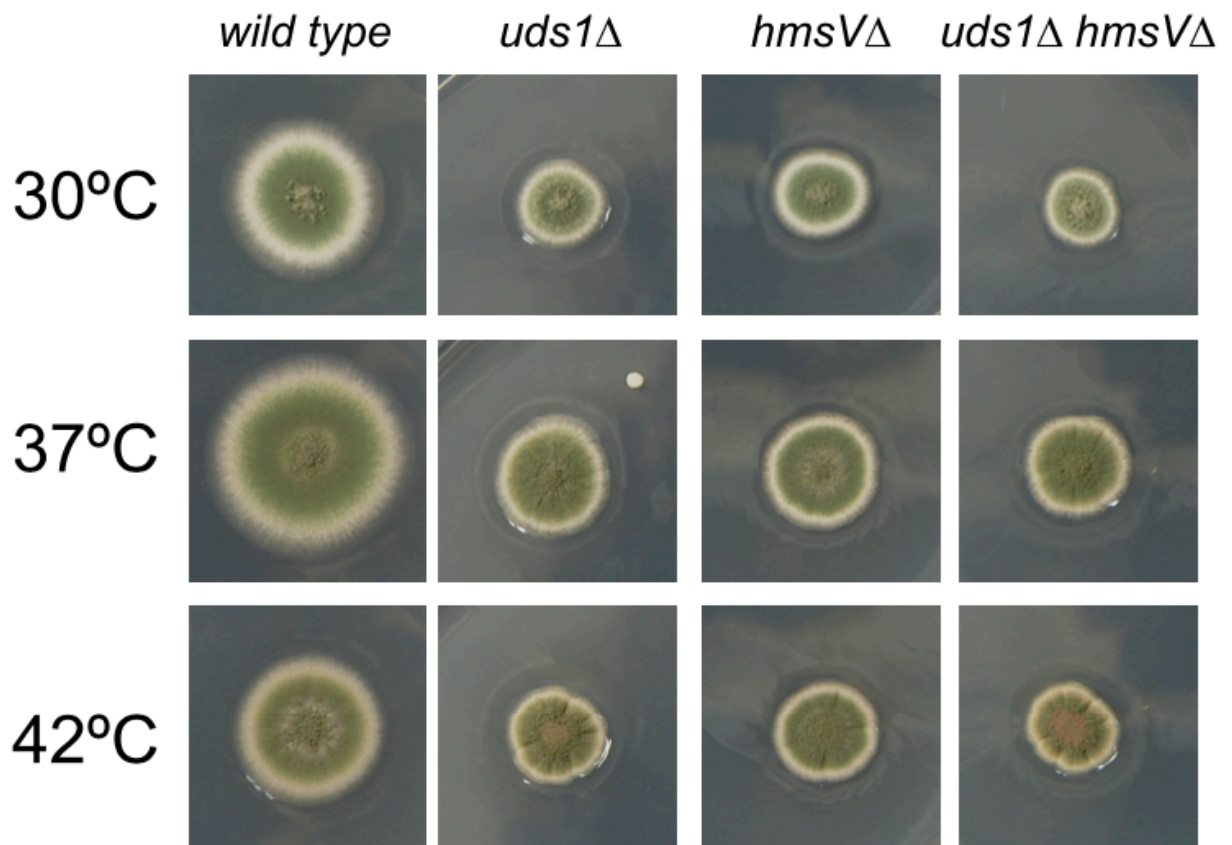

**Fig. S2. Growth of the double *uds1* $\Delta$  *hmsV* $\Delta$  mutant is indistinguishable from the single mutants**

Growth tests of different strains on *Aspergillus* complete medium at the indicated temperatures.



**Table S1: Strain genotypes**

|         |                                                                                                                                                |
|---------|------------------------------------------------------------------------------------------------------------------------------------------------|
| MAD3584 | <i>pyrG89; pyroA4 nkuAΔ::bar sec4Δ::pyrG<sup>Af</sup></i>                                                                                      |
| MAD4225 | <i>yA2 pyrG89?; nkuAΔ::bar?; pantoB100; [rab11p::rab11::rab11p::gfp::rab11::pyrG<sup>Af</sup>]</i>                                             |
| MAD4403 | <i>pabaA1; pyroA4, myoE::gfp::pyrG<sup>Af</sup> argB2[argB*-alcAp::mcherry::rab11]</i>                                                         |
| MAD4406 | <i>pabaA1 pyrG89?; myoE::gfp::pyrG<sup>Af</sup>, nkuAΔ::bar?</i>                                                                               |
| MAD4410 | <i>pyrG89?; pyroA4 nkuAΔ::argB; myoEΔ::pyrG<sup>Af</sup></i>                                                                                   |
| MAD4412 | <i>pyrG89?; myoEΔ::pyrG<sup>Af</sup>, nkuAΔ::argB?; pantoB100; [rab11p::rab11::rab11p::gfp::rab11::pyrG<sup>Af</sup>]</i>                      |
| MAD4831 | <i>pyrG89?; sec4Δ::pyrG<sup>Af</sup>, nkuAΔ::bar?; [rab11p::rab11::rab11p::gfp::rab11::pyrG<sup>Af</sup>]</i>                                  |
| MAD5736 | <i>pyrG89; pyroA4 nkuAΔ::bar</i>                                                                                                               |
| MAD5851 | <i>pyrG89; nkuAΔ::bar pyroA4; gfp::chsB::pyrG<sup>Af</sup></i>                                                                                 |
| MAD5918 | <i>pyrG89; myoE::pyrG<sup>Af</sup>, pyroA4 nkuAΔ::bar; riboB2</i>                                                                              |
| MAD5919 | <i>pyrG89; myoE<sup>Y1414R</sup>::pyrG<sup>Af</sup>; pyroA4 nkuAΔ::bar; riboB2</i>                                                             |
| MAD5920 | <i>pyrG89; myoE<sup>K1472E</sup>::pyrG<sup>Af</sup>; pyroA4 nkuAΔ::bar; riboB2</i>                                                             |
| MAD6024 | <i>pyrG89?; myoE<sup>K1472E</sup>::pyrG<sup>Af</sup>, sec4Δ::pyrG<sup>Af</sup> nkuAΔ::bar?; riboB2</i>                                         |
| MAD6034 | <i>pabaA1 pyrG89?; myoE::pyrG<sup>Af</sup>; sec4Δ::pyrG<sup>Af</sup> nkuAΔ::bar?</i>                                                           |
| MAD6072 | <i>pyrG89?; myoE<sup>Y1414R</sup>::pyrG<sup>Af</sup>, sec4Δ::pyrG<sup>Af</sup> pyroA4 nkuAΔ::bar?</i>                                          |
| MAD6264 | <i>pabaA1; uds1Δ::pyrG<sup>Af</sup></i>                                                                                                        |
| MAD6358 | <i>pabaA1 pyrG89?; nkuAΔ::bar?; uso1::gfp::pyrG<sup>Af</sup></i>                                                                               |
| MAD6379 | <i>pyrG89; pyroA4 nkuAΔ::bar; uds1::gfp::pyrG<sup>Af</sup></i>                                                                                 |
| MAD6453 | <i>pabaA1 pyrG89?; nkuAΔ::argB?; uds1Δ::pyrG<sup>Af</sup>; [rab11p::rab11::rab11p::gfp::rab11::pyrG<sup>Af</sup>]</i>                          |
| MAD6462 | <i>pabaA1 pyrG89?; myoEΔ::pyrG<sup>Af</sup>, nkuAΔ::argB?; uds1Δ::pyrG<sup>Af</sup></i>                                                        |
| MAD6635 | <i>pyrG89 pabaA1; [rab11p::rab11::rab11p::mcherry::rab11::pyrG<sup>Af</sup>]</i>                                                               |
| MAD7168 | <i>pyrG89?; wA3; myoE::gfp::pyrG<sup>Af</sup>; pyroA4 nkuAΔ::bar?; uds1Δ::pyrG<sup>Af</sup></i>                                                |
| MAD7227 | <i>pyrG89; pyroA4 nkuAΔ::bar; uds1::ha3::pyrG<sup>Af</sup></i>                                                                                 |
| MAD7255 | <i>pyrG89?; pyroA4 nkuAΔ::bar?; uds1::gfp::pyrG<sup>Af</sup> [rab11p::rab11::rab11p::mcherry::rab11::pyrG<sup>Af</sup>]</i>                    |
| MAD7257 | <i>pabaA1; myoEΔ::pyrG<sup>Af</sup>; nkuAΔ::bar?; uds1::gfp::pyrG<sup>Af</sup>; [rab11p::rab11::rab11p::mcherry::rab11::pyrG<sup>Af</sup>]</i> |
| MAD7326 | <i>pyrG89; pyroA4 nkuAΔ::bar; hmsV::gfp::pyrG<sup>Af</sup></i>                                                                                 |
| MAD7380 | <i>pyrG89; pyroA4 nkuAΔ::bar; hmsVΔ::pyrG<sup>Af</sup></i>                                                                                     |
| MAD7391 | <i>pyrG89; pyroA4 nkuAΔ::bar; uds1Δ::pyrG<sup>Af</sup>; hmsVΔ::riboB<sup>Af</sup> riboB2</i>                                                   |
| MAD7403 | <i>pyrG89?; myoE::gfp::pyrG<sup>Af</sup>, nkuAΔ::bar?; uds1::tdtomato::pyrG<sup>Af</sup></i>                                                   |
| MAD7418 | <i>pyrG89?; myoEΔ::pyrG<sup>Af</sup>; pyroA4 nkuAΔ::bar?; hmsV::gfp::pyrG<sup>Af</sup></i>                                                     |
| MAD7421 | <i>pabaA1 pyrG89?; nkuAΔ::bar?; uds1Δ::pyrG<sup>Af</sup>; hmsV::gfp::pyrG<sup>Af</sup></i>                                                     |
| MAD7424 | <i>pyrG89; pyroA4 nkuAΔ::bar; uds1::gfp::pyrG<sup>Af</sup>; hmsVΔ::pyrG<sup>Af</sup></i>                                                       |
| MAD7426 | <i>pabaA1 pyrG89?; myoE::gfp::pyrG<sup>Af</sup>, nkuAΔ::bar?; hmsVΔ::pyrG<sup>Af</sup></i>                                                     |
| MAD7430 | <i>pabaA1 pyrG89; nkuAΔ::bar; hmsV::ha3::pyrG<sup>Af</sup></i>                                                                                 |
| MAD7432 | <i>pyrG89; nkuAΔ::bar?; hmsVΔ::pyrG<sup>Af</sup> [rab11p::rab11::rab11p::gfp::rab11::pyrG<sup>Af</sup>]</i>                                    |
| MAD7470 | <i>pyrG89?; myoEΔ::pyrG<sup>Af</sup>; nkuAΔ::bar?; hmsVΔ::pyrG<sup>Af</sup></i>                                                                |
| MAD7478 | <i>pabaA1 pyrG89; nkuAΔ::bar; uds1::gfp::pyrG<sup>Af</sup>; hmsV::ha3::pyrG<sup>Af</sup></i>                                                   |
| MAD7488 | <i>pabaA1 pyrG89; nkuAΔ::bar; uso1::gfp::pyrG<sup>Af</sup> hmsV::ha3::pyrG<sup>Af</sup></i>                                                    |
| MAD7533 | <i>pyrG89; nkuAΔ::bar; myoEΔ::pyrG<sup>Af</sup>; uds1::gfp::pyrG<sup>Af</sup>; hmsV::ha3::pyrG<sup>Af</sup></i>                                |
| MAD7548 | <i>pyrG89?; nkuAΔ::bar?; uds1Δ::pyrG<sup>Af</sup>; gfp::chsB::pyrG<sup>Af</sup></i>                                                            |
| MAD7550 | <i>pabaA1 pyrG89?; nkuAΔ::bar?; gfp::chsB::pyrG<sup>Af</sup>; hmsVΔ::pyrG<sup>Af</sup></i>                                                     |
| MAD7560 | <i>pyrG89; pyroA4 nkuAΔ::bar; inuAp::gfp::myoE-GTD::pyrG<sup>Af</sup>::inuAt</i>                                                               |
| MAD7585 | <i>pyrG89?; inuAp::gfp::myoE-GTD::pyrG<sup>Af</sup>::inuAt; pyroA4 nkuAΔ::bar? sec4Δ::pyrG<sup>Af</sup></i>                                    |
| MAD7591 | <i>pyrG89?; myoEΔ::pyrG<sup>Af</sup> inuAp::gfp::myoE-GTD::pyrG<sup>Af</sup>::inuAp; pyroA4 nkuAΔ::bar?</i>                                    |
| MAD7639 | <i>pabaA1 pyrG89?; myoE::mcherry::pyrG<sup>Af</sup>, nkuAΔ::bar?; hmsV::gfp::pyrG<sup>Af</sup></i>                                             |
| MAD7643 | <i>pyrG89?; myoEΔ::pyrG<sup>Af</sup>, pyroA4 nkuAΔ::bar?; gfp::chsB::pyrG<sup>Af</sup></i>                                                     |

### **Movie S1**

GFP-tagged myosin-5 (MyoE) concentrates at the SPK/vesicle supply center of a *sec4Δ* cell. The movie was built with 100 frames representing middle planes of the cell, acquired (streaming to the RAM) at 2.5 fps (total 40 sec). Timestamp is in sec. msec.

### **Movie S2**

GFP-GTD (inverted greyscale) arriving at the apical dome of a *myoEΔ* cells by way of MT-dependent transport, implying that the myosin-5 GTD is sufficient to bind SVs. The movie was built with 300 frames representing middle planes of the cell, acquired (streaming to the RAM) at 5 fps (total 1 min). Timestamp is in sec. msec.

### **Movie S3**

Co-filming of mCh-RAB11 and UDS1-GFP over a 25 min period. This movie was made with the simultaneously acquired (using a Gemini beam splitter) red and green channel images (shown in inverted greyscale) of a hypha co-expressing both proteins at physiological levels. Built with 101 frames acquired every 15 sec (0.066 fps). Timestamp in min. sec.

### **Movie S4**

UDS1-tdT and MyoE-GFP strictly colocalize over time at the SPK. Z-stacks of the corresponding channels (MIPs shown in inverted greyscale) were acquired every 30 sec (0.033 fps) for a total of 38 frames (18.5 min). Timestamp is in min. sec.

### **Movie S5**

UDS1-GFP arriving at the apical dome in a *myoEΔ* cell. Note the recurring dots localizing to the plasma membrane, in all likelihood representing SVs containing UDS1 that are being delivered to the dome by MT transport. The movie was made with middle planes streamed to the RAM of the computer every 400 msec (2.5 fps). Timestamp is in sec. msec.

### **Movie S6**

mCh-MyoE and HMSV-GFP strictly colocalize over time at the SPK. Z-stacks in the green and red channels were simultaneously acquired with a DualViewer every 15 sec (0.066 fps) for 15 min. The movie was built with the corresponding MIPs (shown in inverted greyscale). Timestamp is in min.sec.

### **Movie S7**

A wild-type and an *hmsV* $\Delta$  cell expressing MyoE-GFP are shown alongside using equivalent contrast to underline the reduced levels of MyoE at the mutant's SPK. Some moving vesicles are visible in the background. The movies were built with 100 middle planes acquired with the same settings and streamed to the computer's RAM every 100 msec (10 fps) for a total of 10 sec. Timestamp is in sec. msec.

### **Movie S8**

One hundred middle planes of a *myoE* $\Delta$  cell expressing HMSV-GFP were streamed to the computer's RAM every 400 msec (2.5 fps) for a total of 40 sec. Note that HMSV distributes like SVs arriving to the dome by MT transport. Time scale is in sec. msec.
